# Supplementary material
Source: PubMed Central journal article supplement (PMC8586054)

## Supplemental Materials.

**Supplemental Figure 1.** Heat map of 52 select proteins detected in serum from control and delirium cohorts clustered by Normalized Protein eXpression (NPX) values (Log<sub>2</sub> abundance).

**Supplemental Figure 2.** Confusion assessment method-long form (CAM-LF) scores from postoperative day (POD) 1 through 3, recorded twice daily and shown relative to FGF-21 levels detected at POD1 morning (POD1am).

**Supplemental Figure 3.** Pearson correlation coefficients ( $r$ ) comparing relationships between multiple variables including FGF-21 and IL-6 expression.

**Appendix A.** Individual graphs of proteins detected in the Olink proximity extension assays.

**Appendix B.** Individual graphs of proteins showing patient-specific changes from preoperative day 0 to postoperative day 1.

**Supplemental Figure 1.** Heat map of 52 select proteins detected in serum from control and delirium cohorts clustered by Normalized Protein eXpression (NPX) values (log2 abundance).

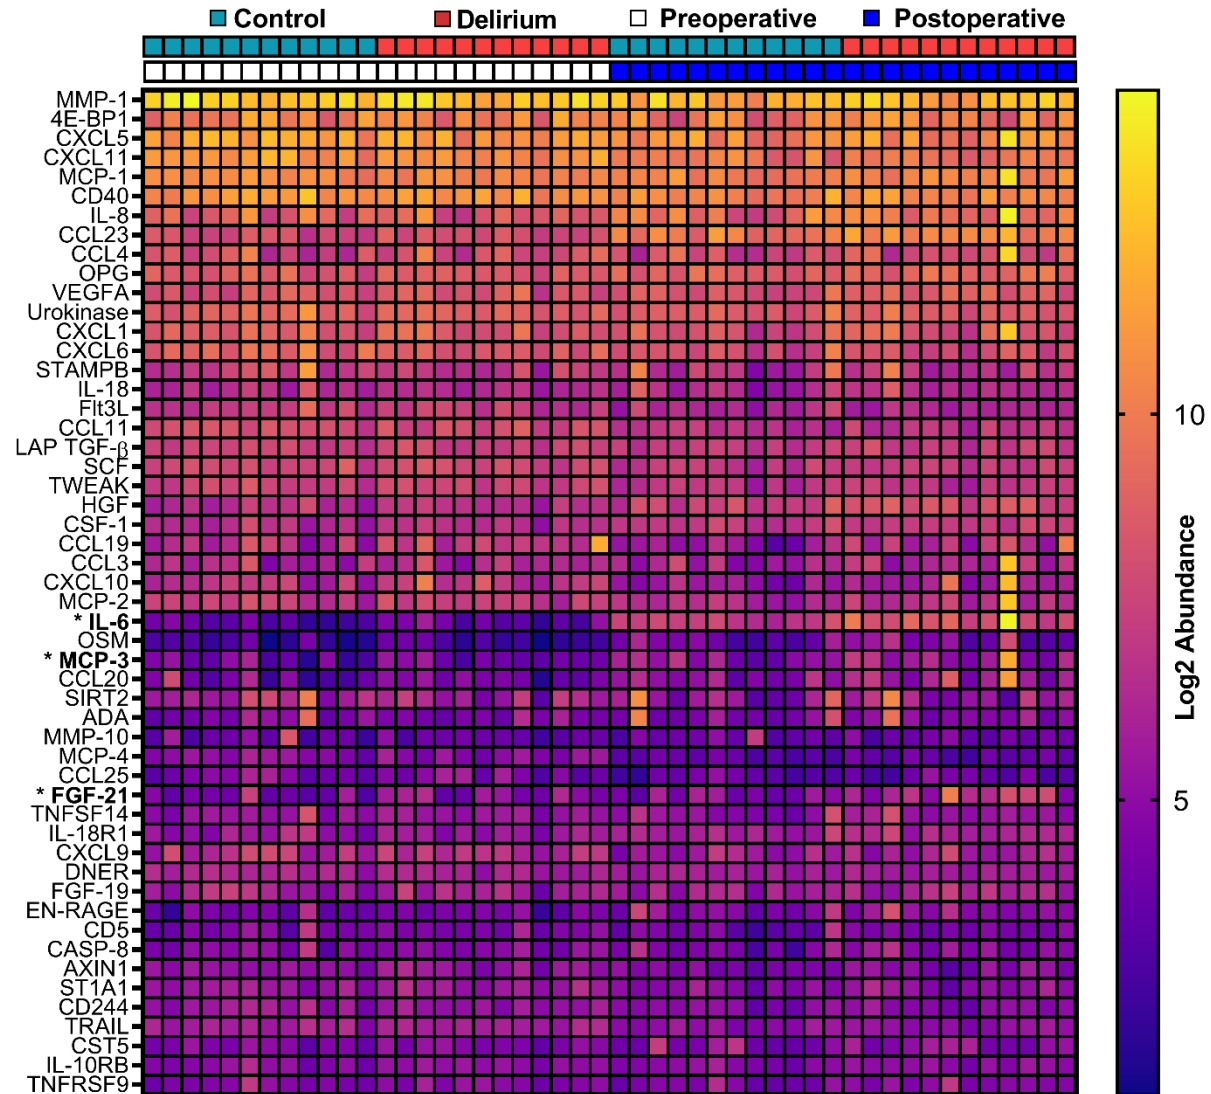

**Supplemental Figure 2.** Confusion assessment method-long form (CAM-LF) scores from postoperative day (POD) 1 through 3, recorded twice daily and shown relative to FGF-21 levels detected at POD1 morning (POD1am). The dotted red line represents the average postoperative FGF-21 level detected in the delirium cohort.

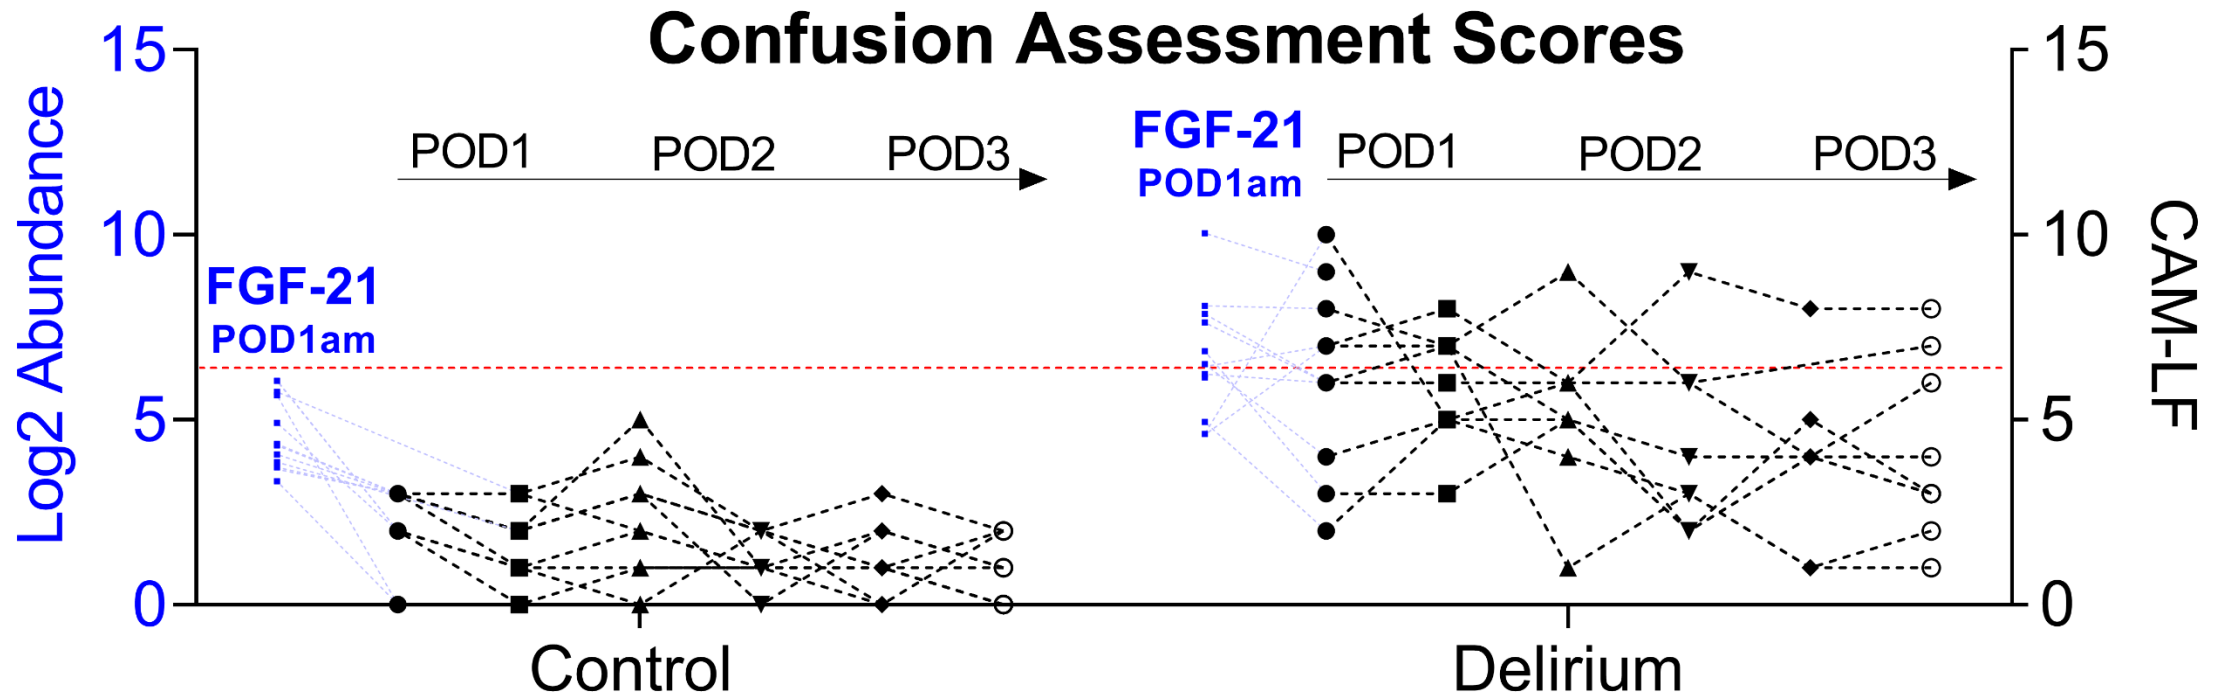

**Supplemental Figure 3.** Pearson correlation coefficients ( $r$ ) comparing relationships between multiple variables including FGF-21 and IL-6 expression.

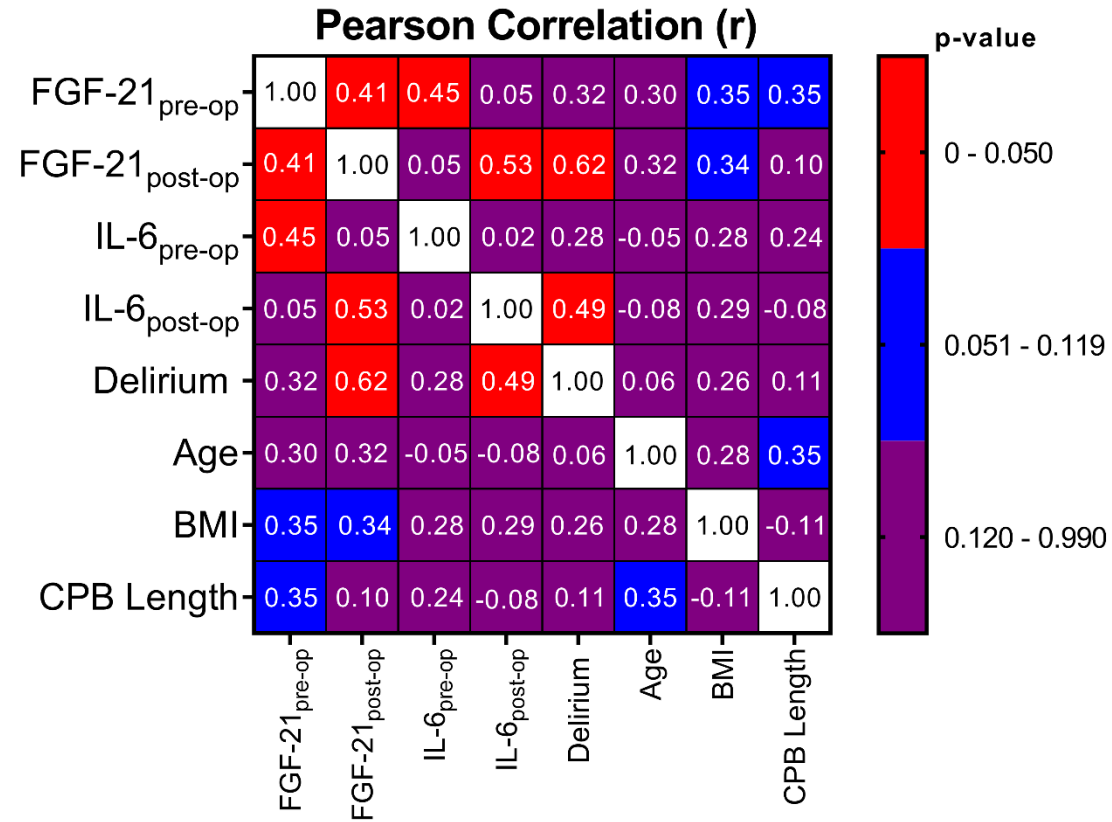

**Appendix A.** Individual graphs of proteins detected in the Olink proximity extension assays.

**Panels:**

Olink INFLAMMATION (v.3004) Panel

Olink NEURO EXPLORATORY (v.3901) Panel

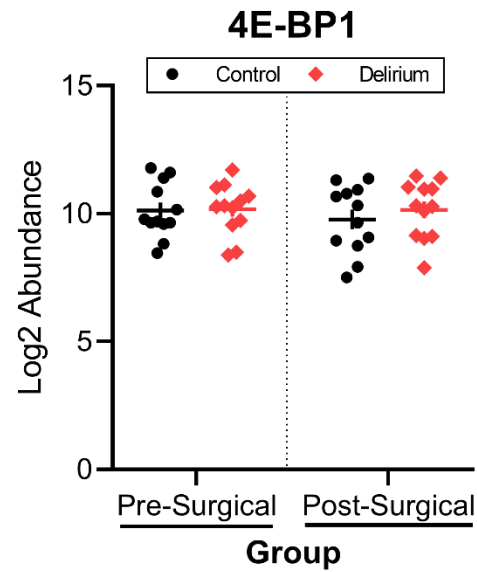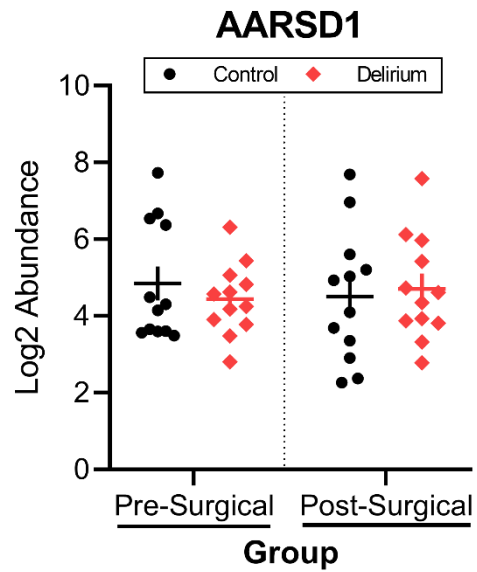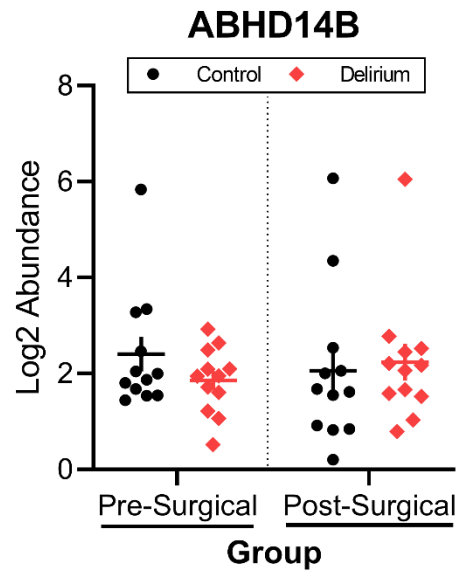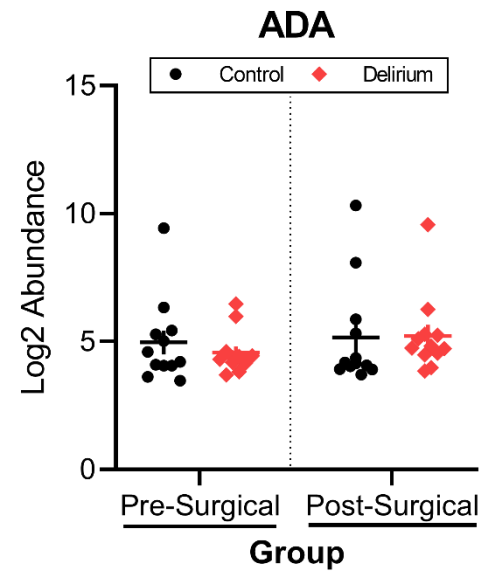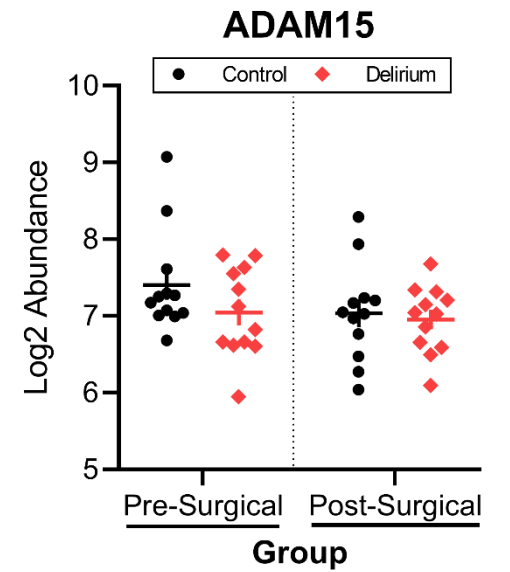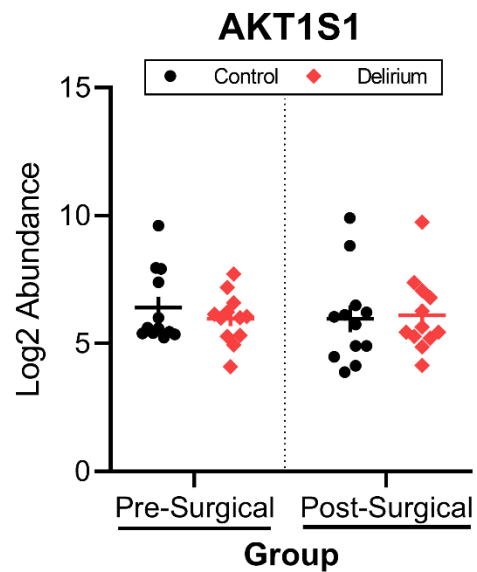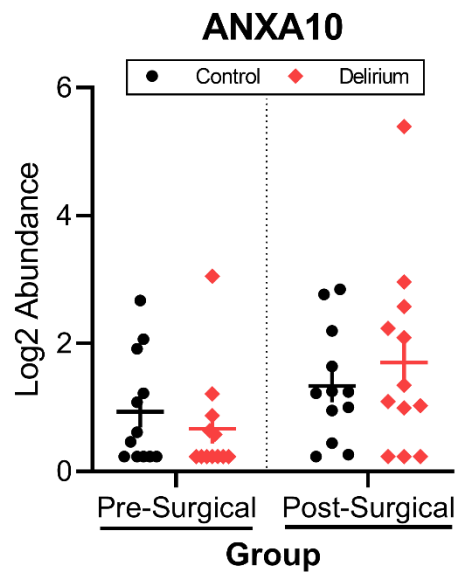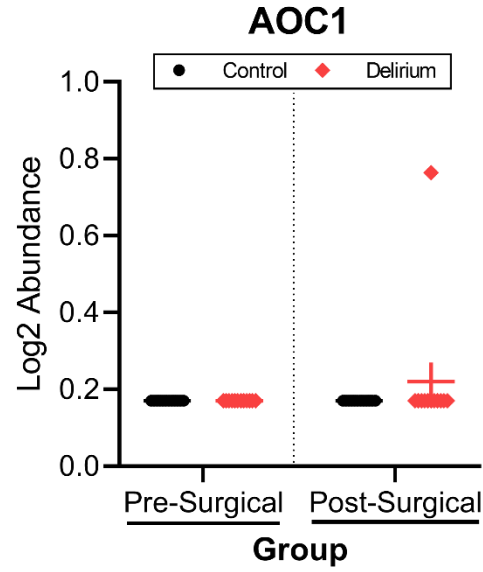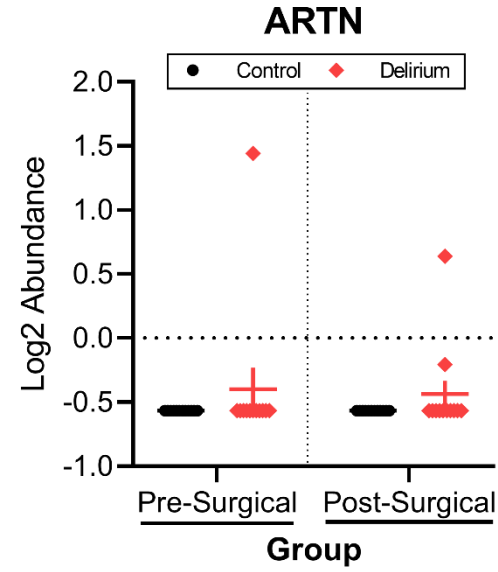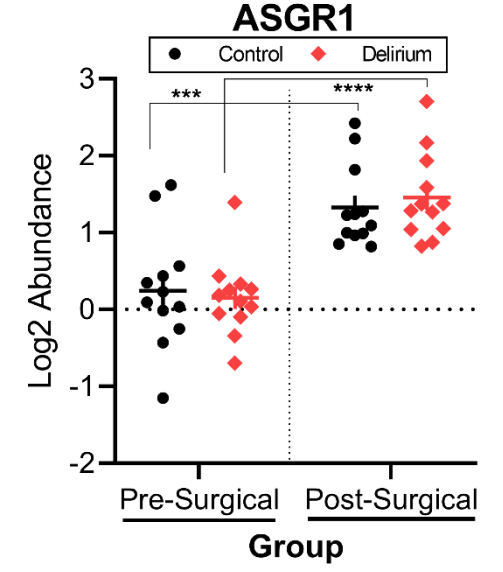

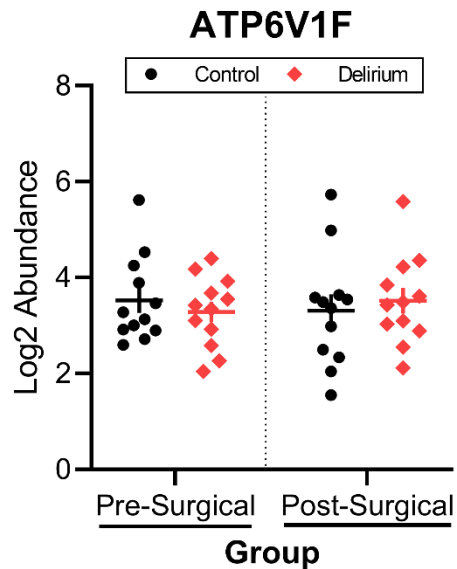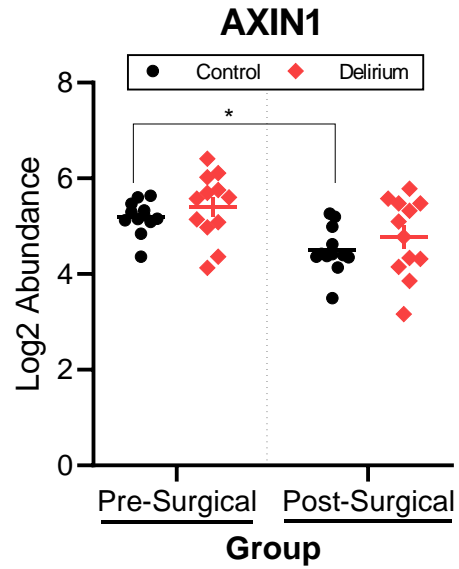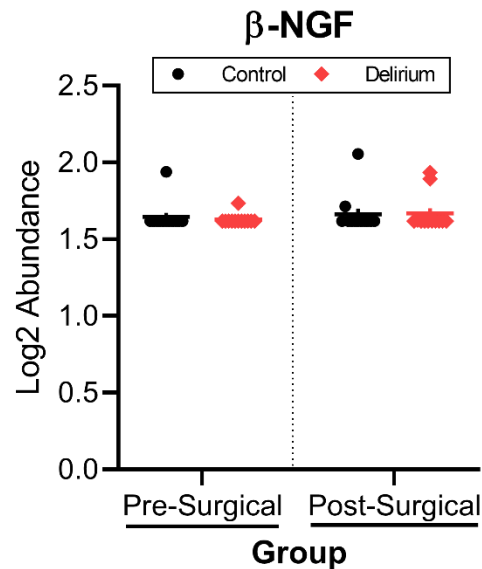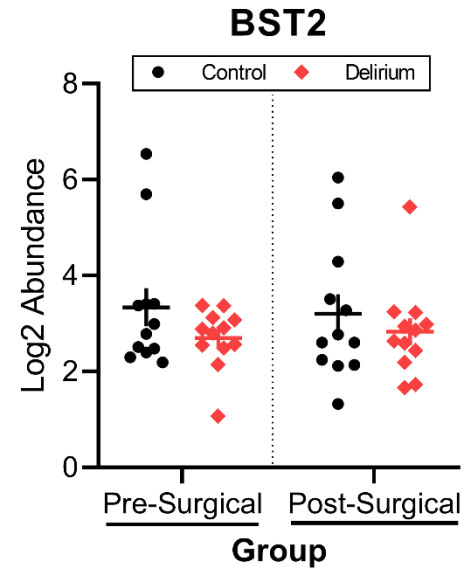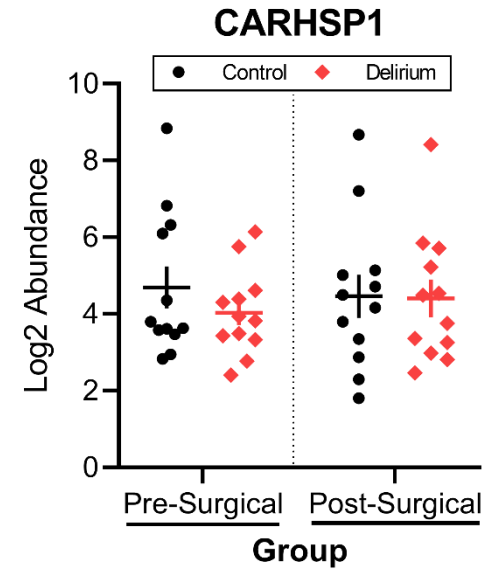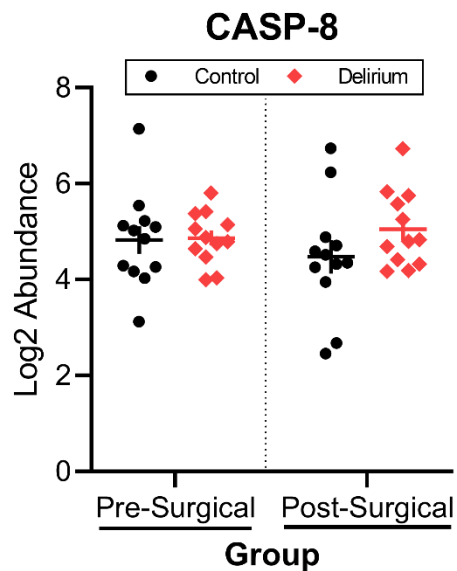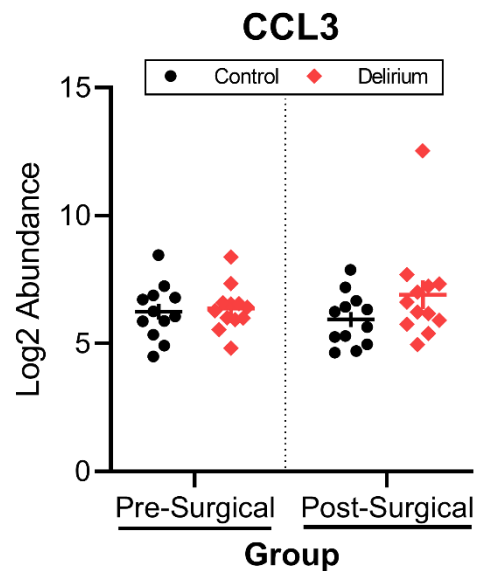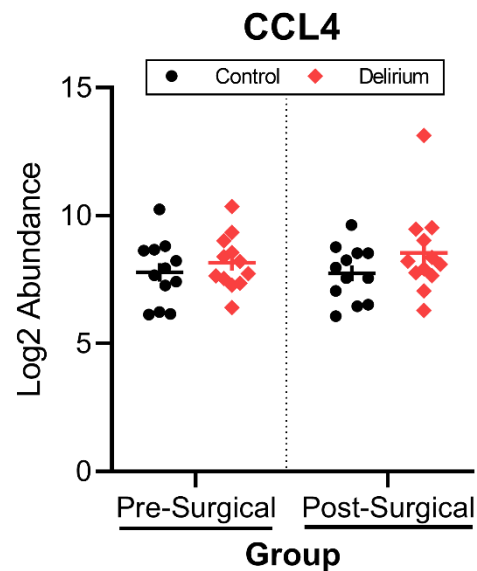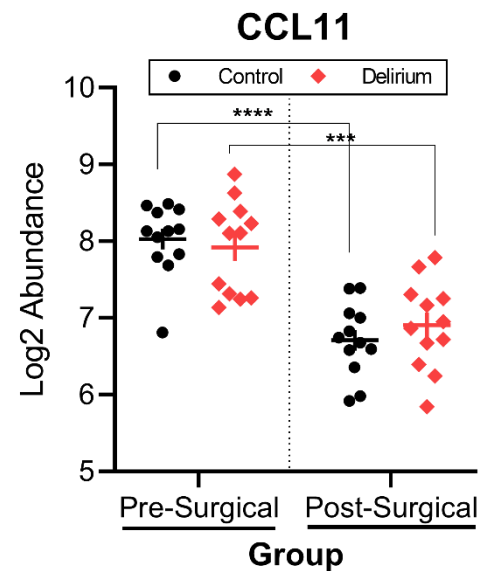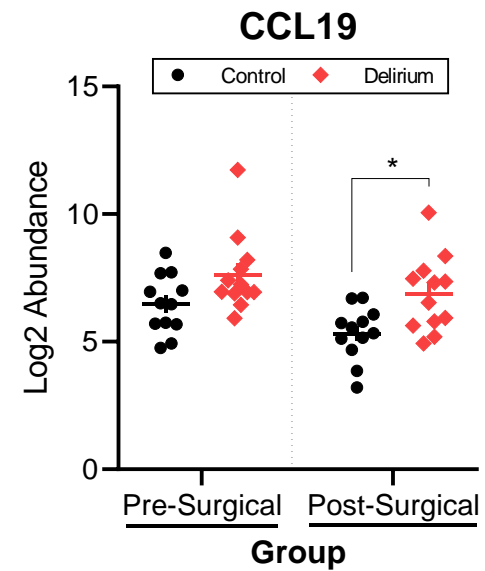

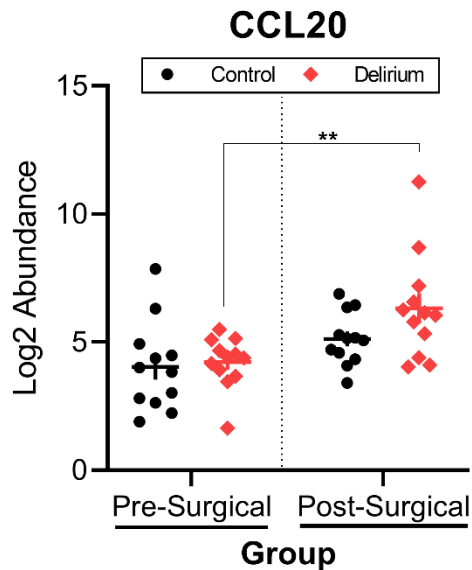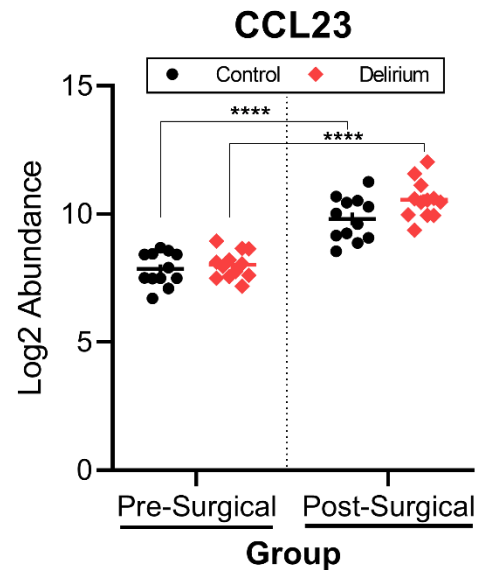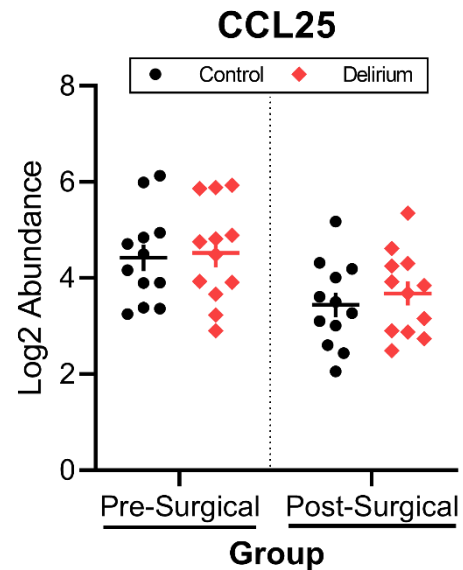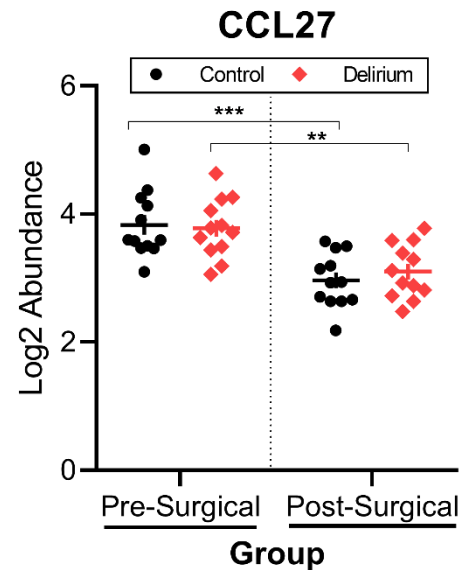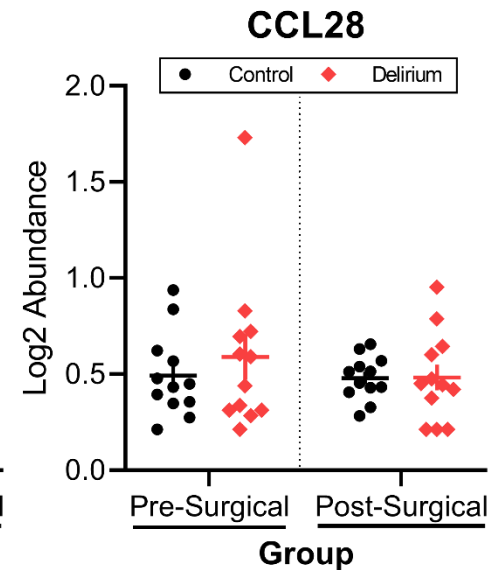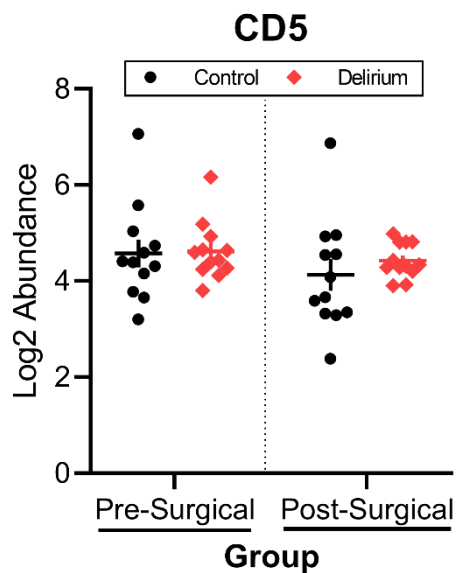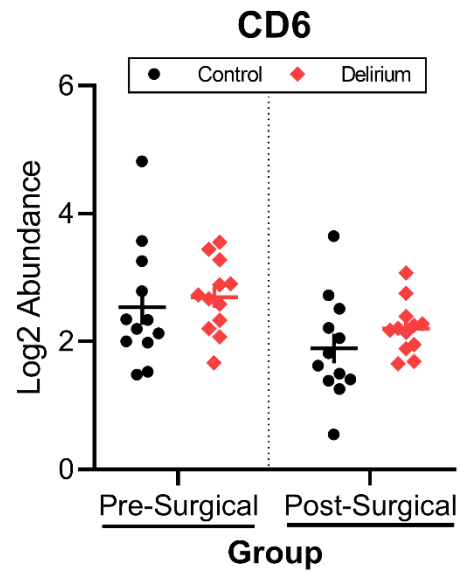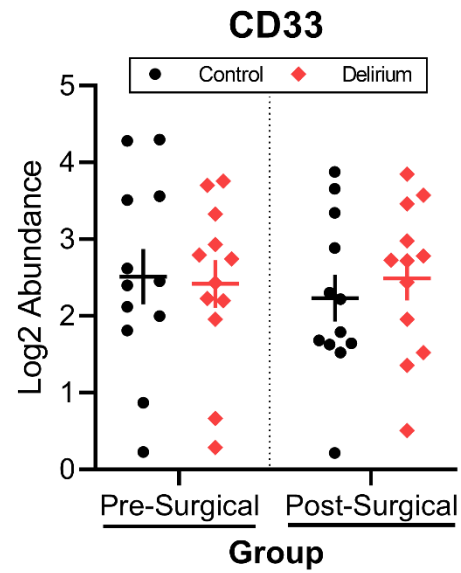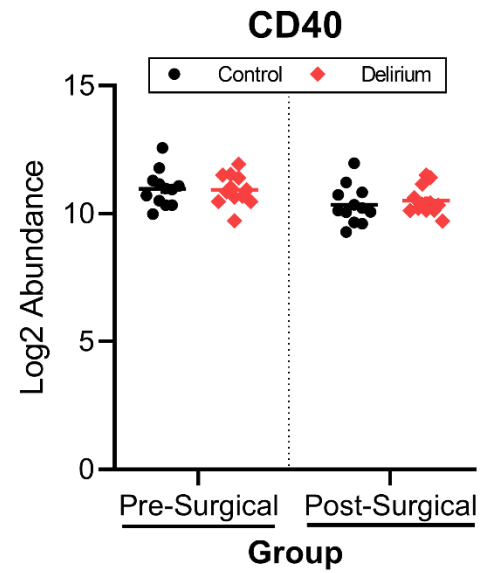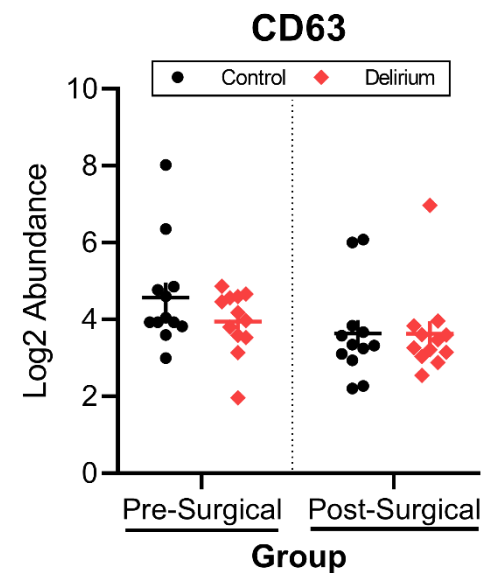



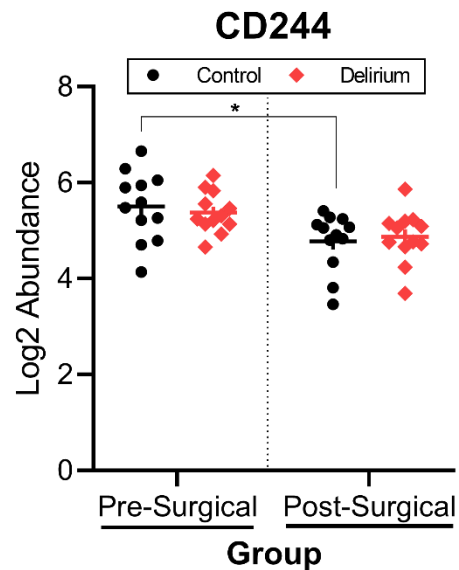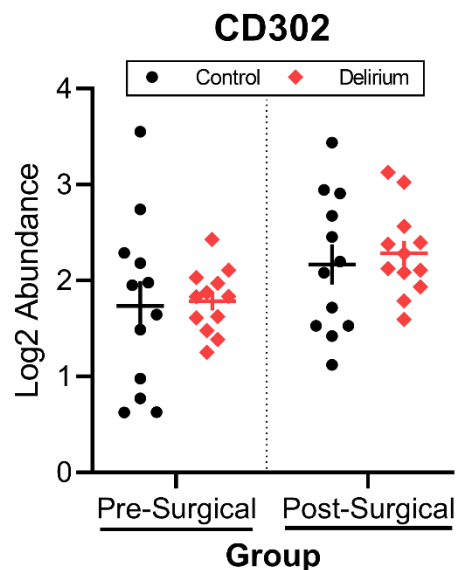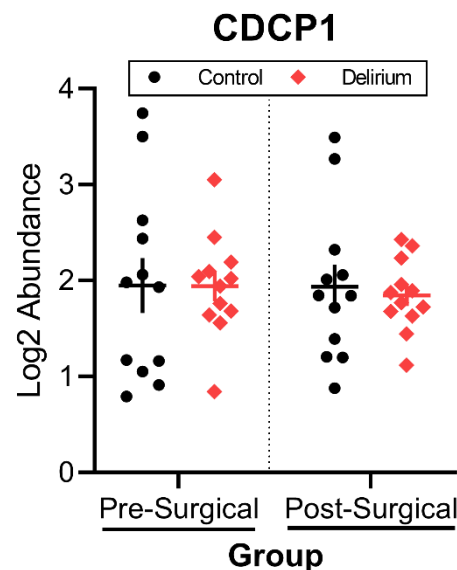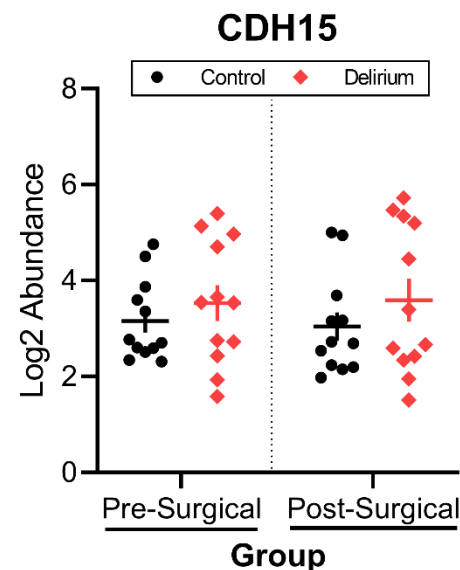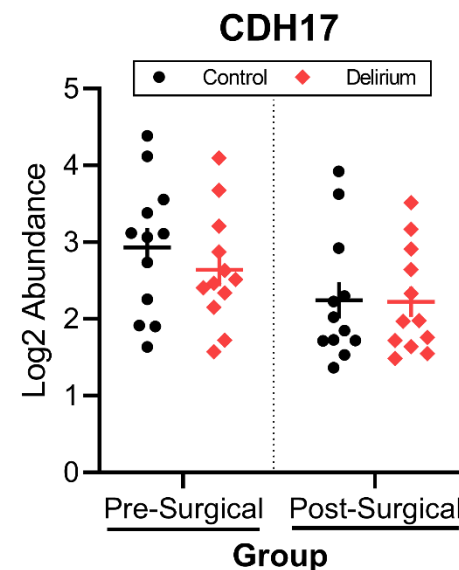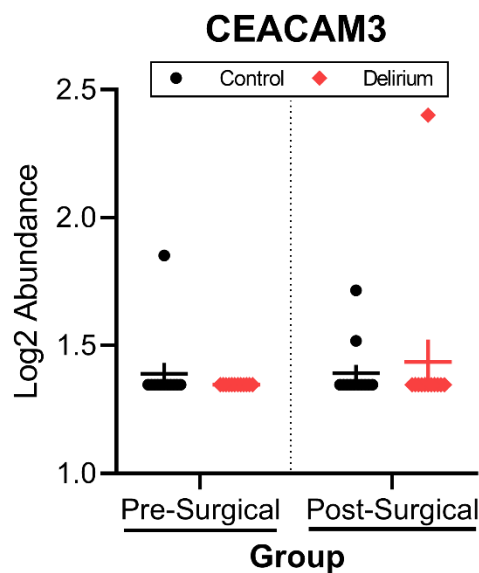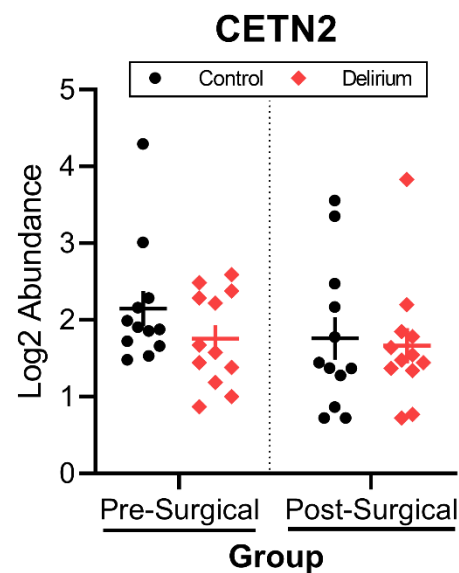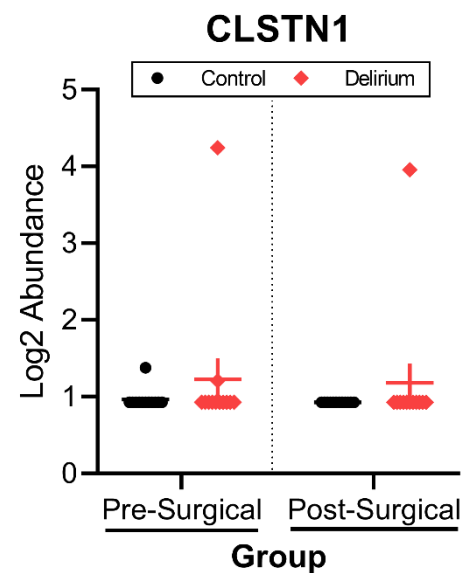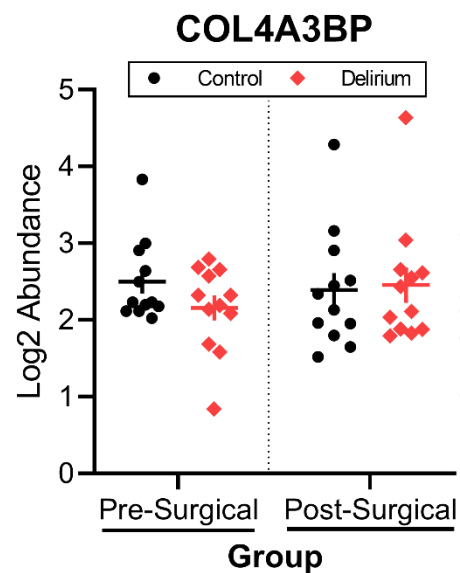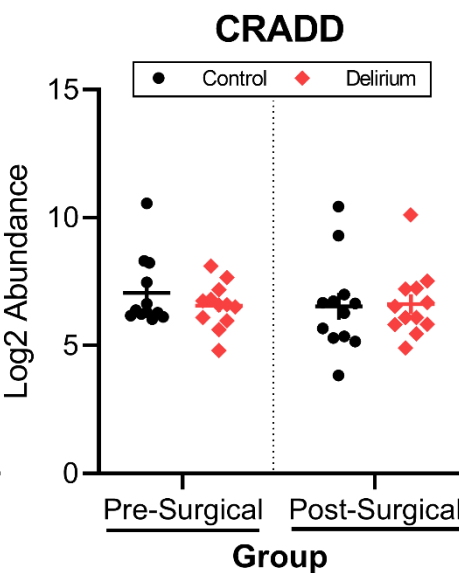

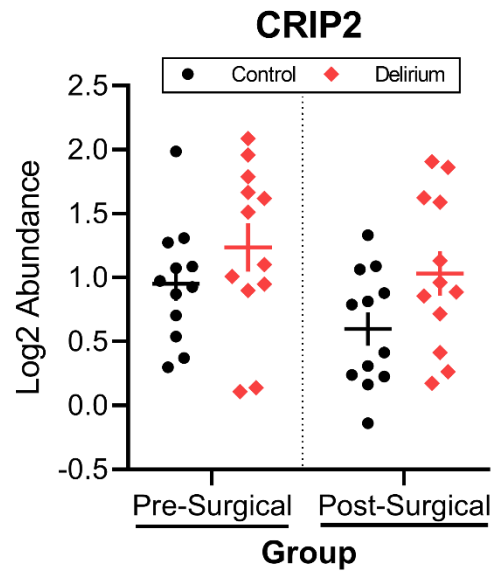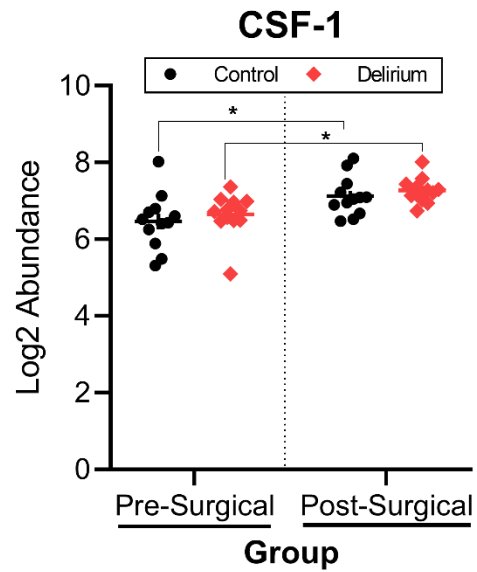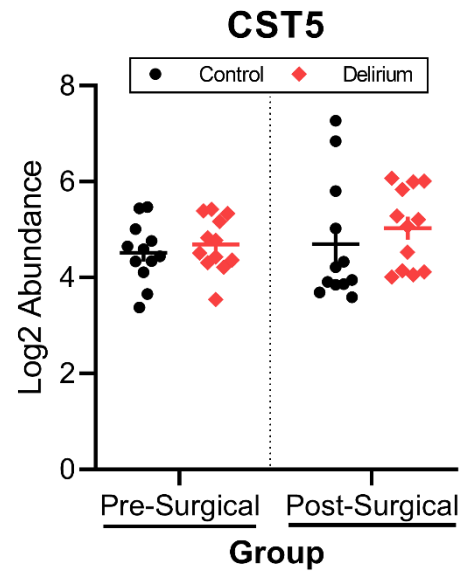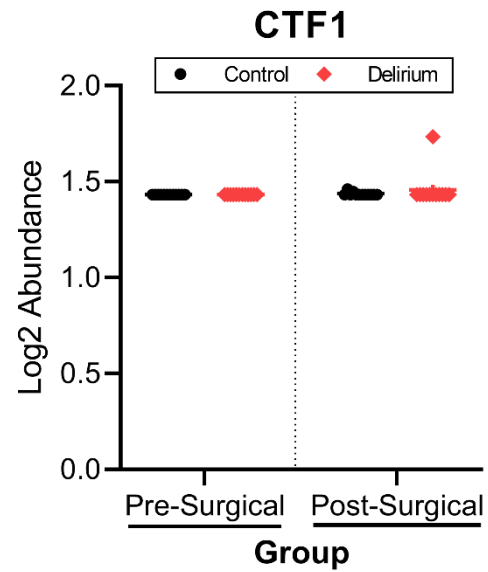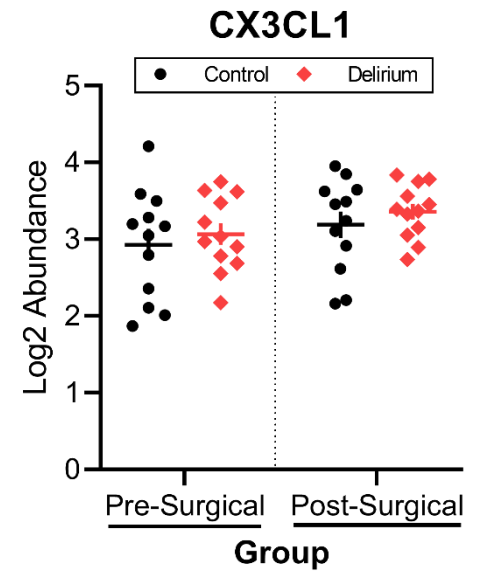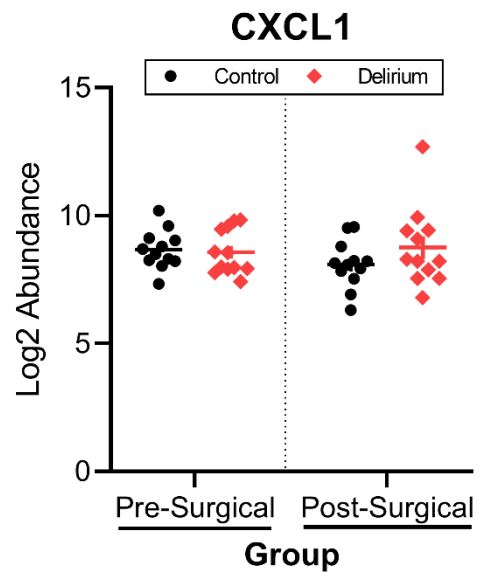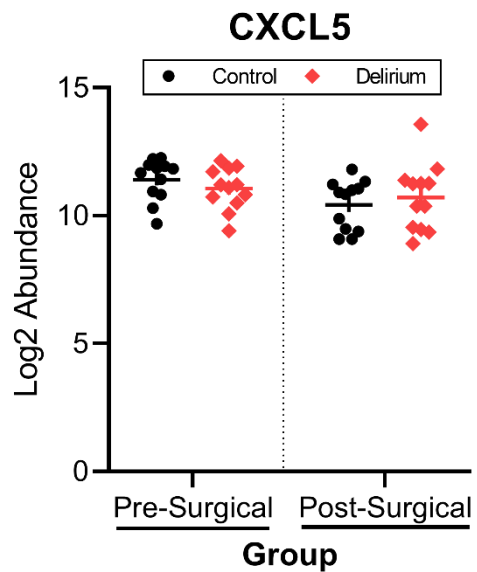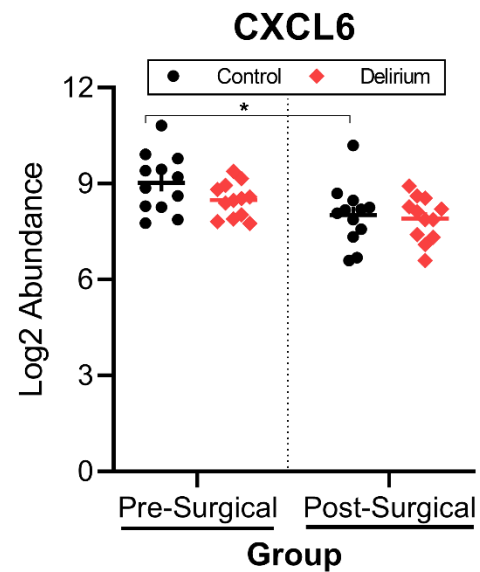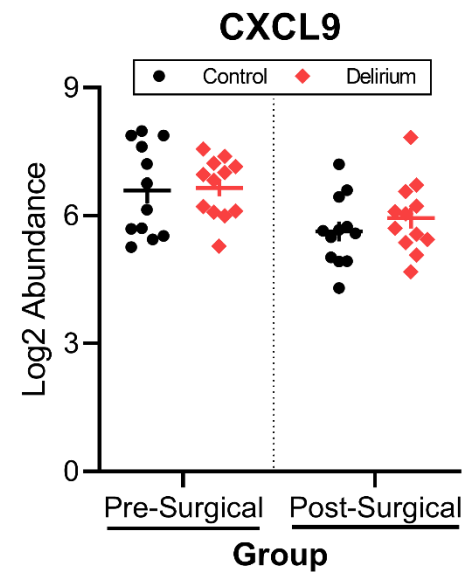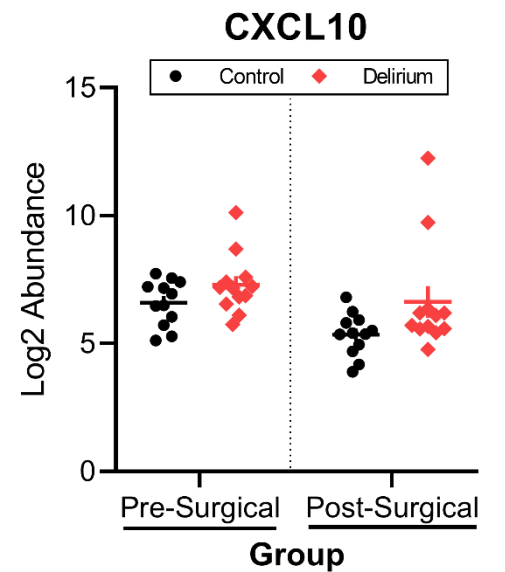

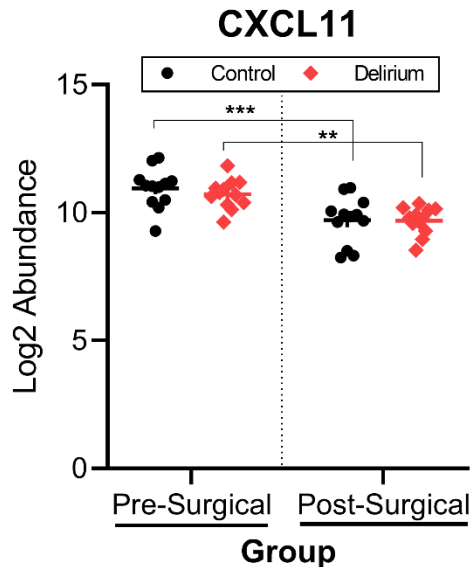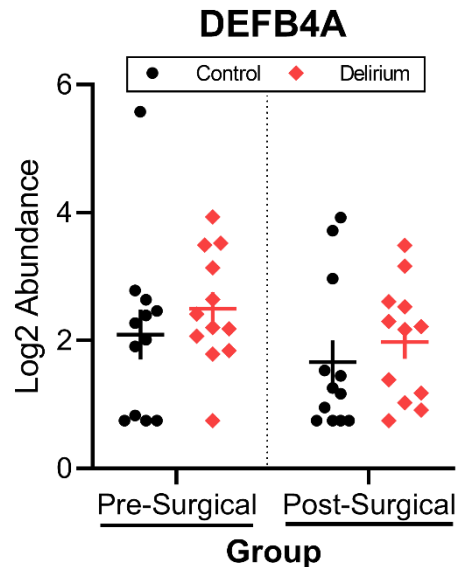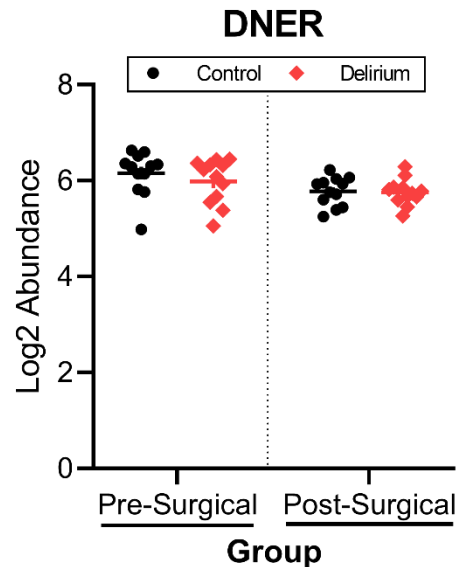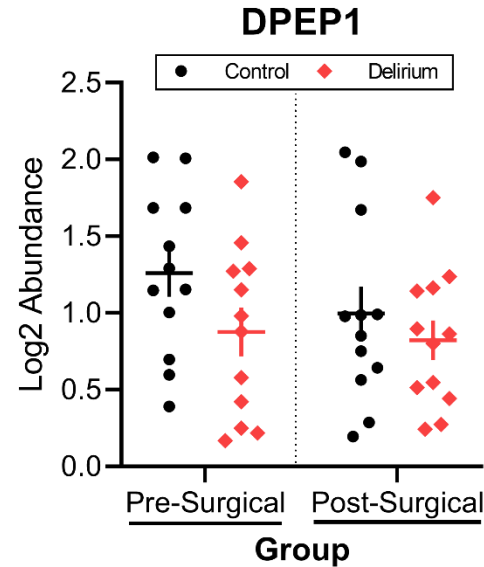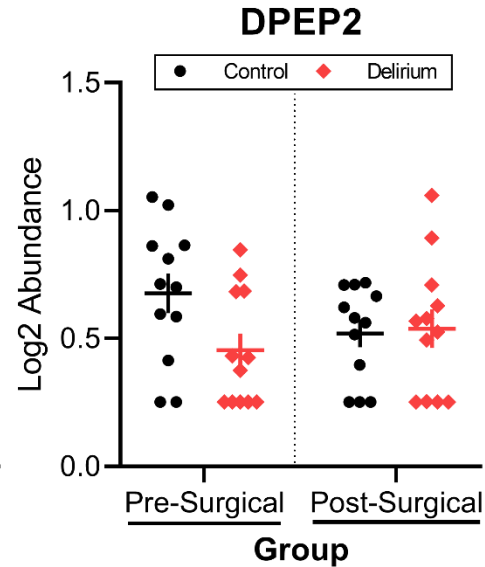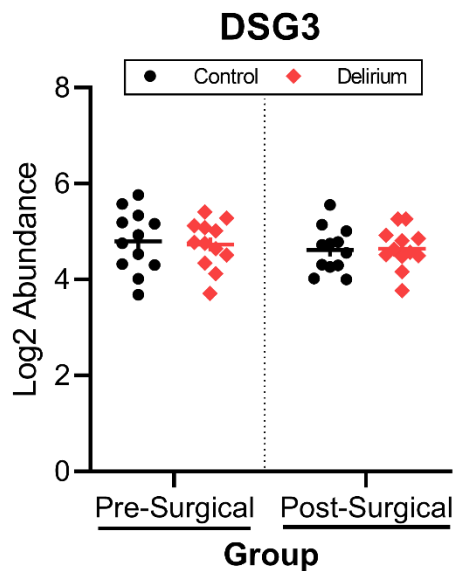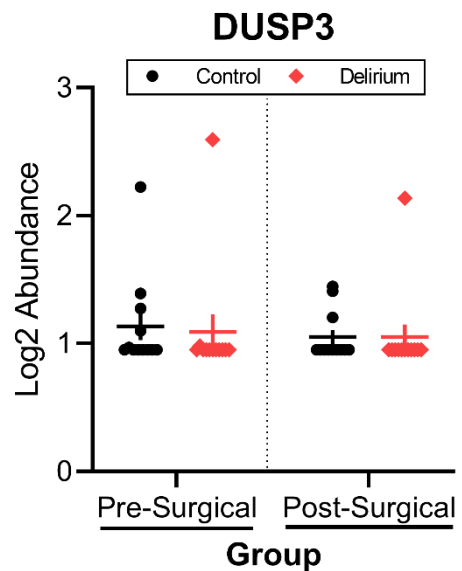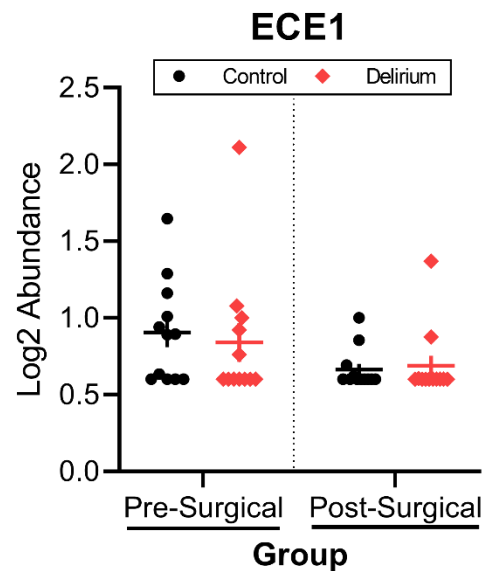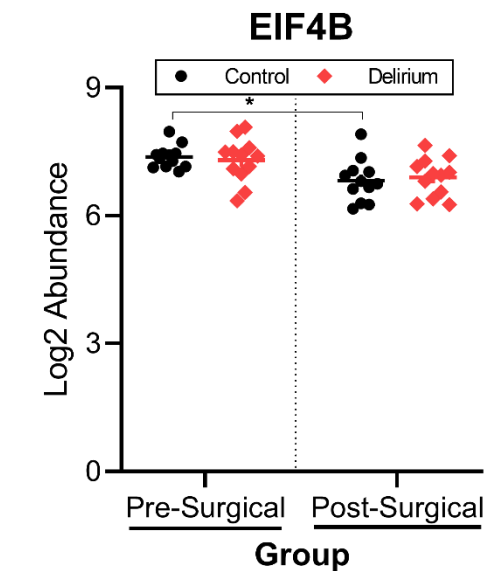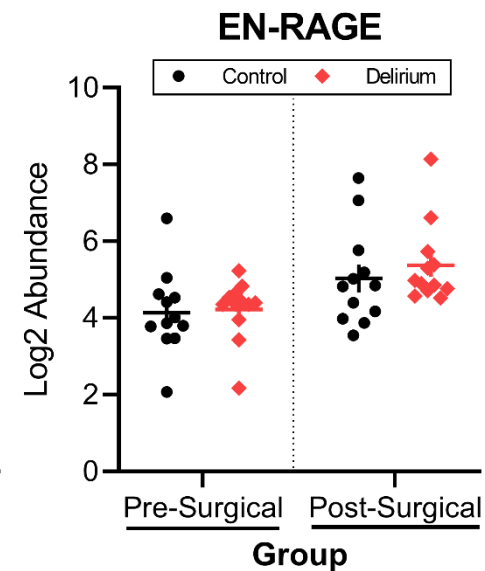

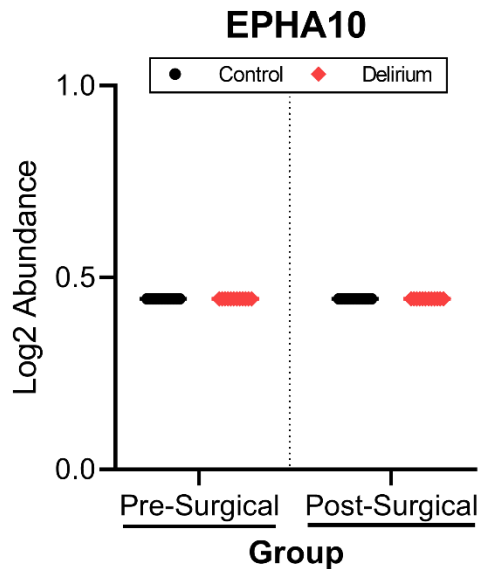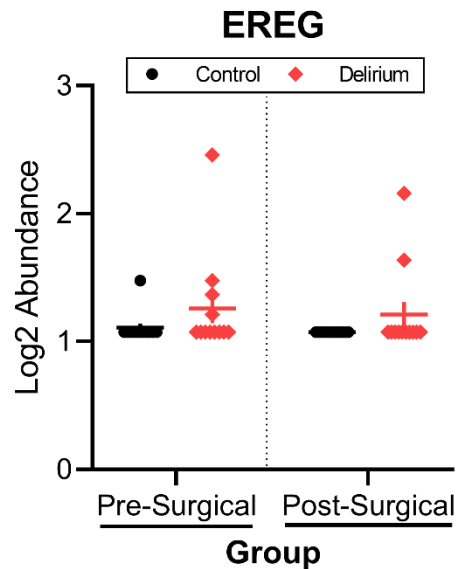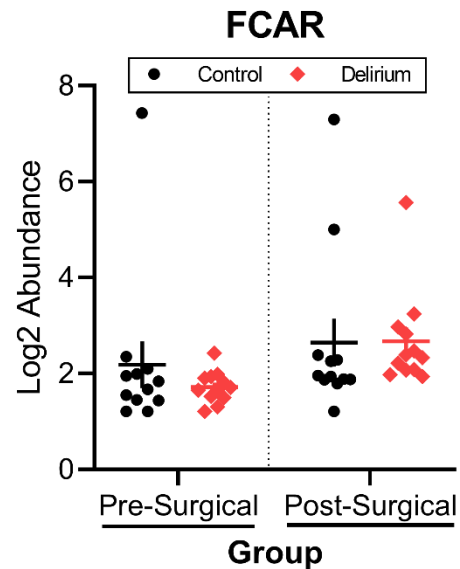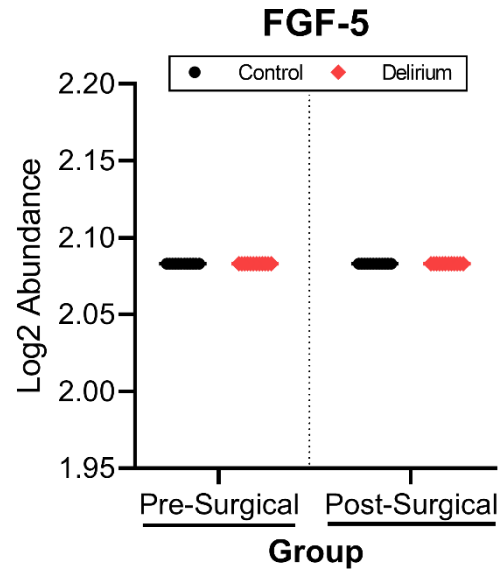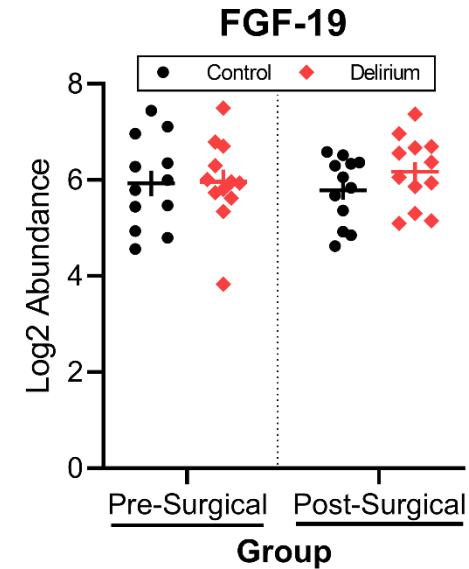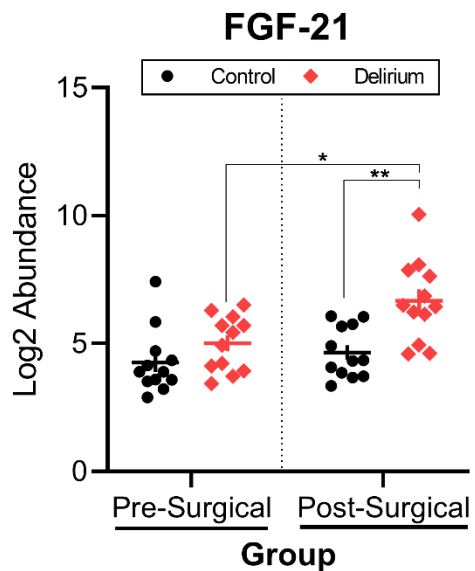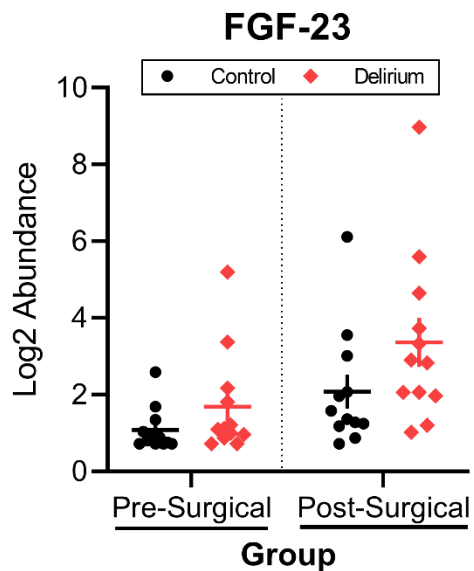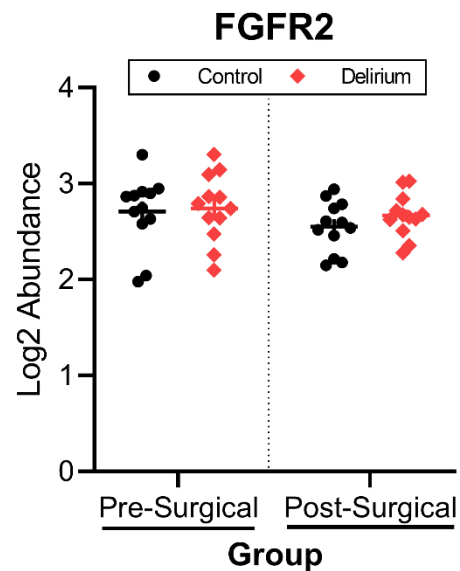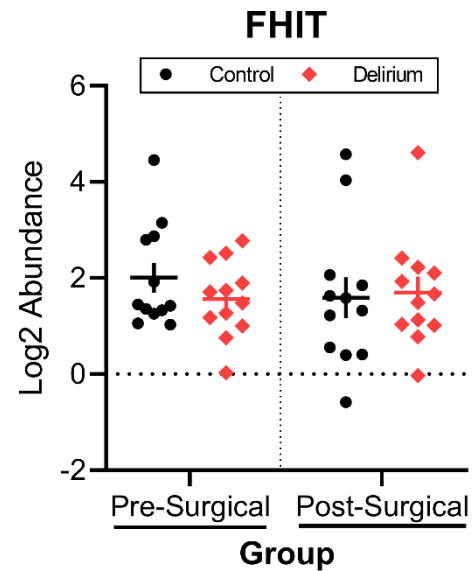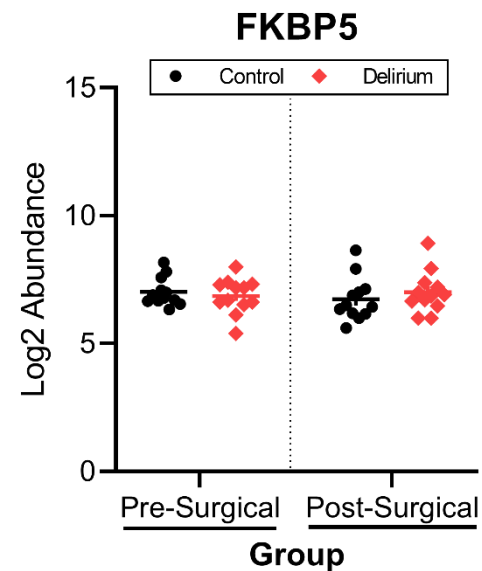

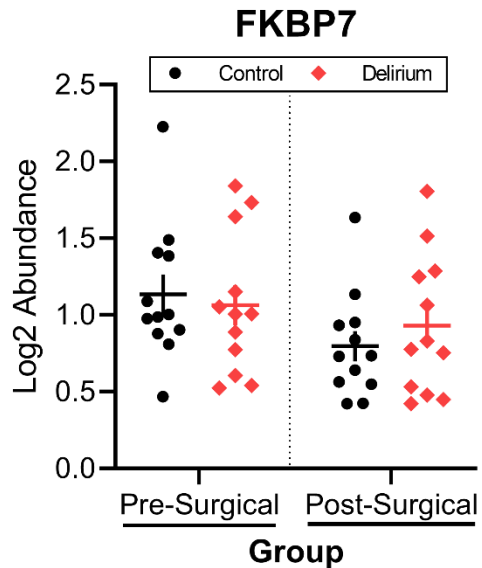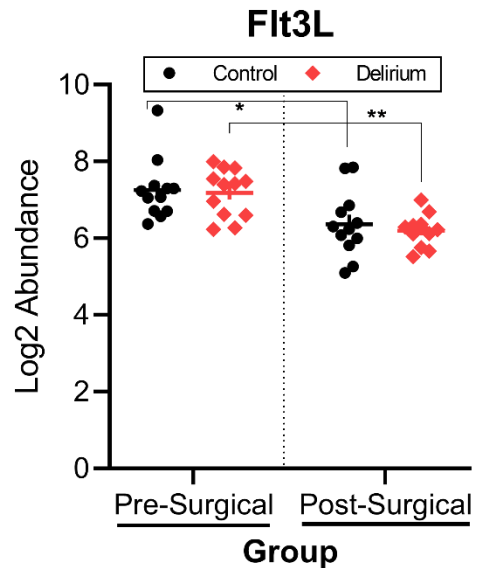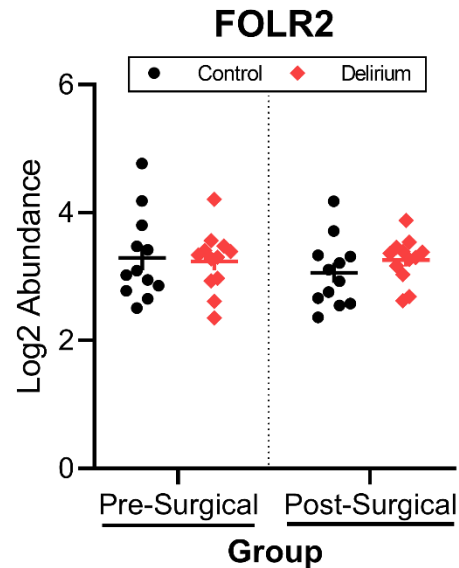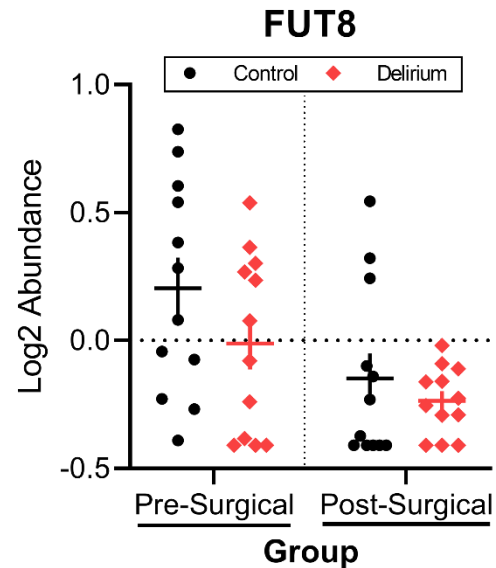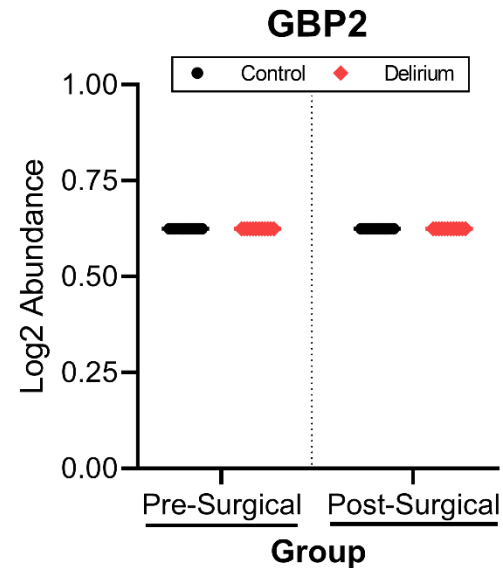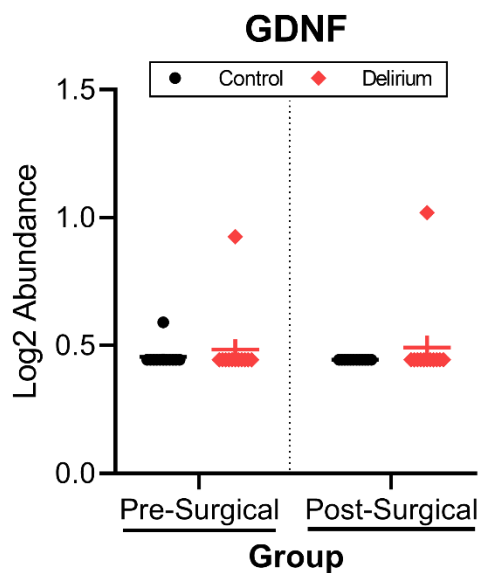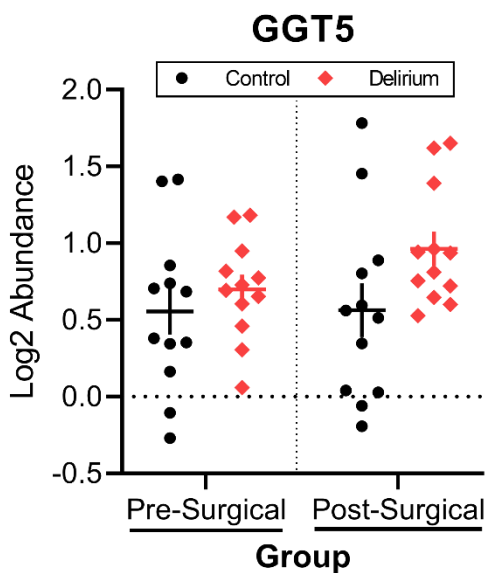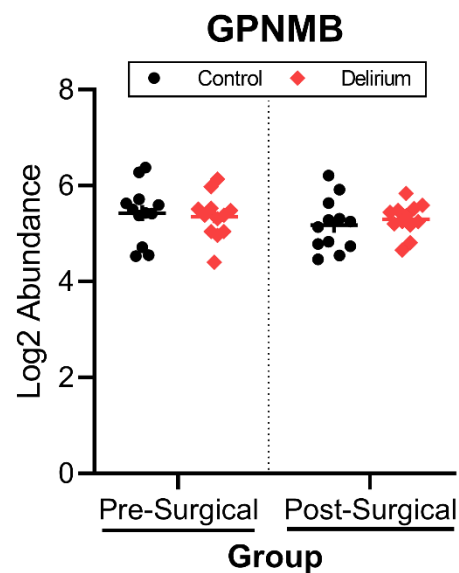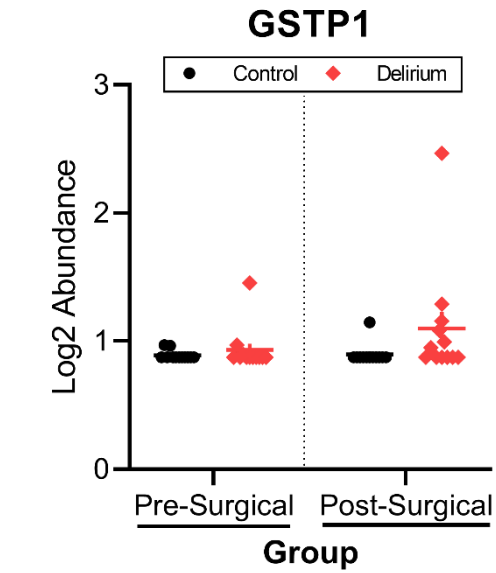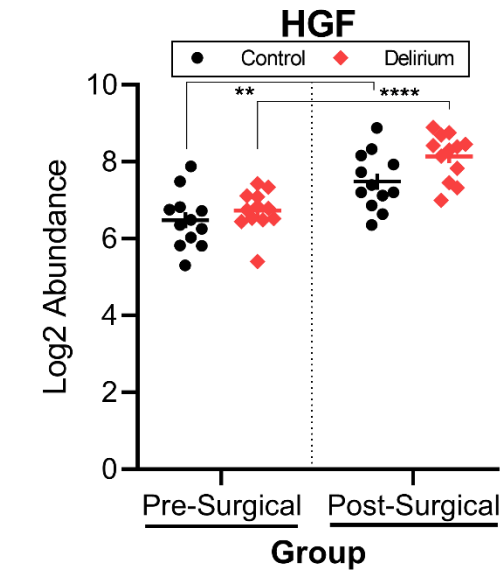

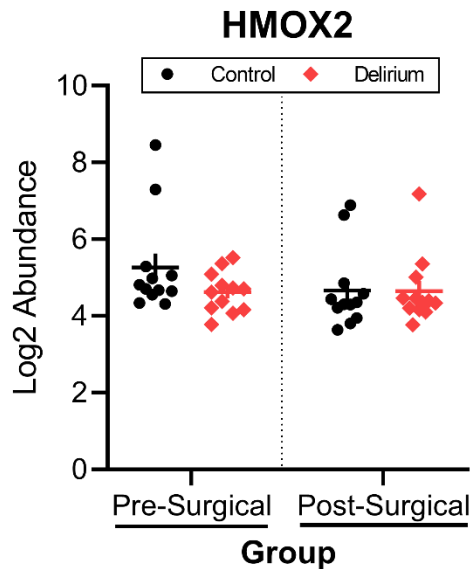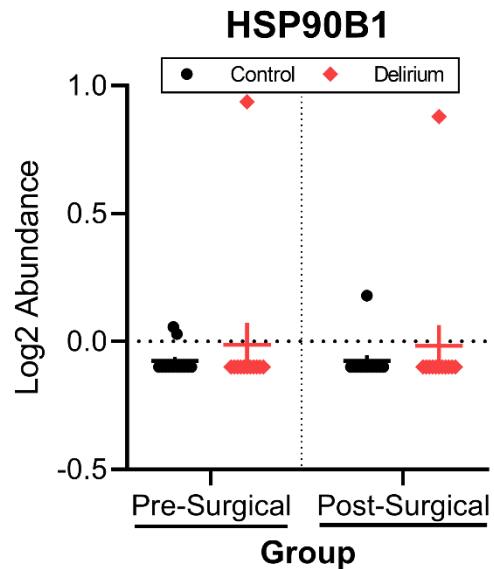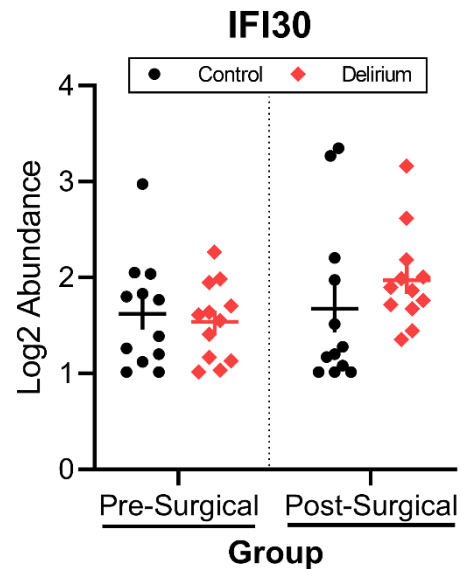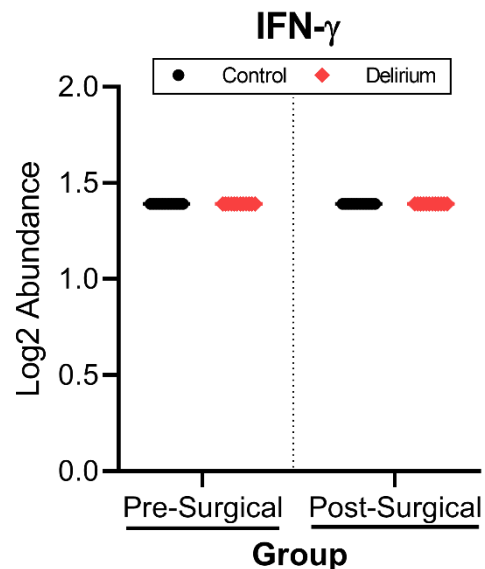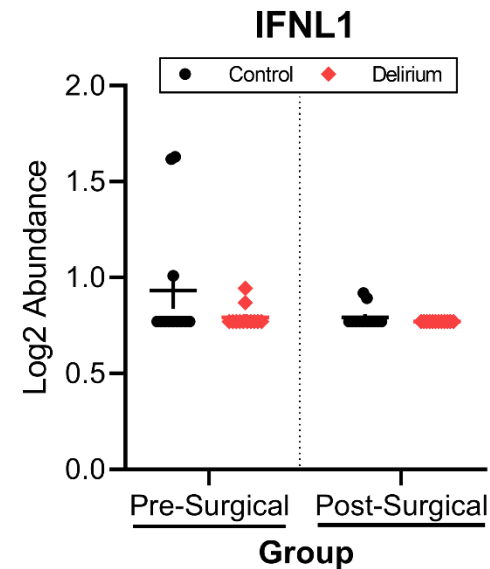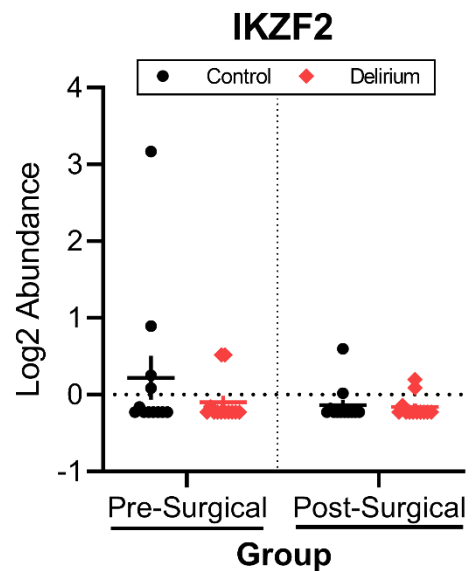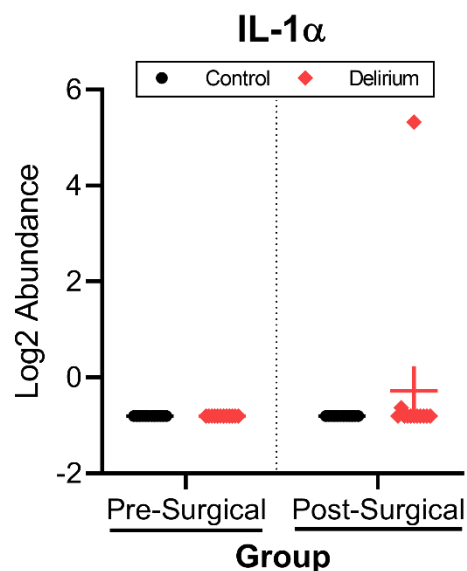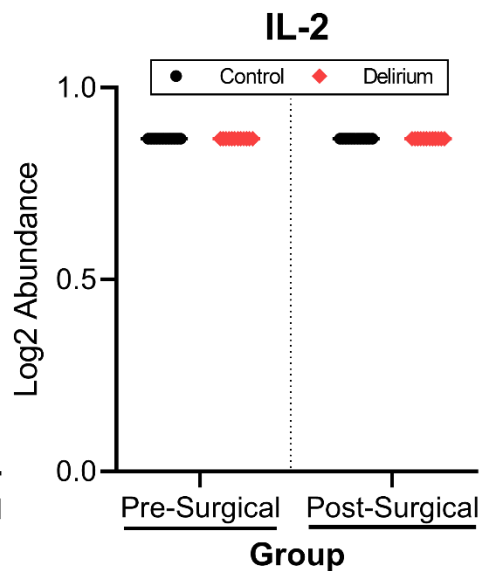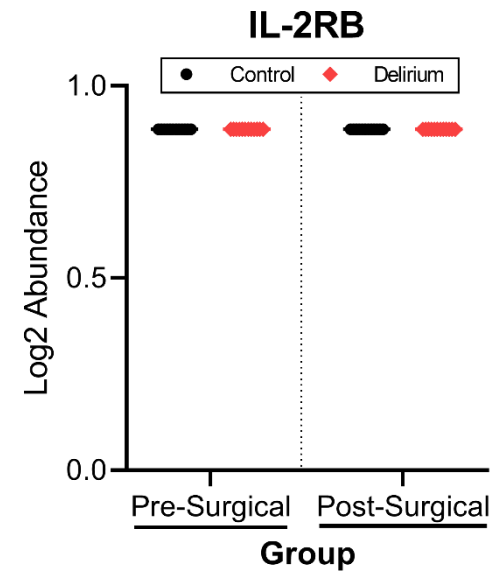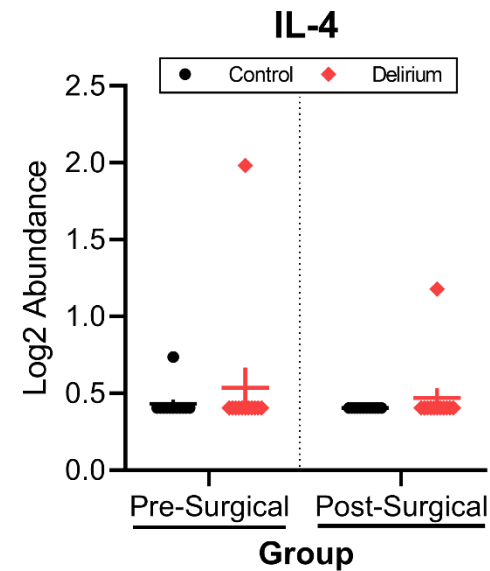

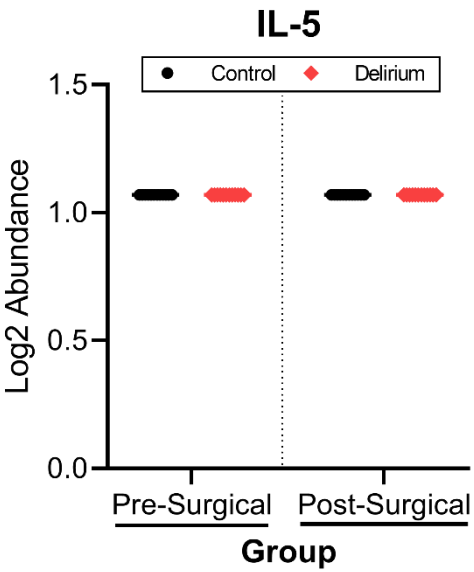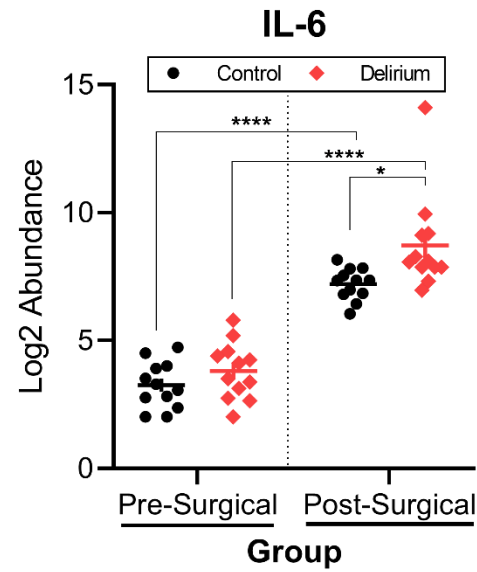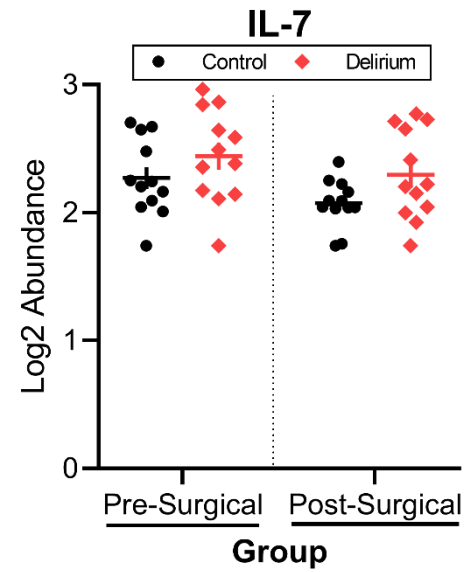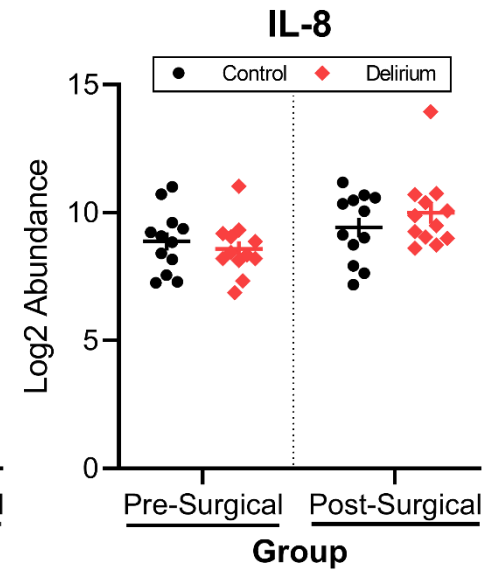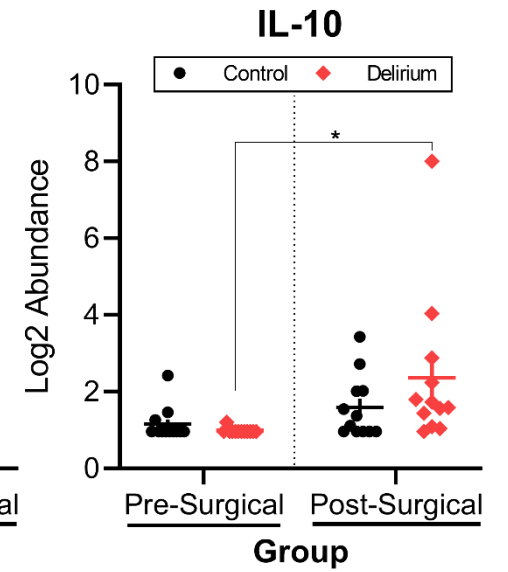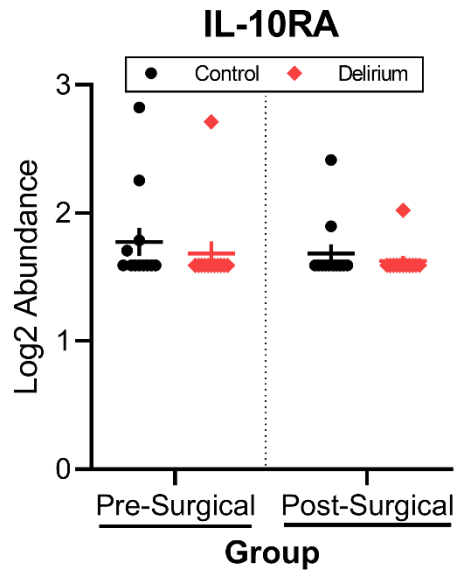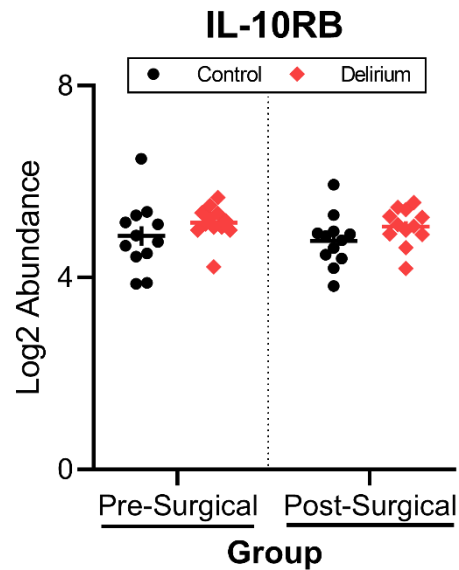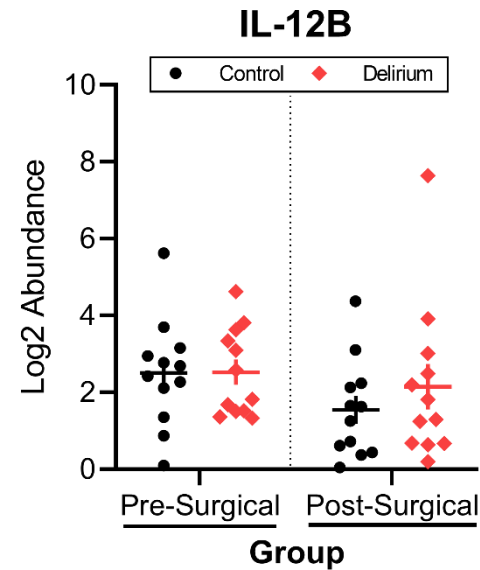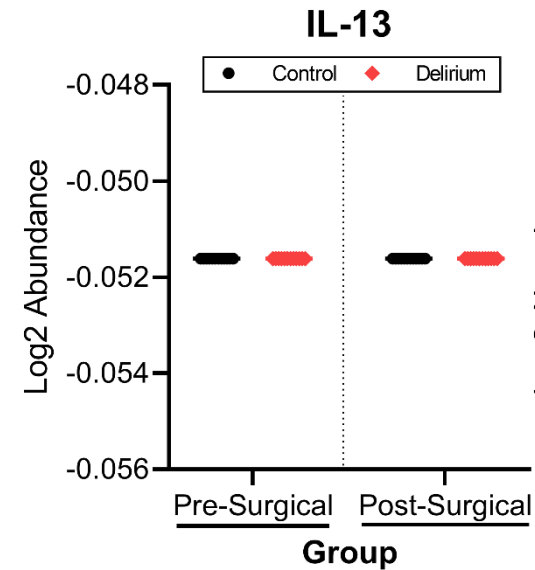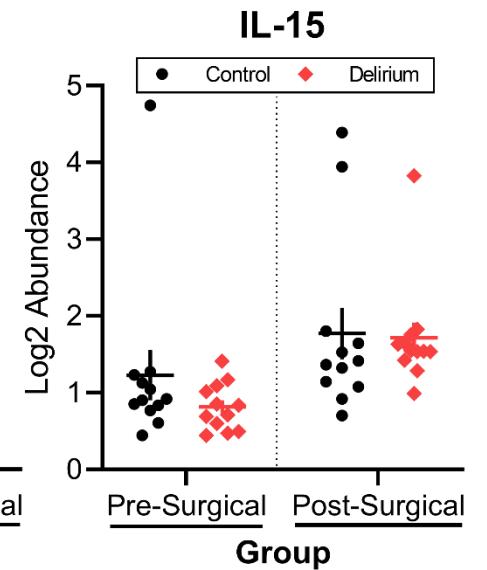

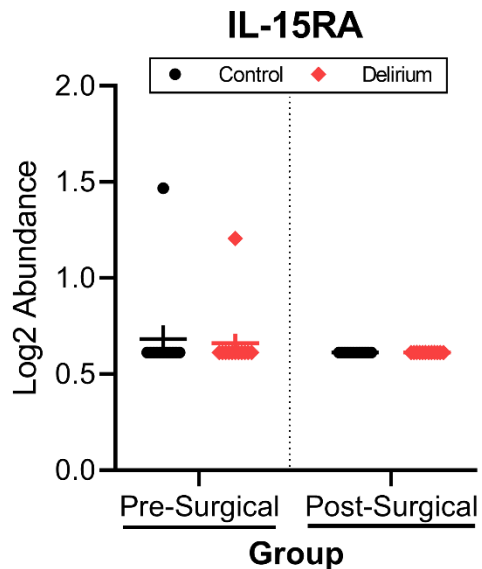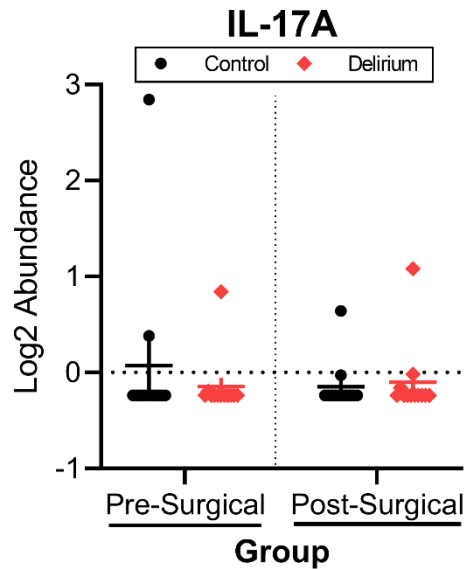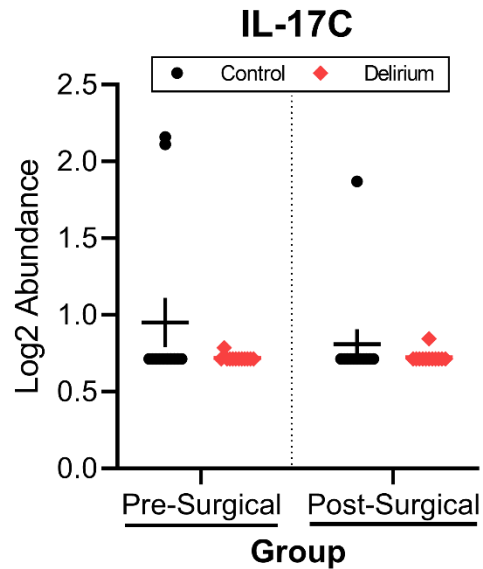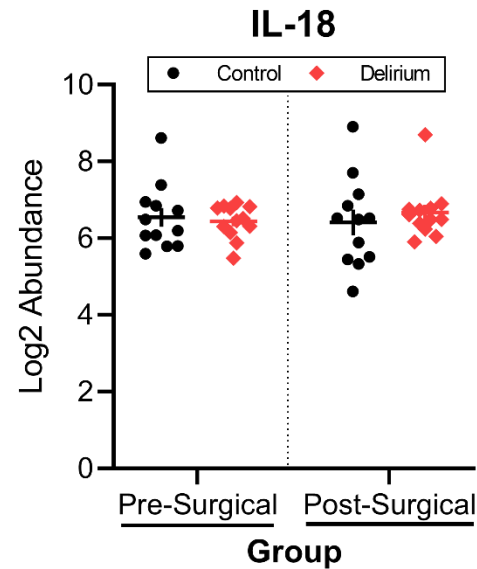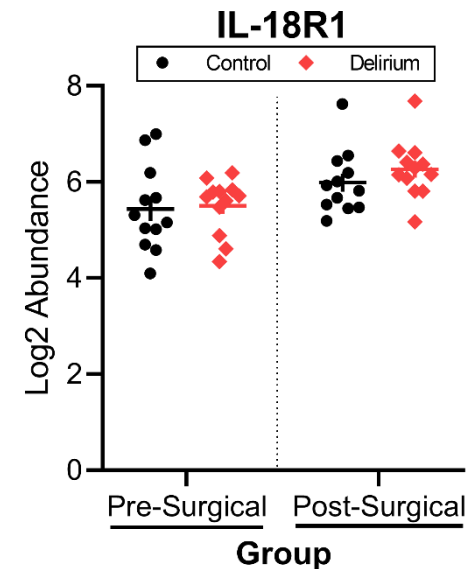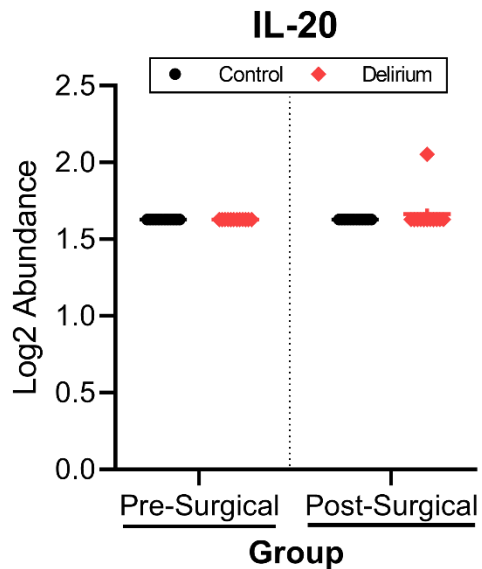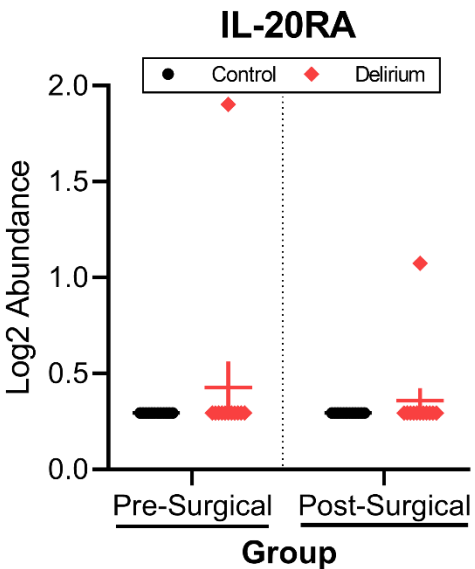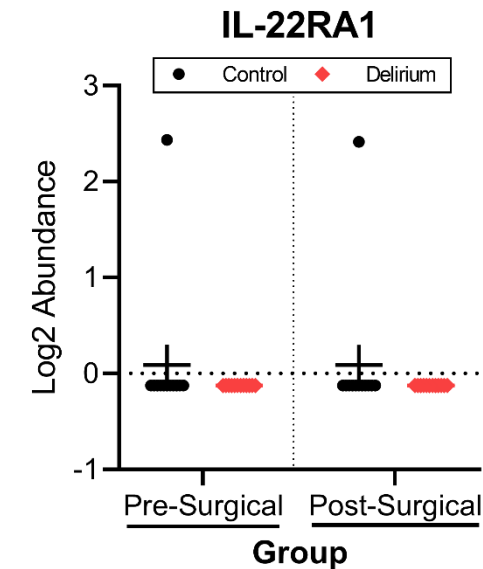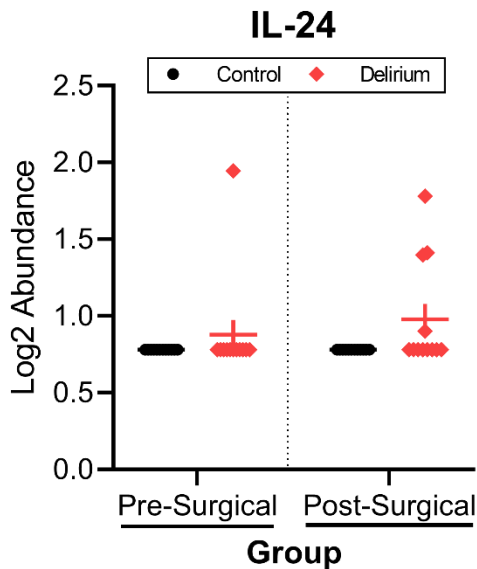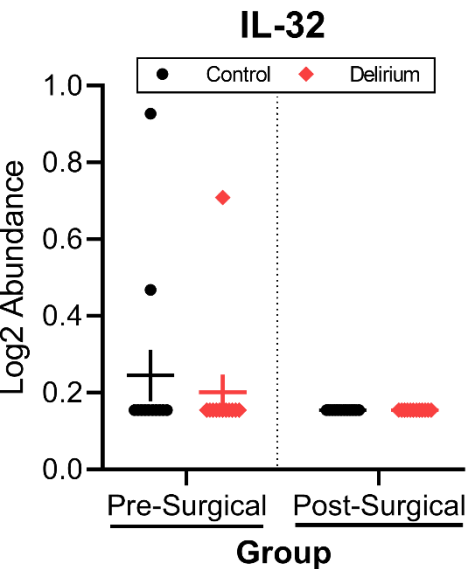



**IL-33**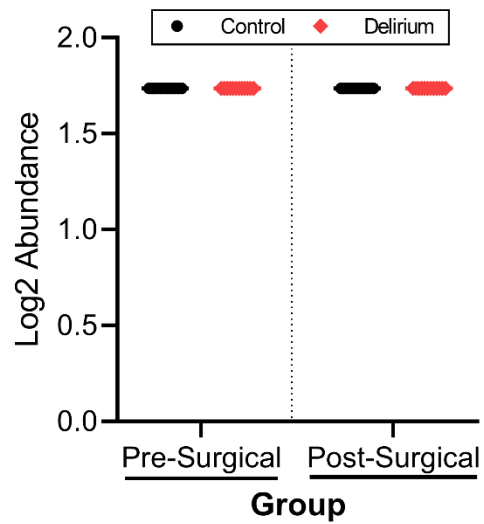**ILKAP**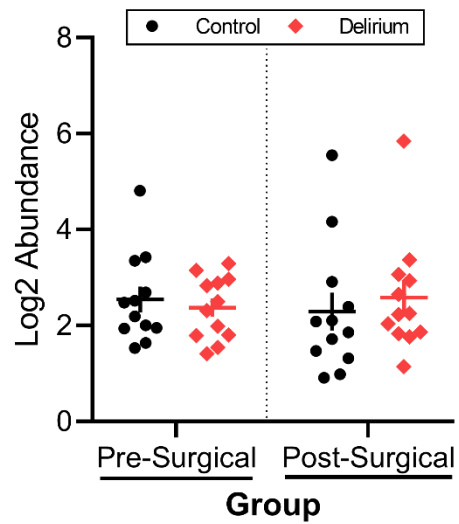**IMPA1**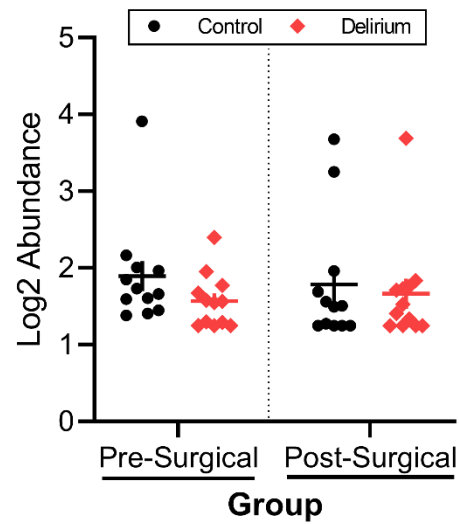**ING1**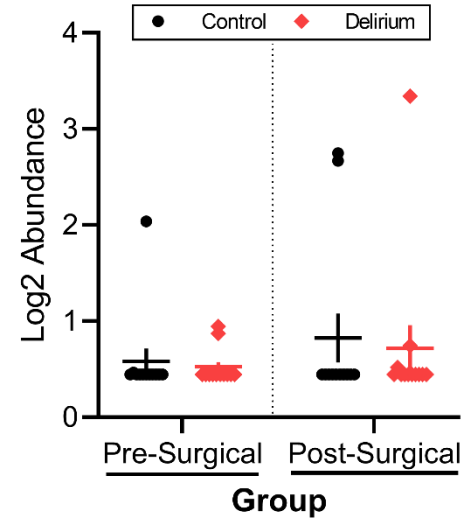**ISLR2**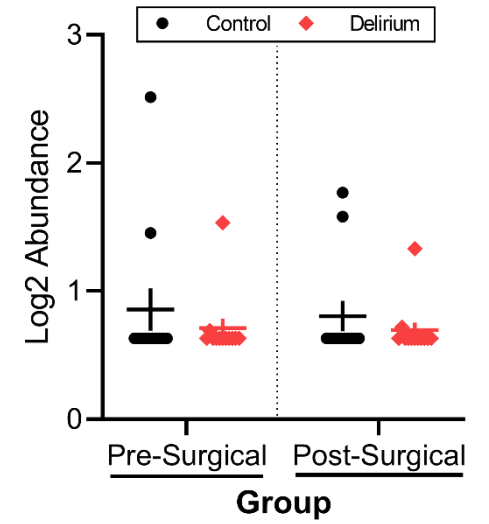**KIF1BP**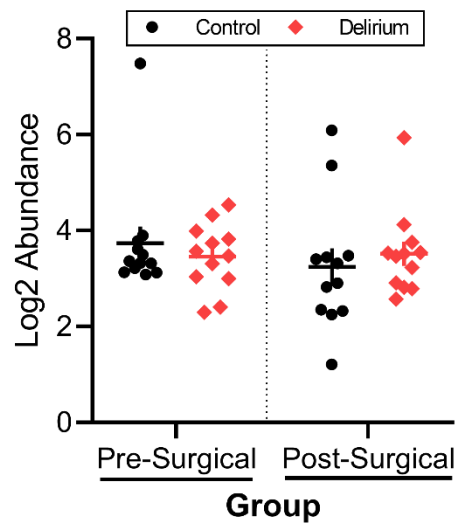**KIR2DL3**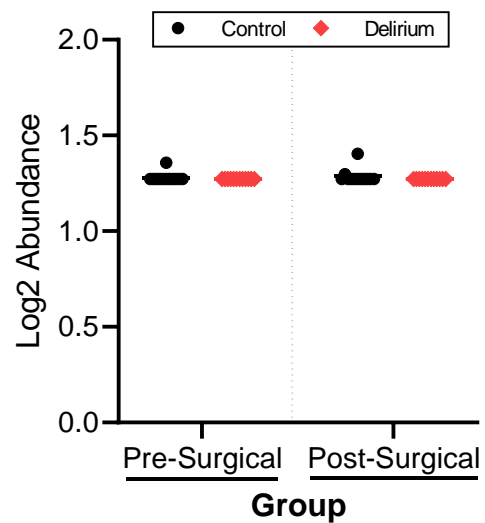**KIRREL2**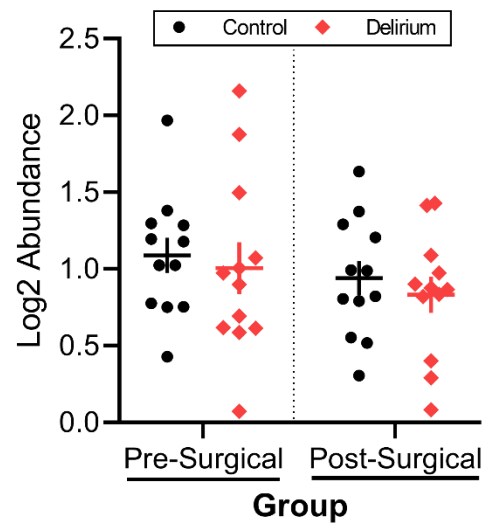**KLB**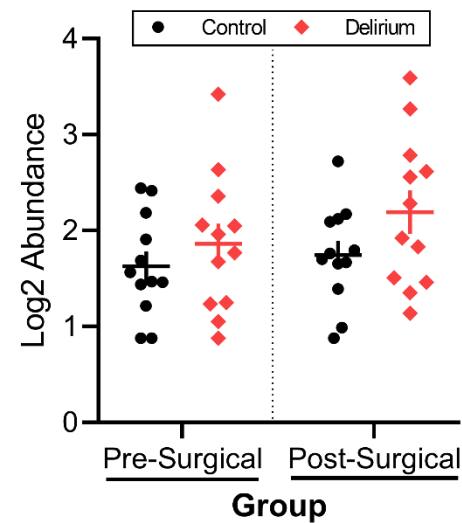**LAP-TGF- $\beta$ 1**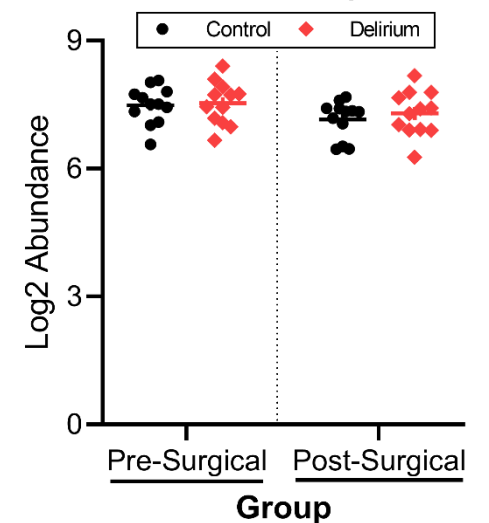

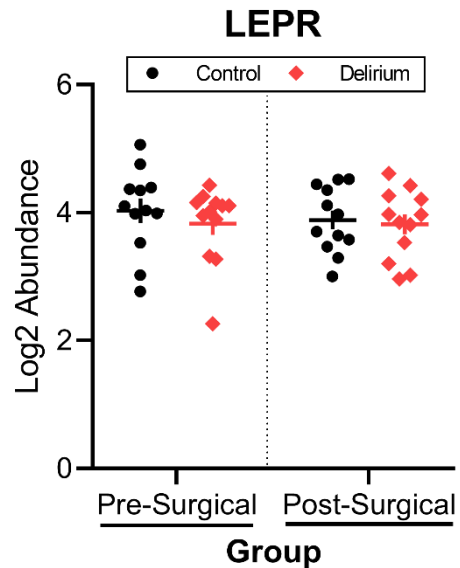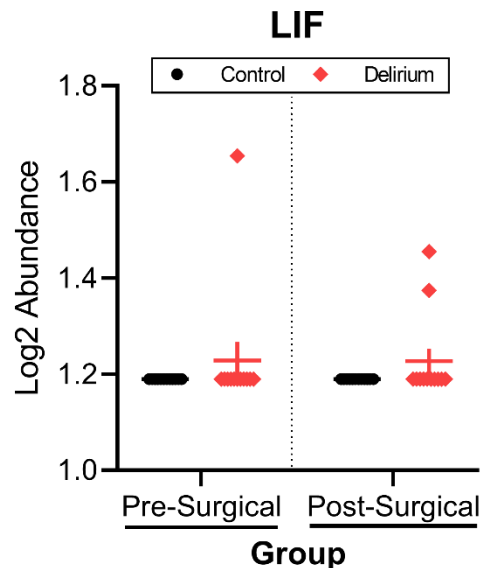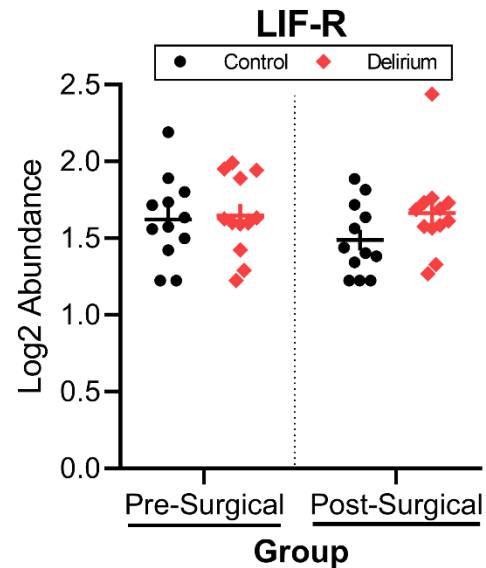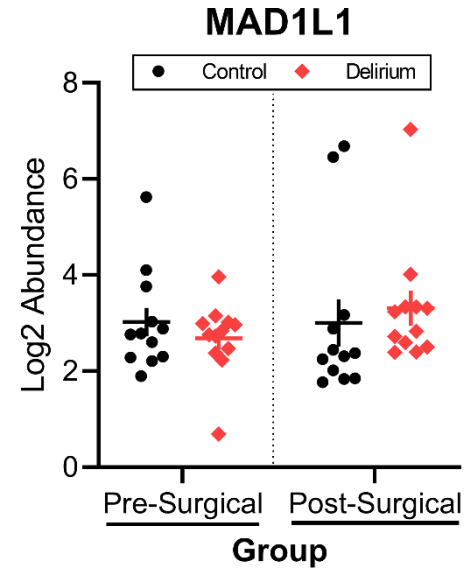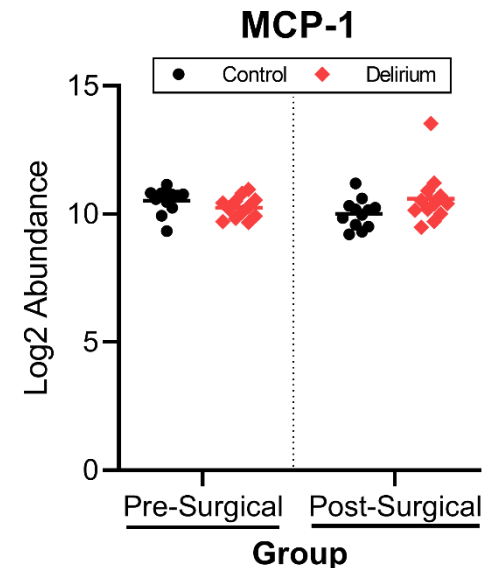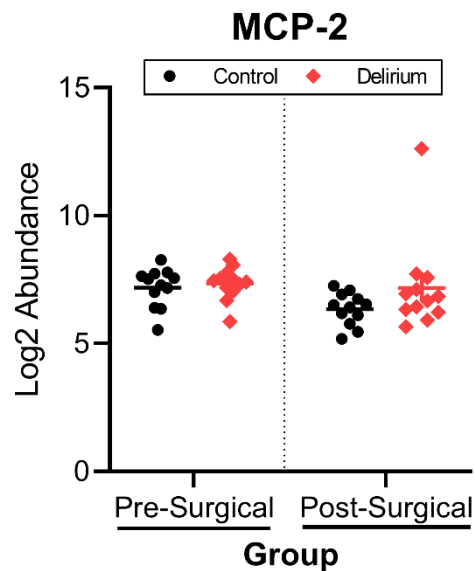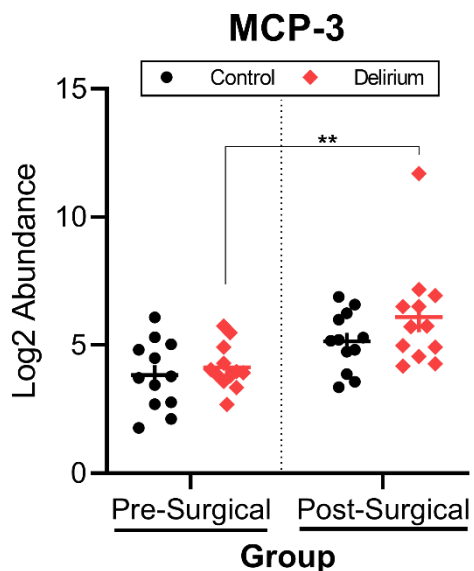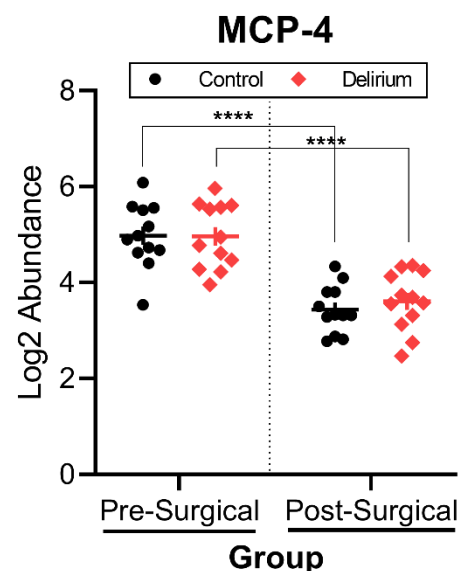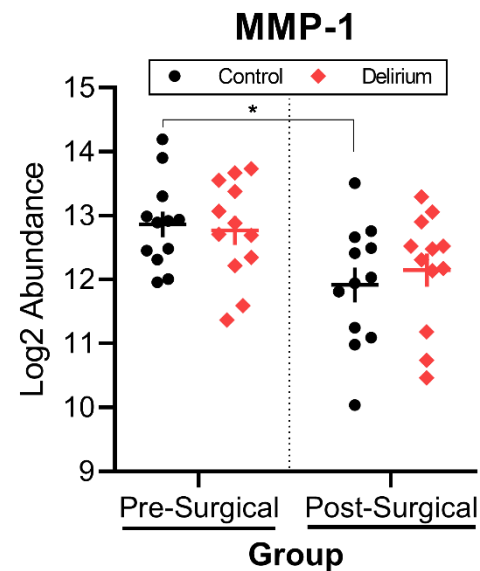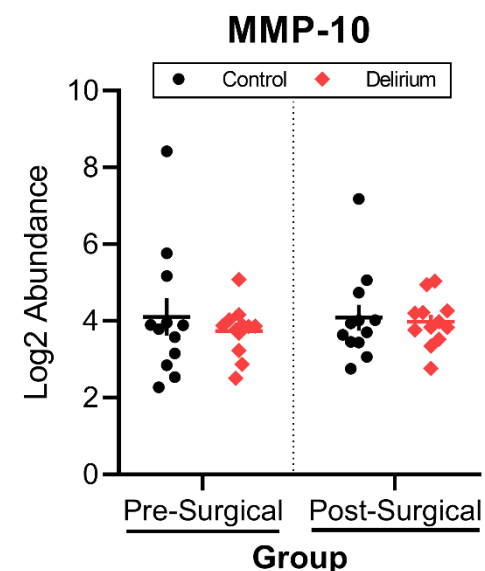

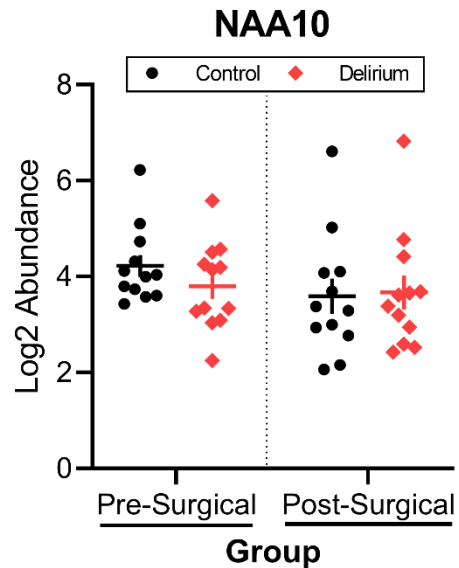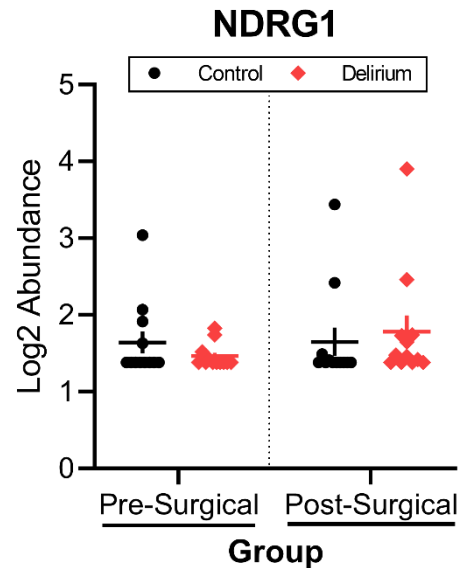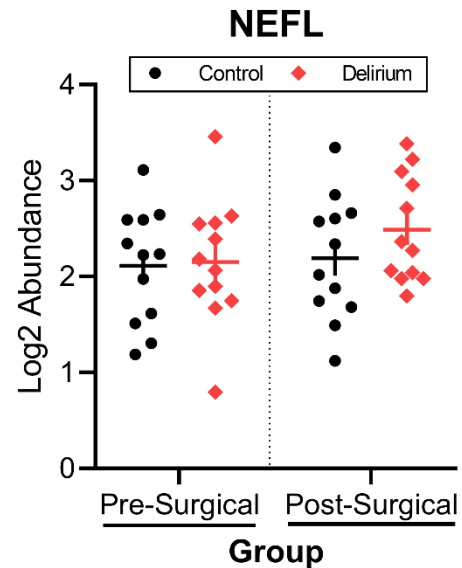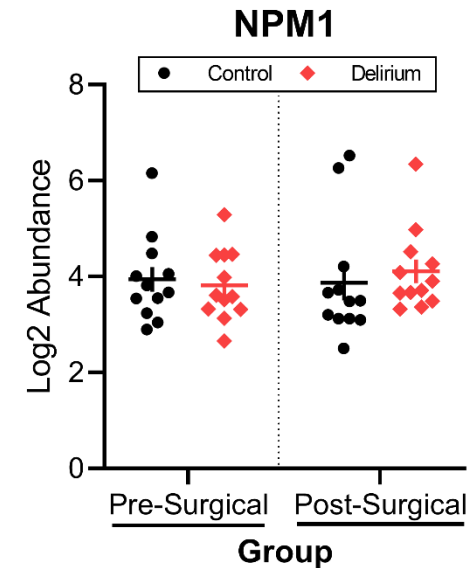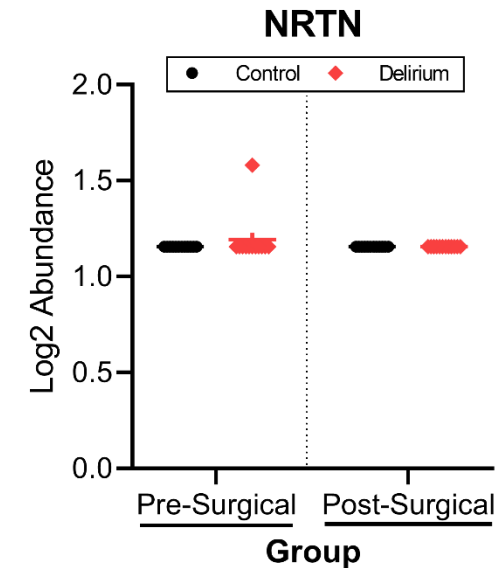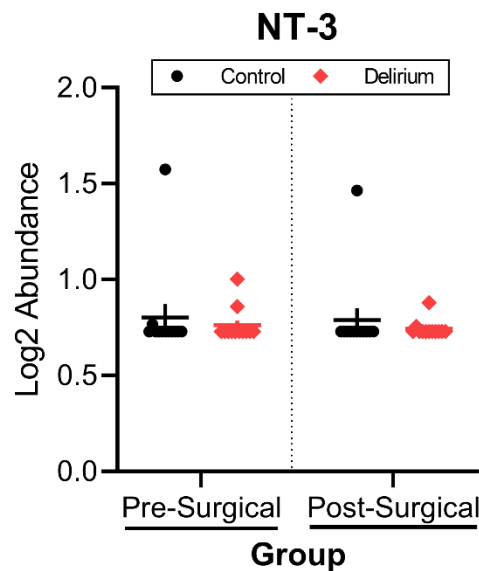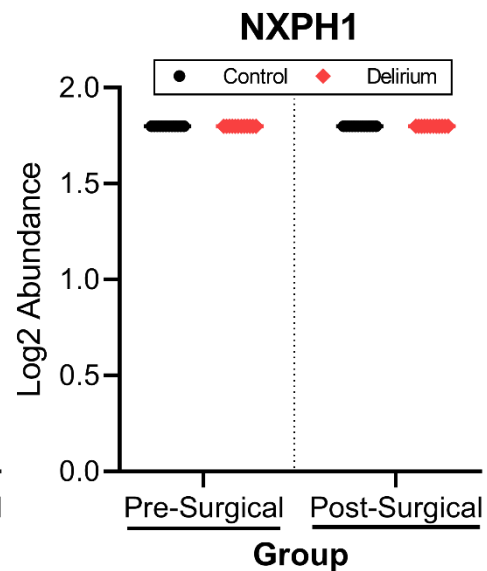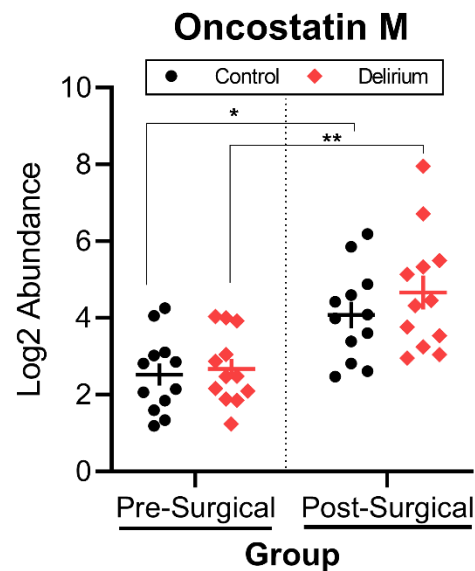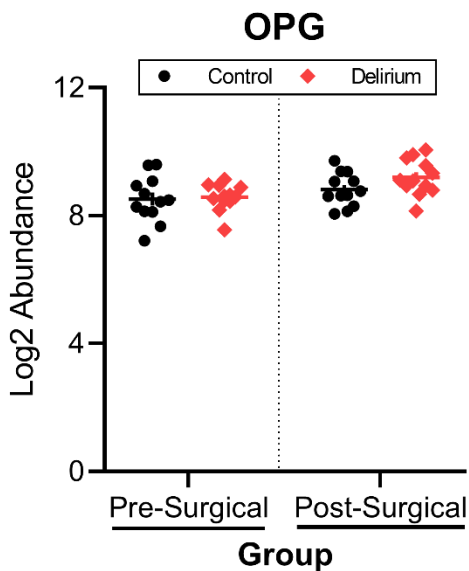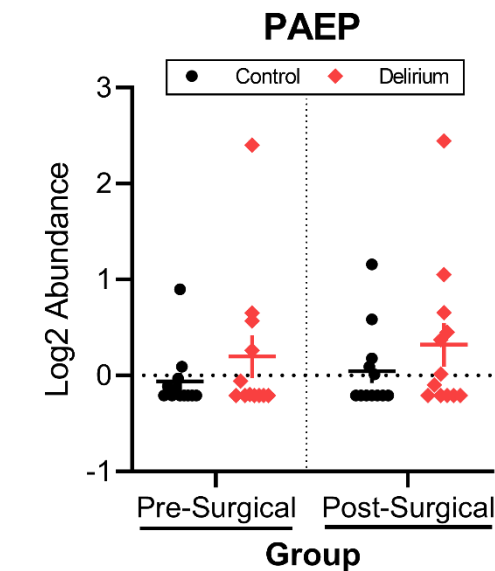

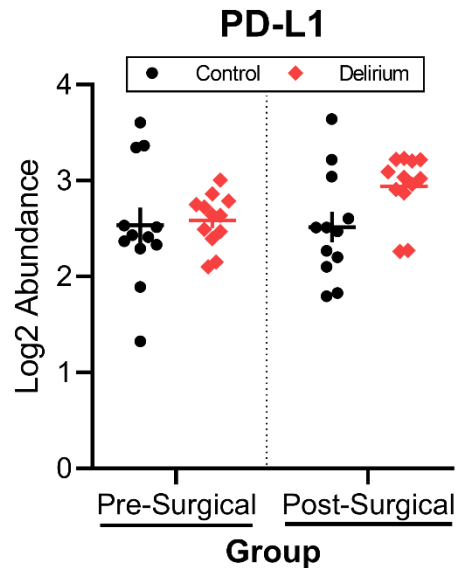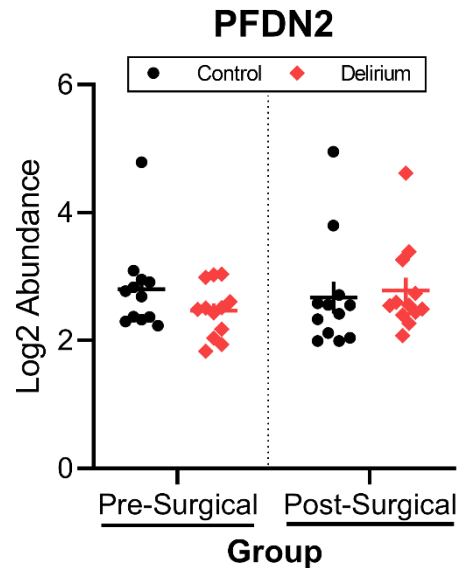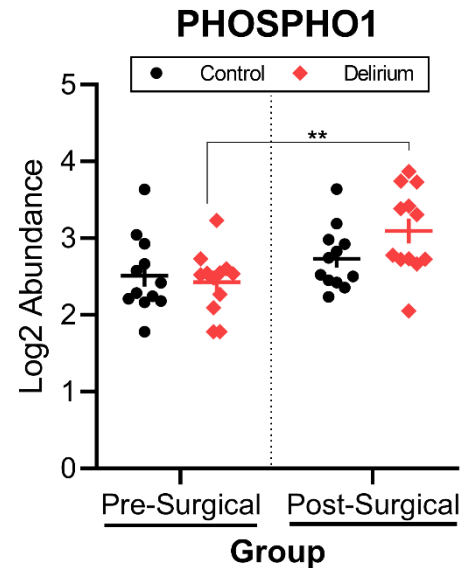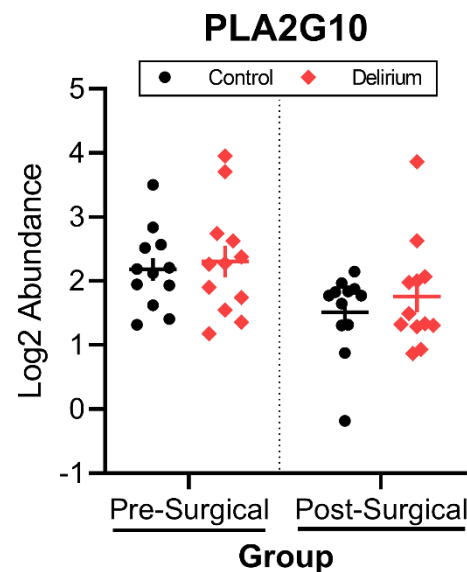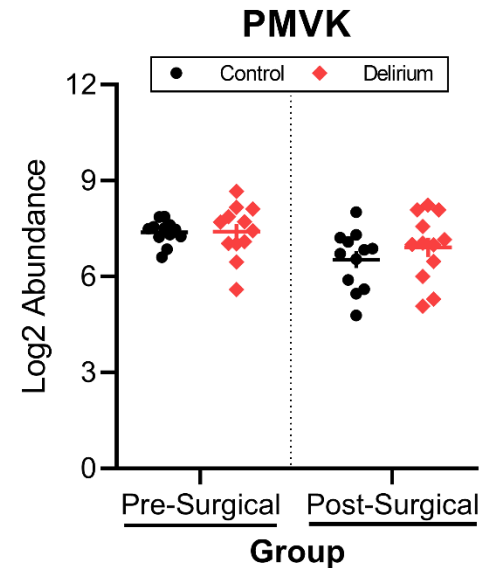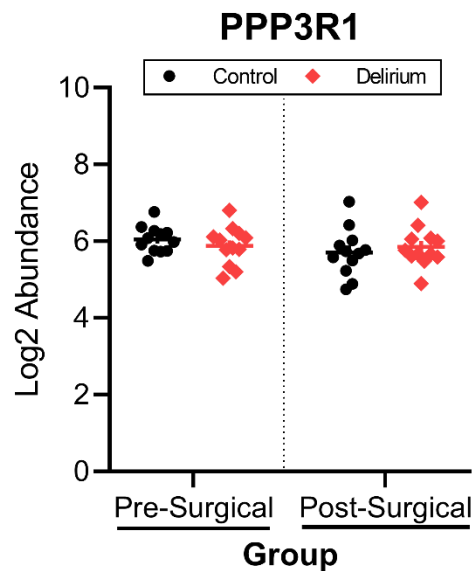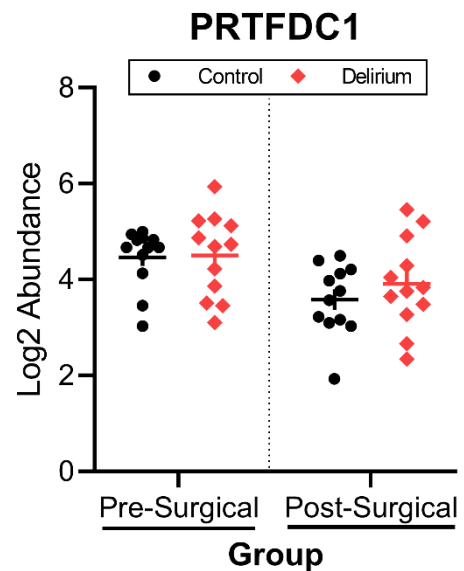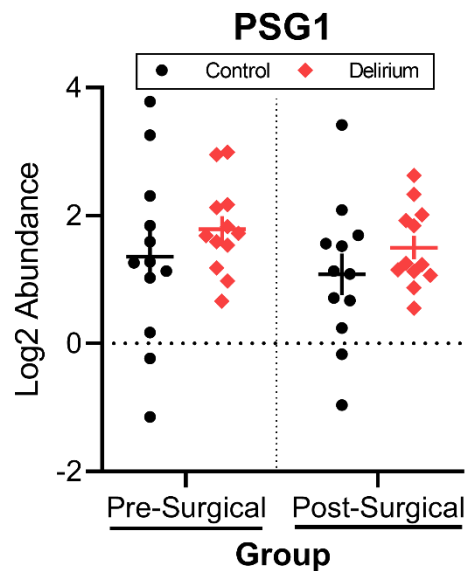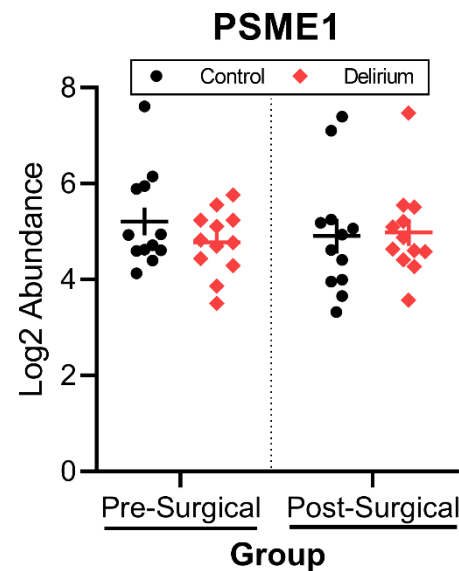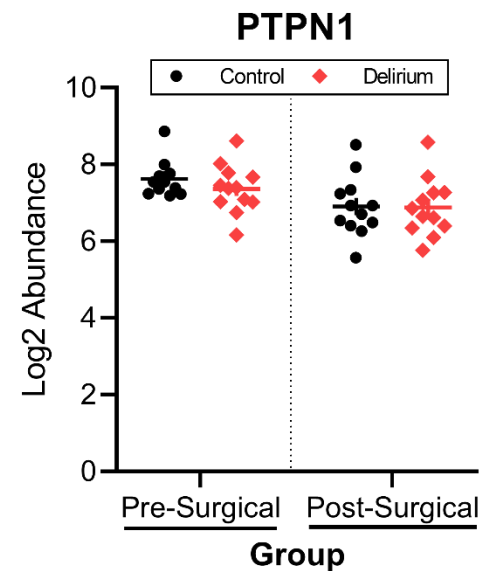



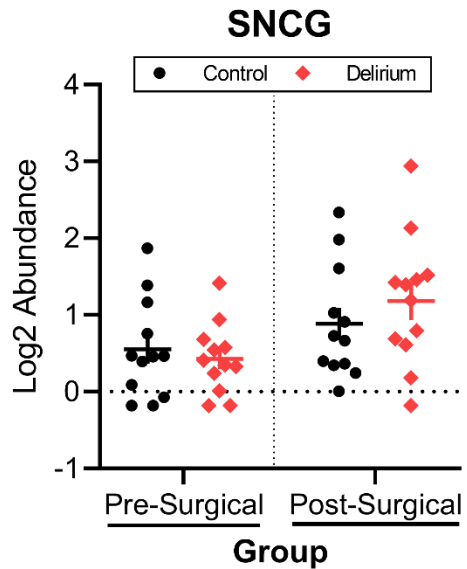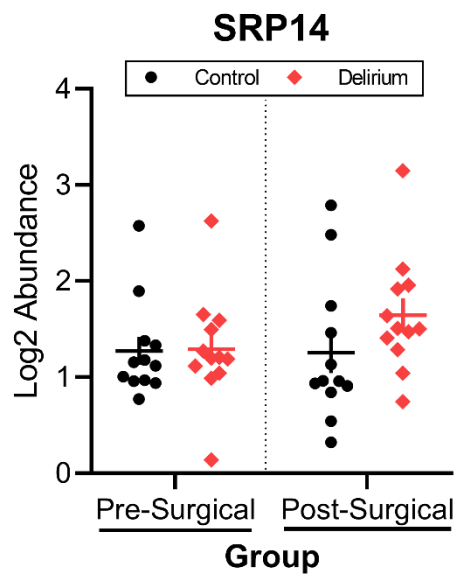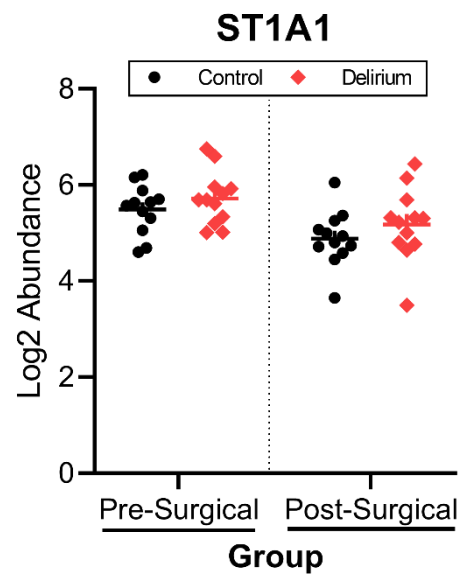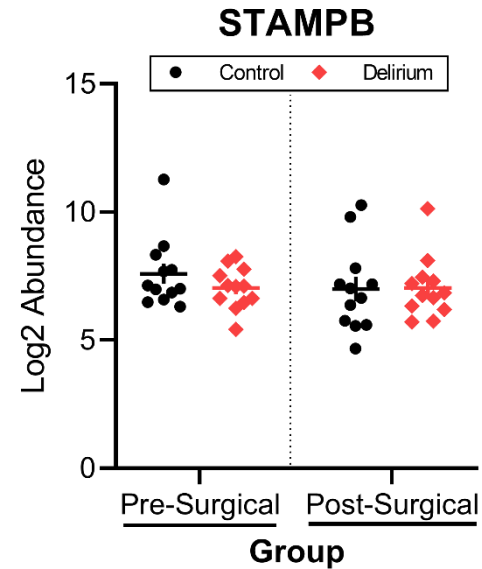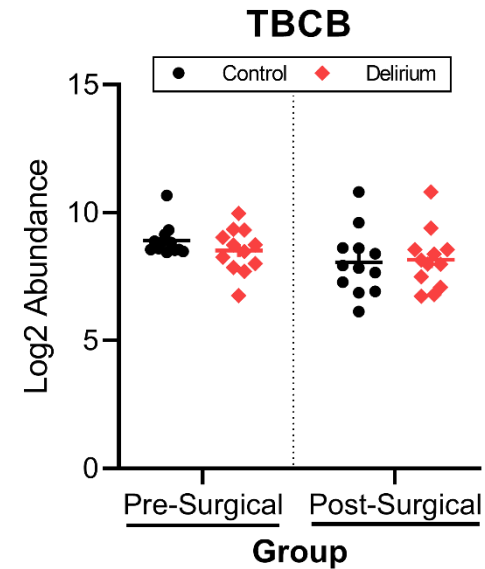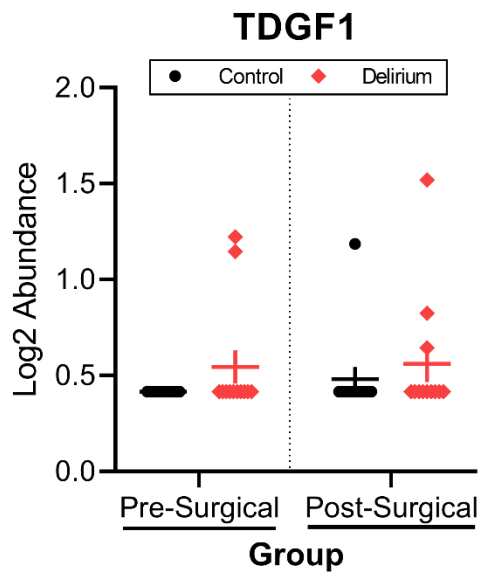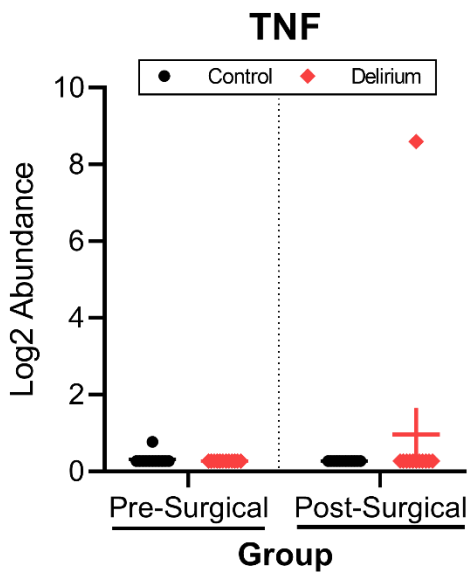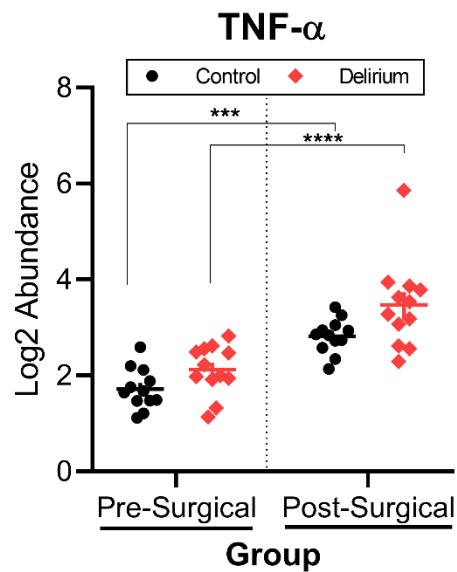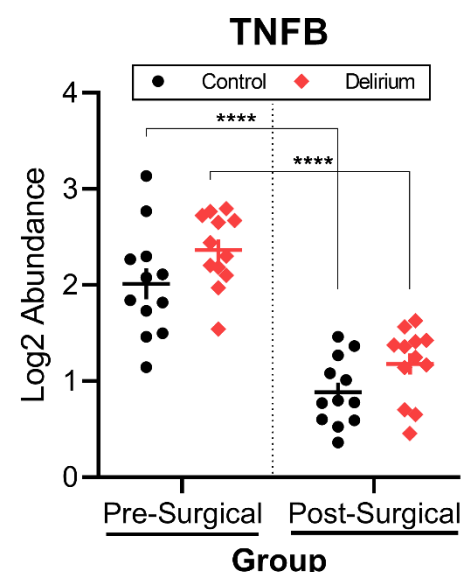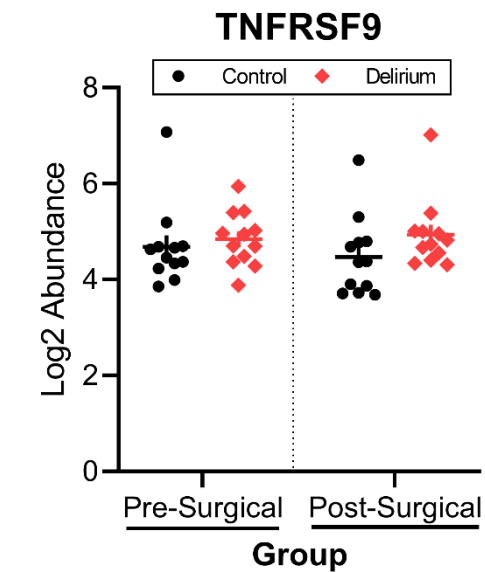

**TNFRSF13C**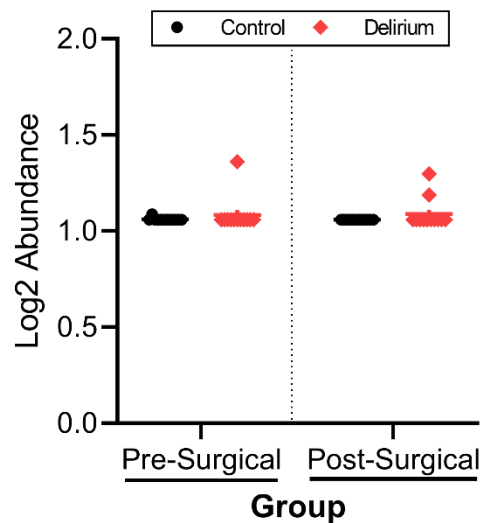**TNFSF14**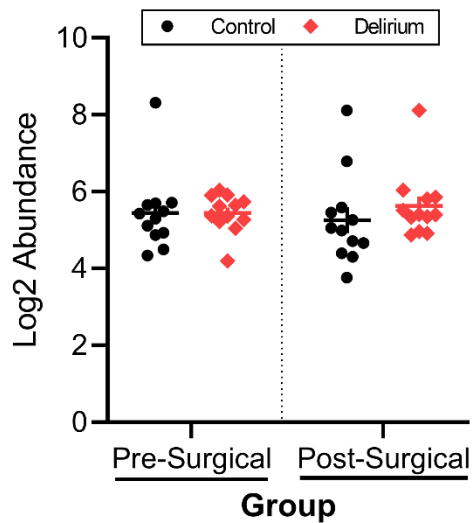**TPPP3**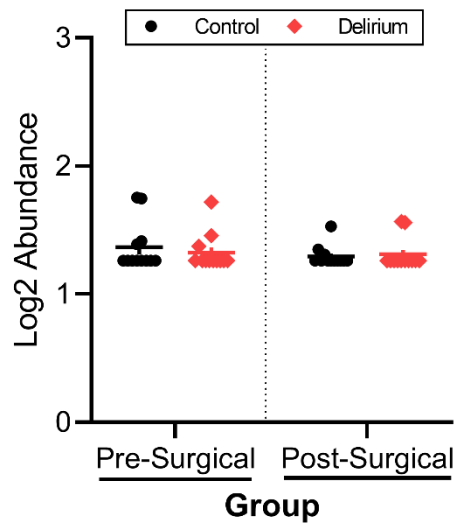**TRAIL**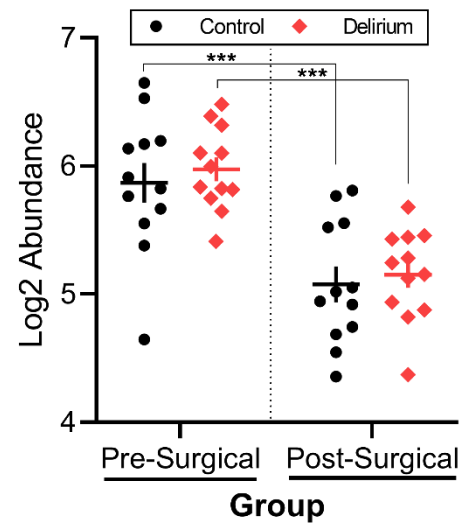**TRANCE**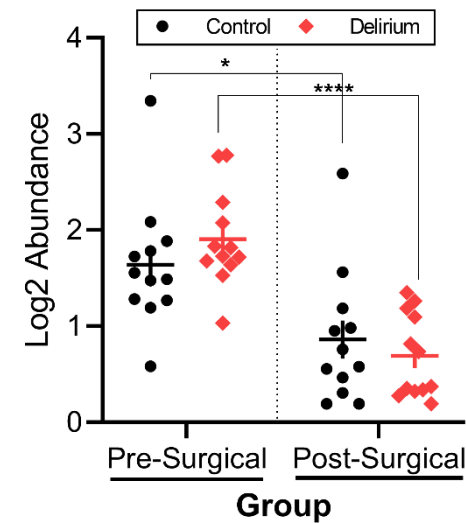**TSLP**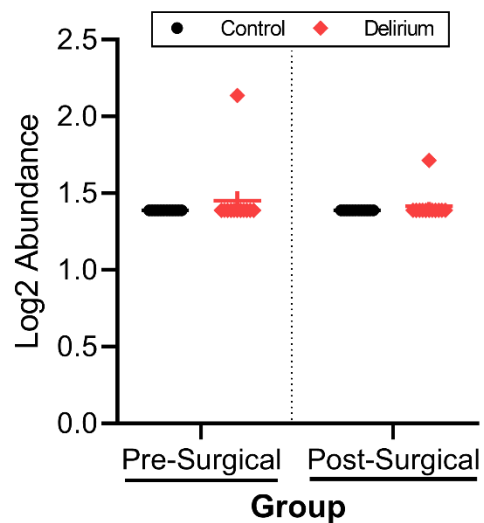**TWEAK**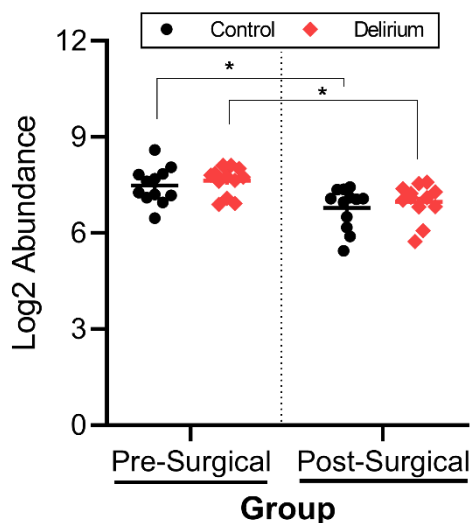**UBE2F**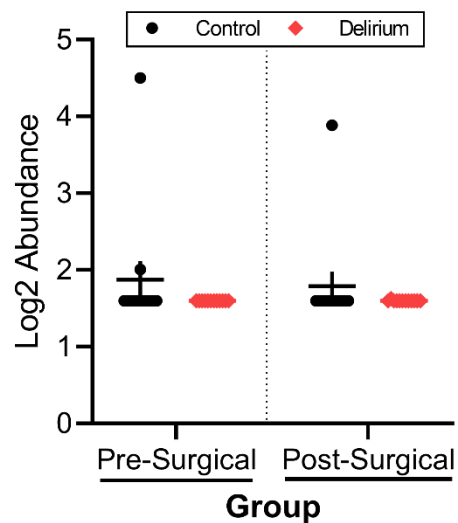**Urokinase**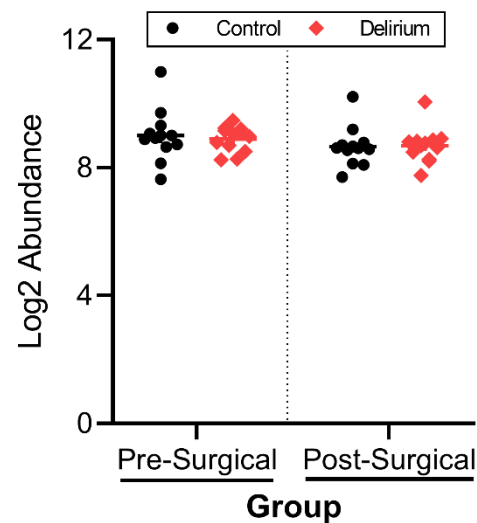**VEGF-A**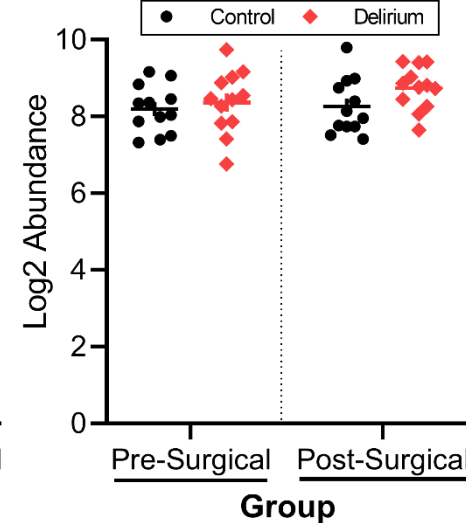

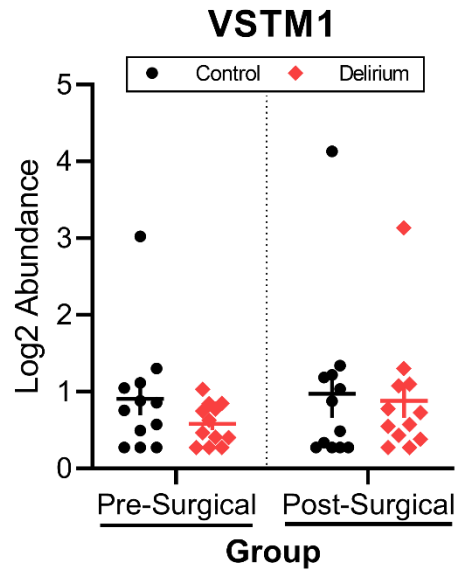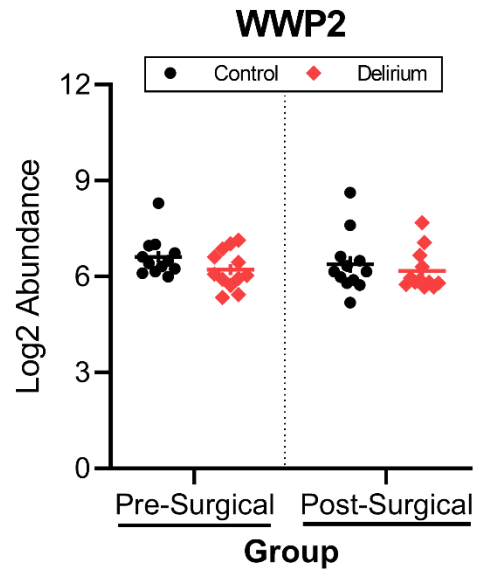



**Appendix B.** Individual graphs of proteins showing patient-specific changes from preoperative day 0 to postoperative day 1.

**Panels:**

Olink INFLAMMATION (v.3004) Panel

Olink NEURO EXPLORATORY (v.3901) Panel

**4E-BP1**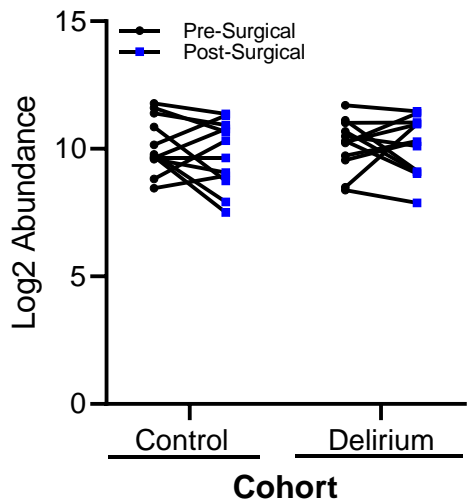**AARSD1**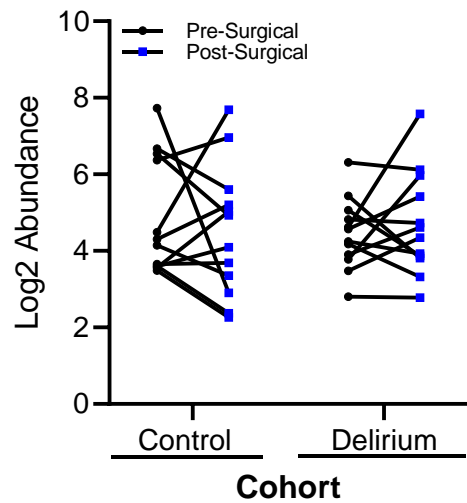**ABHD14B**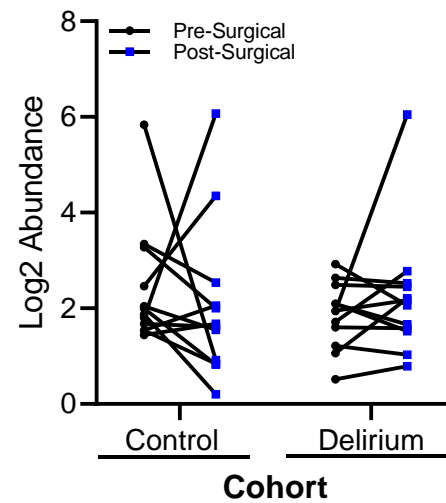**ADA**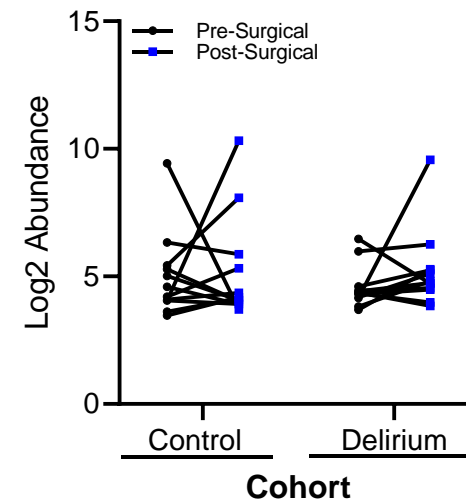**ADAM15**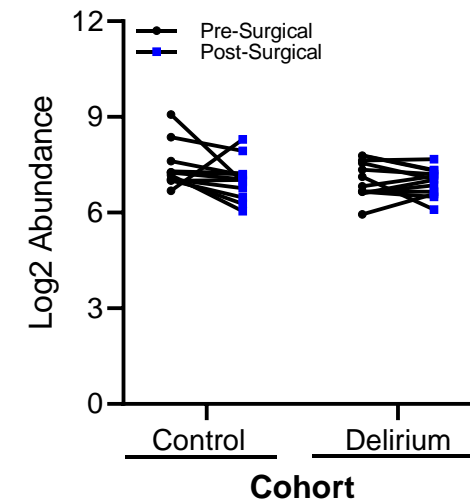**AKT1S1**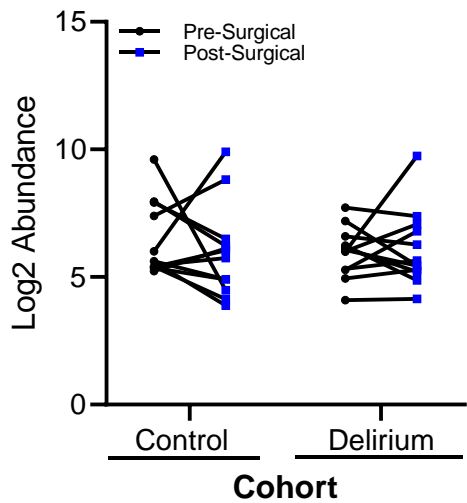**ANXA10**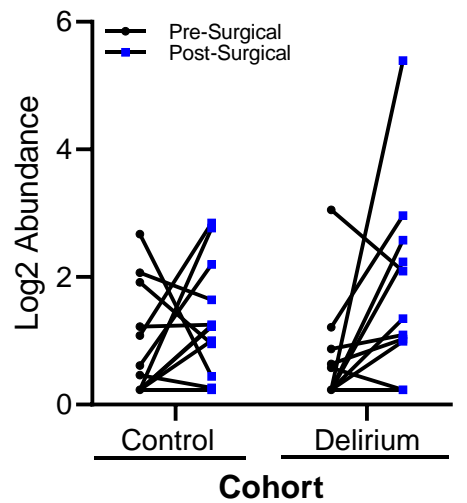**AOC1**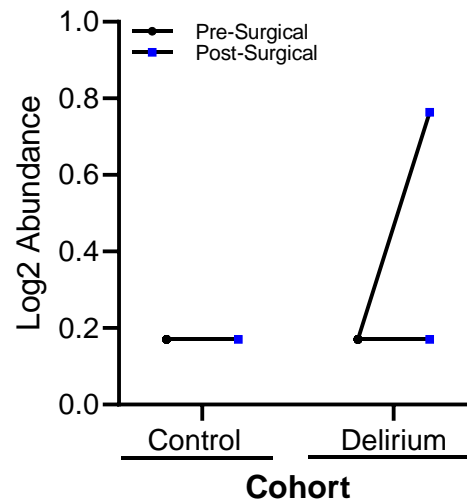**ARTN**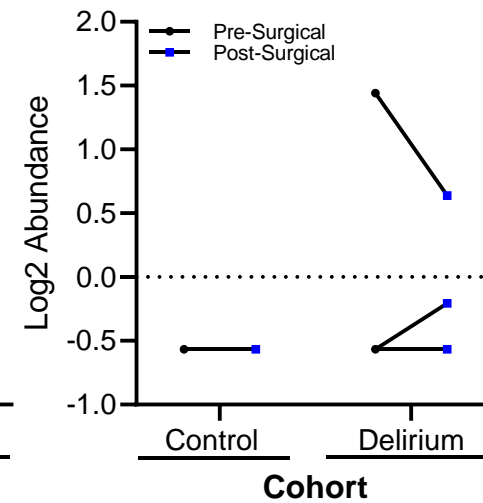**ASGR1**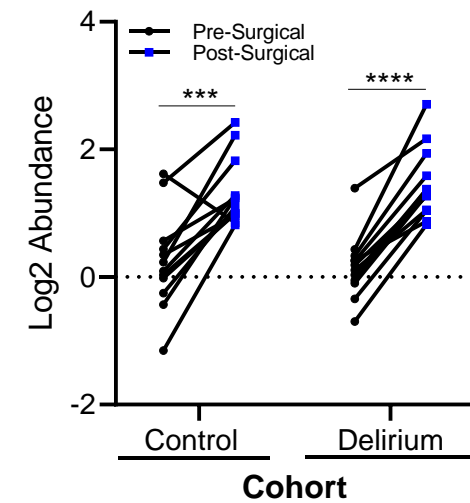

**ATP6V1F**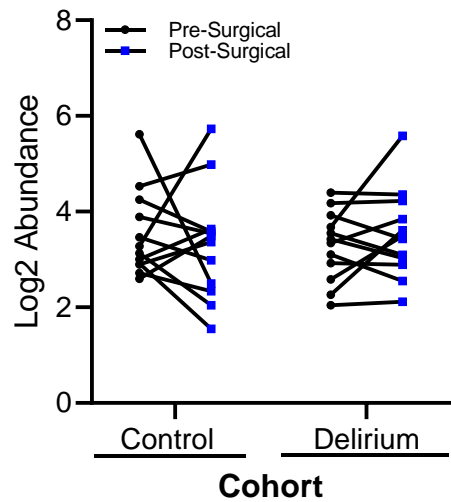**AXIN1**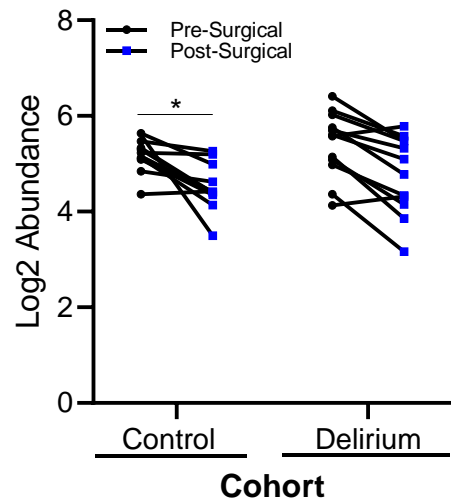**-NGF**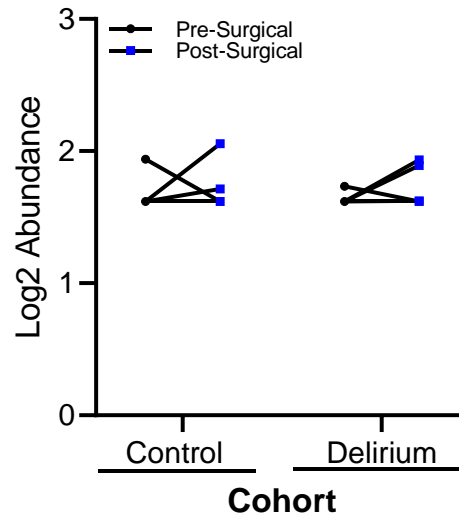**BST2**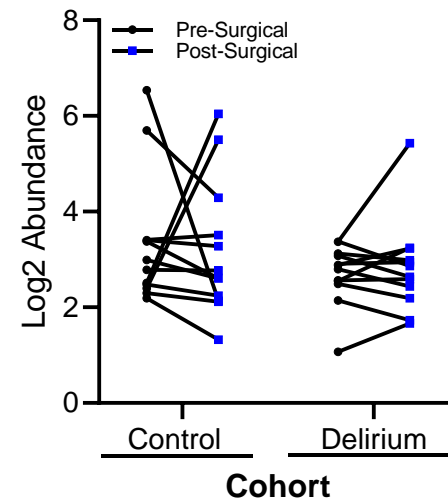**CARHSP1**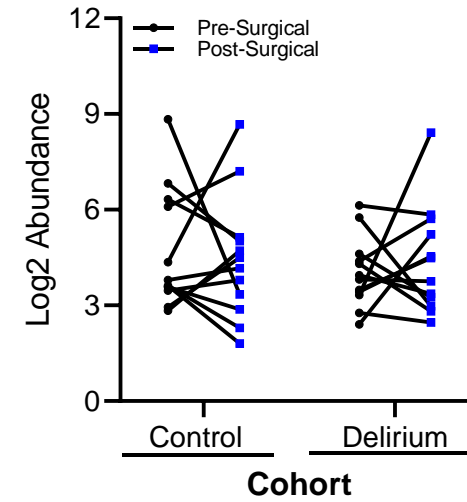**CASP-8**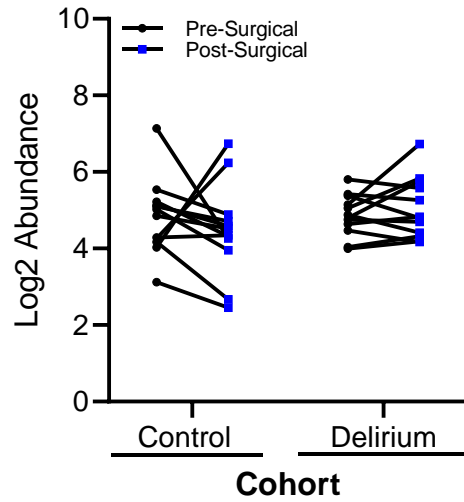**CCL3**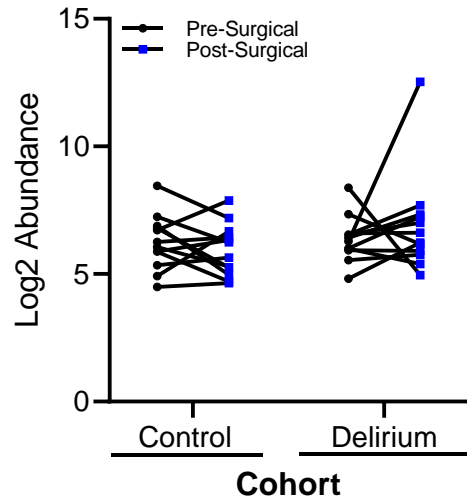**CCL4**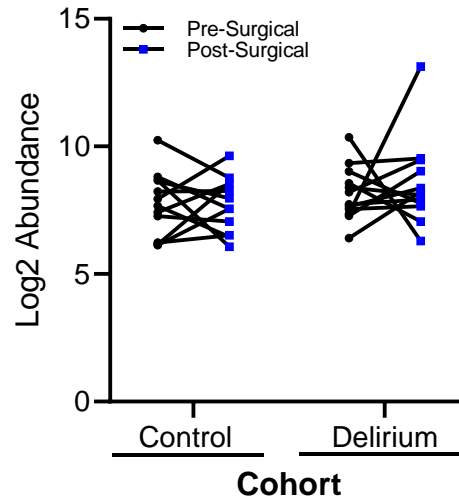**CCL11**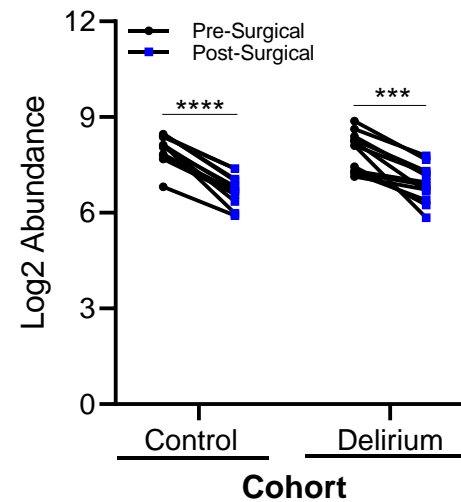**CCL19**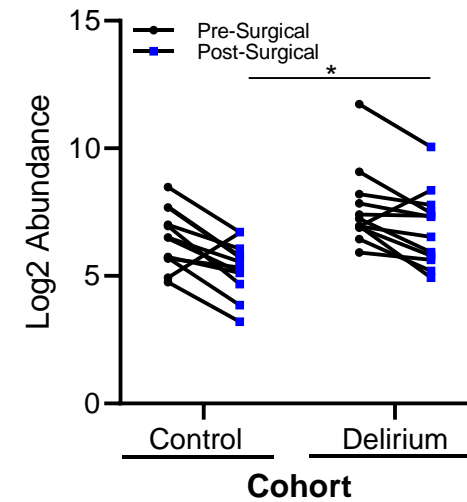

**CCL20**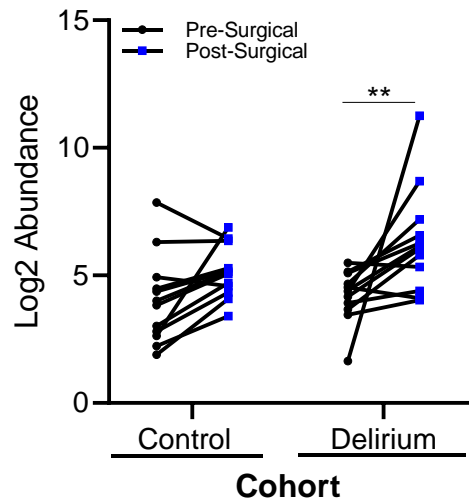**CCL23**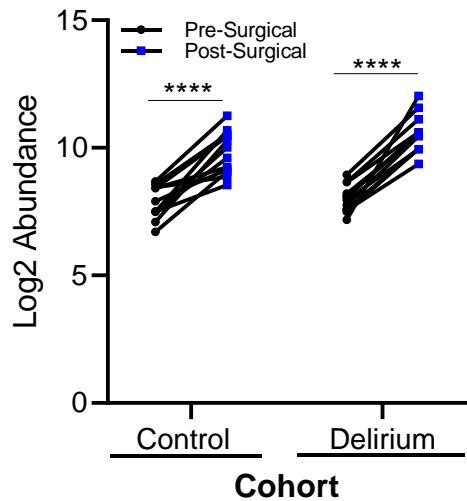**CCL25**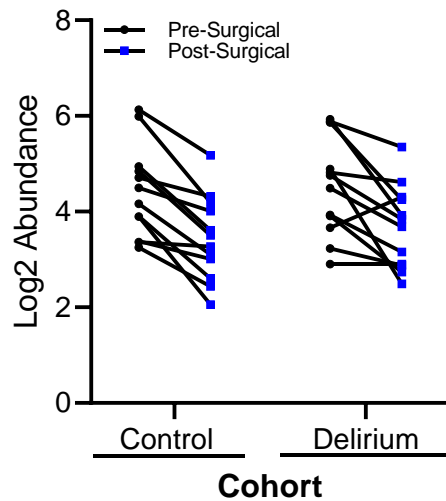**CCL27**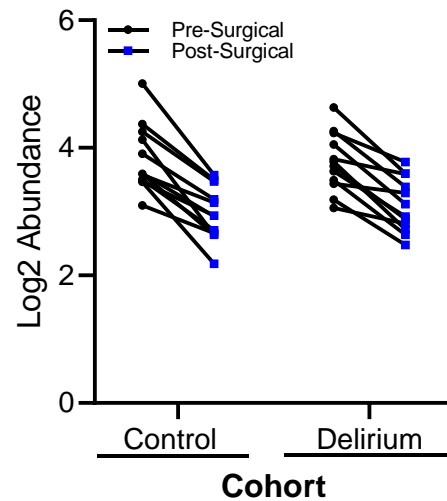**CCL28**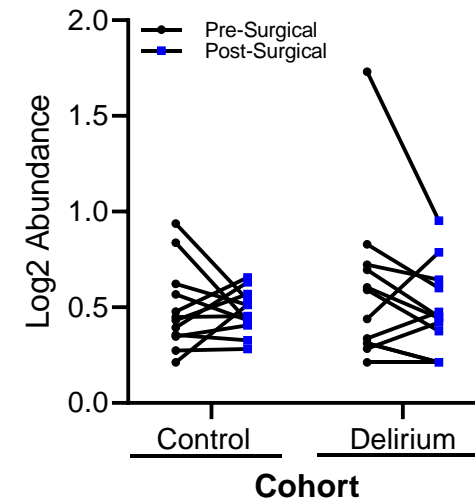**CD5**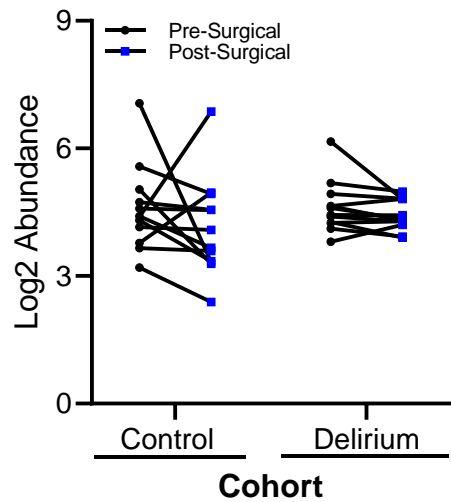**CD6**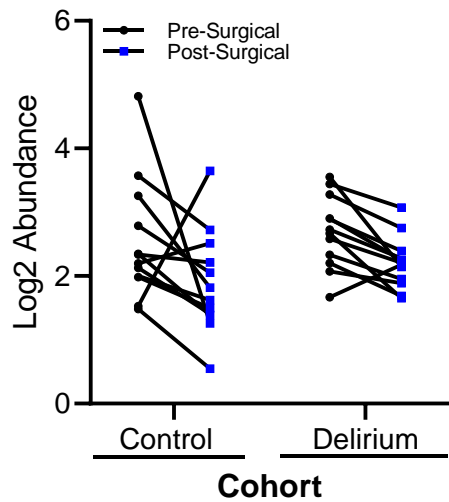**CD33**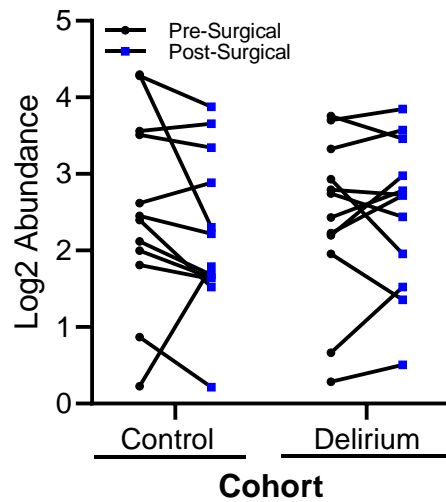**CD40**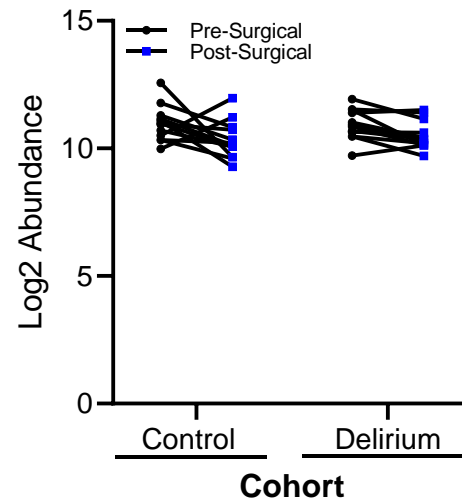**CD63**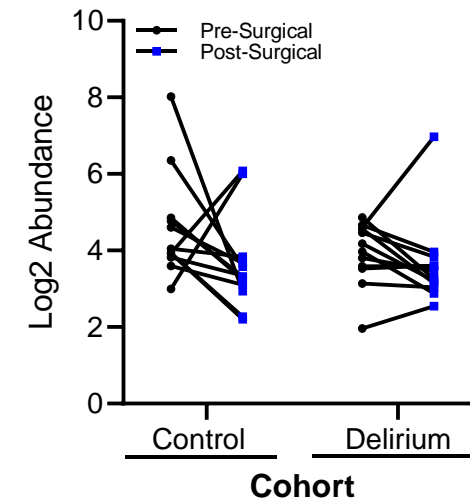

**CD244**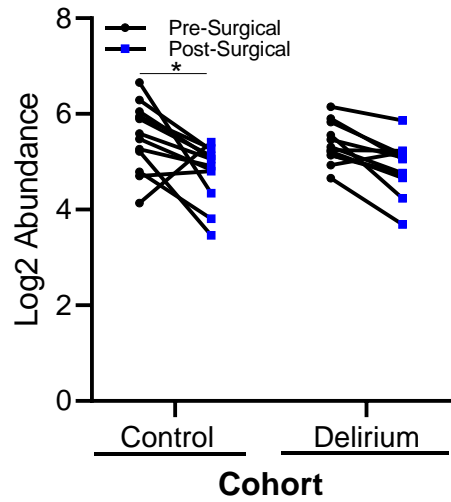**CD302**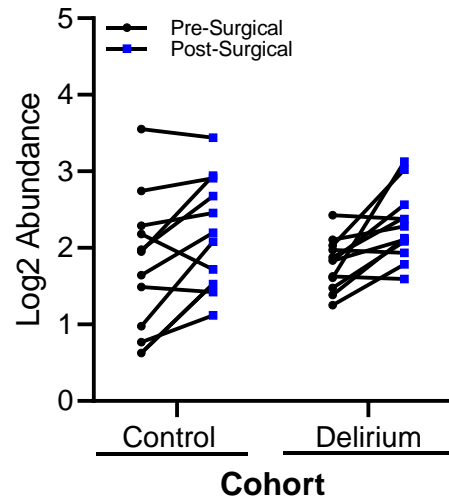**CDCP1**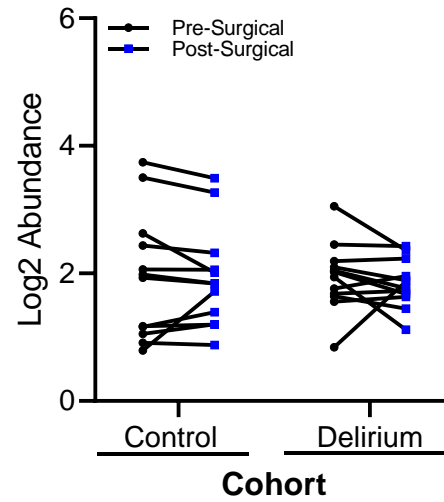**CDH15**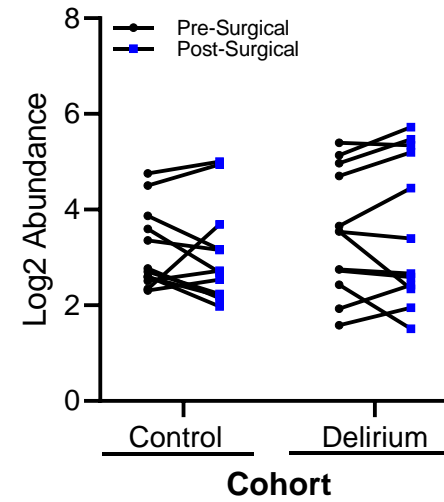**CDH17**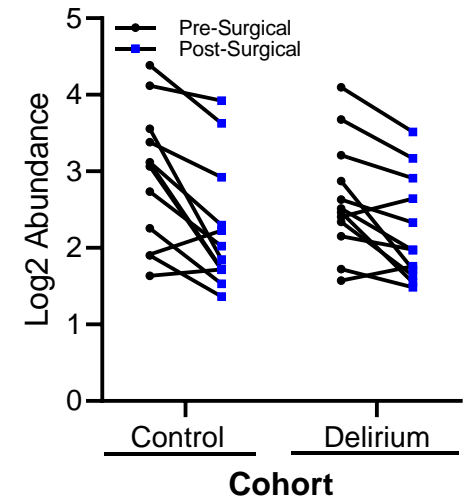**CEACAM3**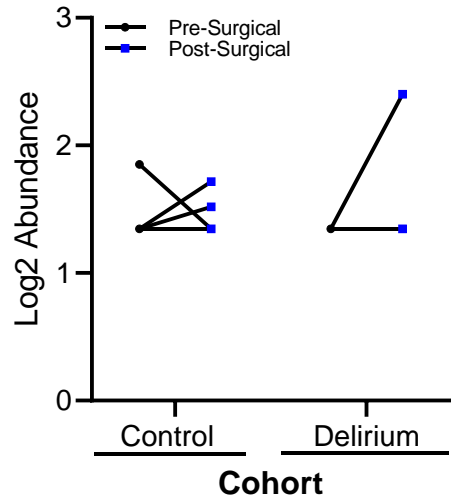**CETN2**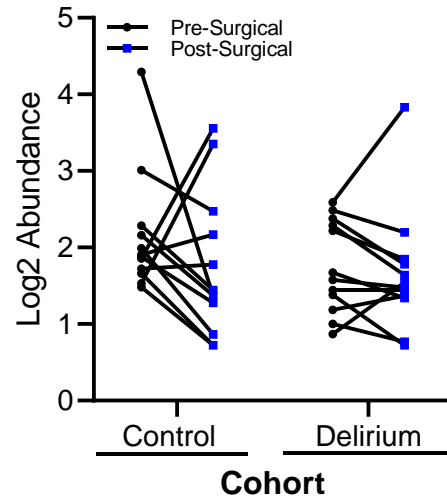**CLSTN1**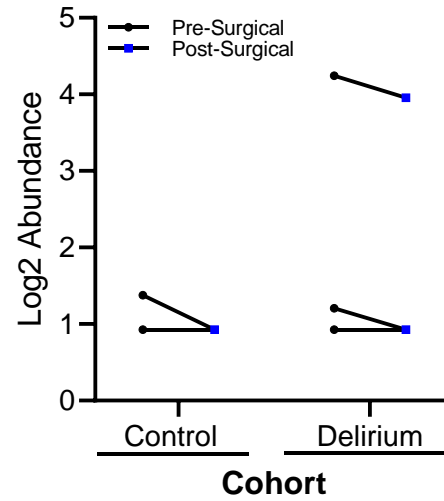**COL4A3BP**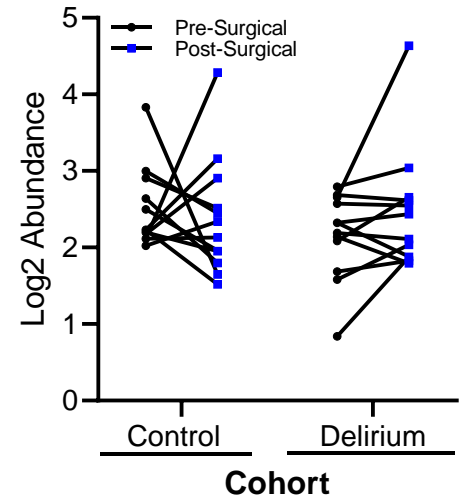**CRADD**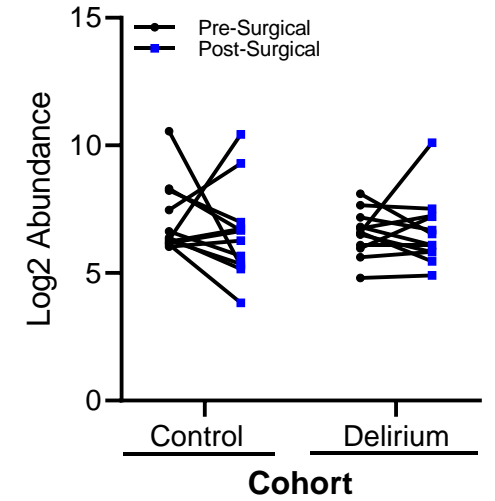

**CRIP2**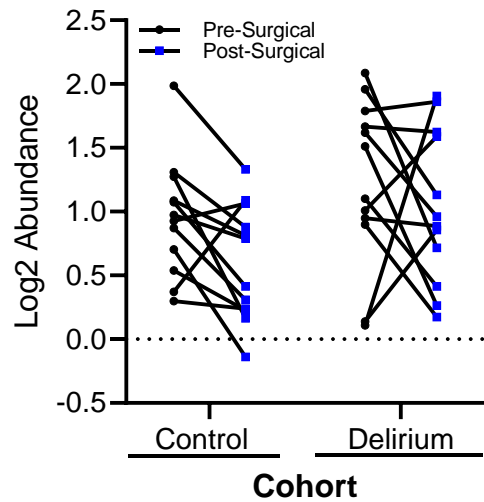**CSF-1**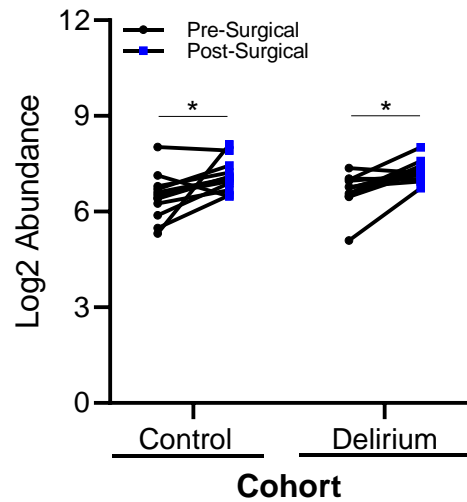**CST5**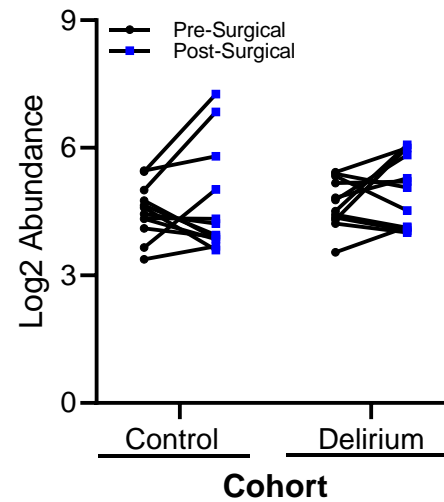**CTF1**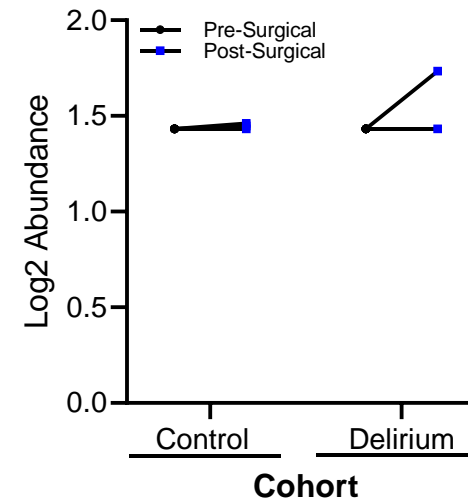**CX3CL1**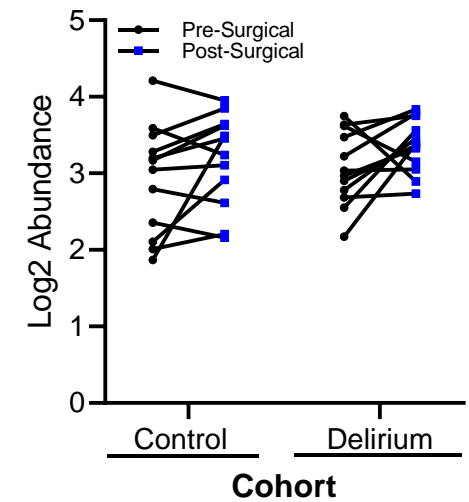**CXCL1**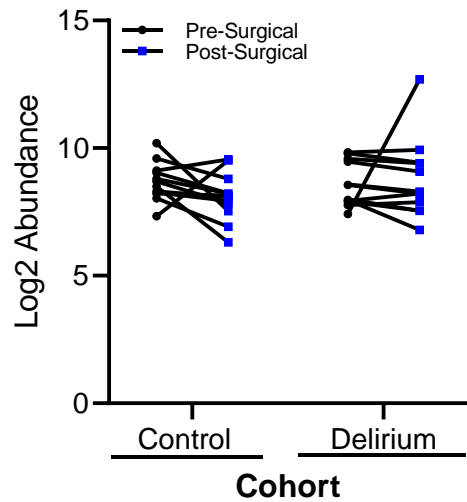**CXCL5**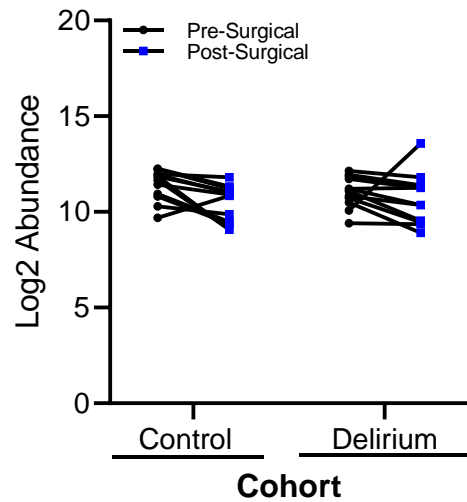**CXCL6**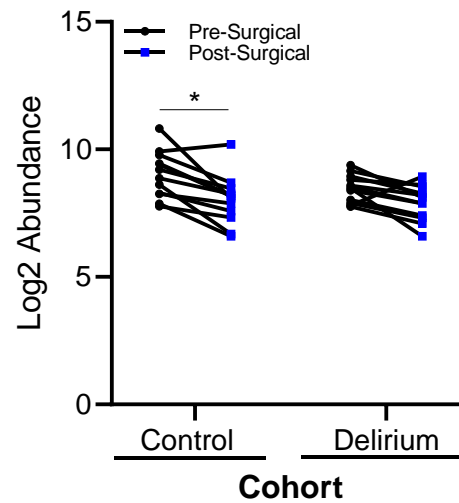**CXCL9**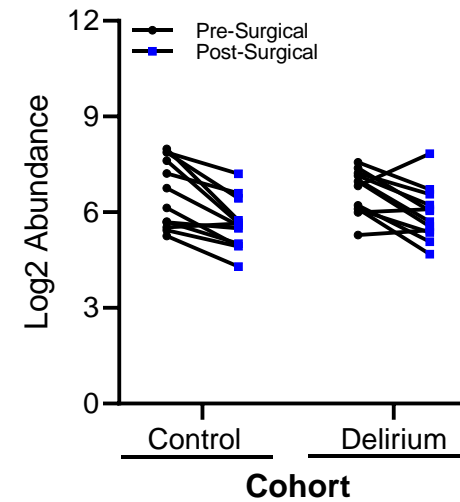**CXCL10**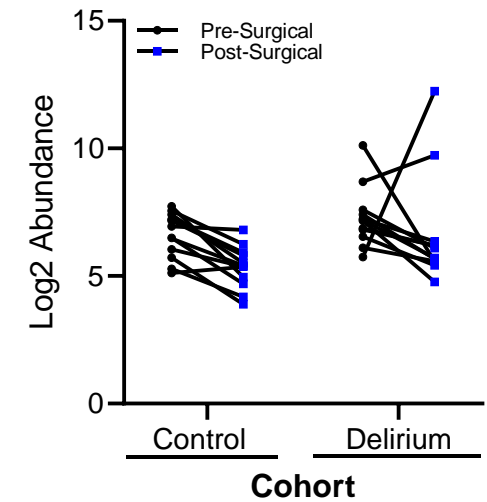

**CXCL11**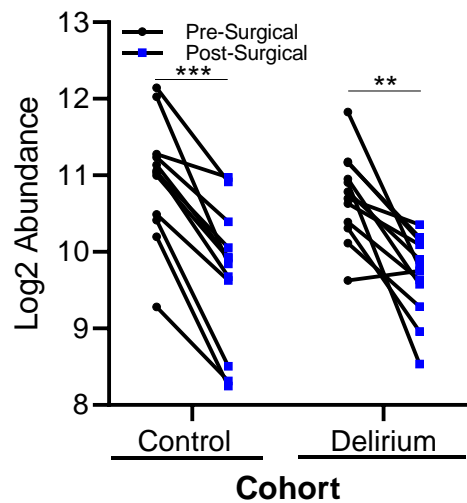**DEFB4A**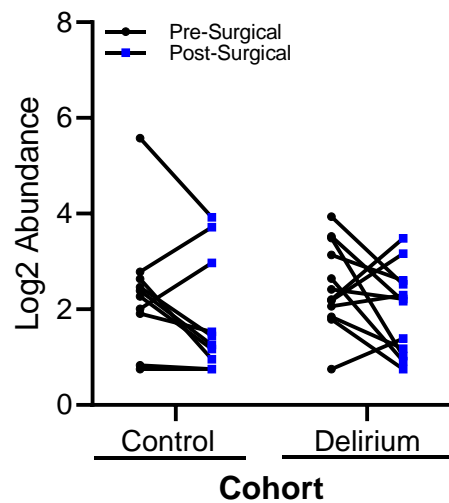**DNER**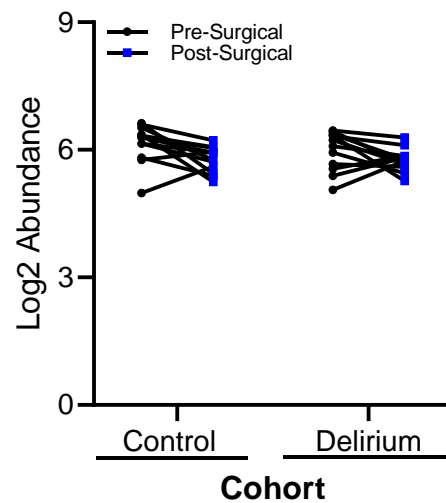**DPEP1**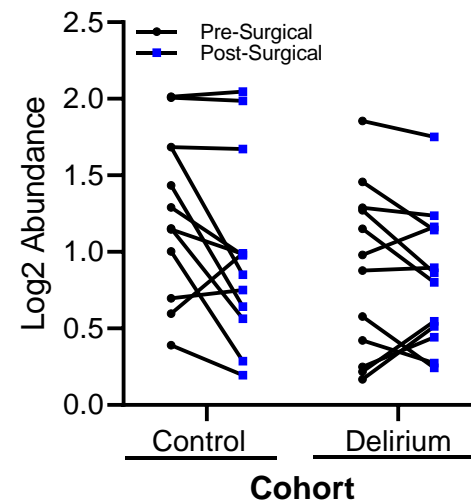**DPEP2**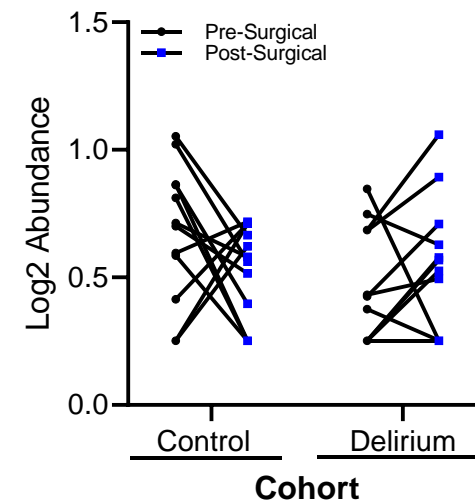**DSG3**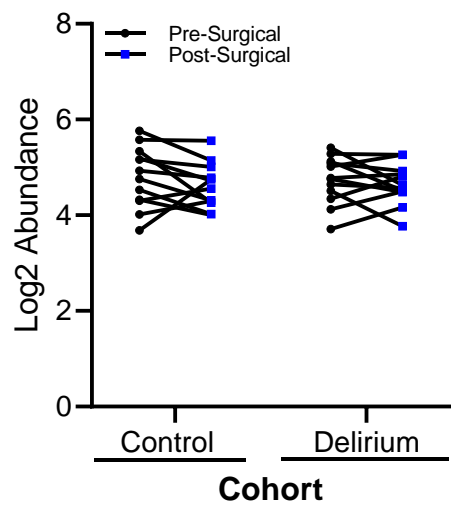**DUSP3**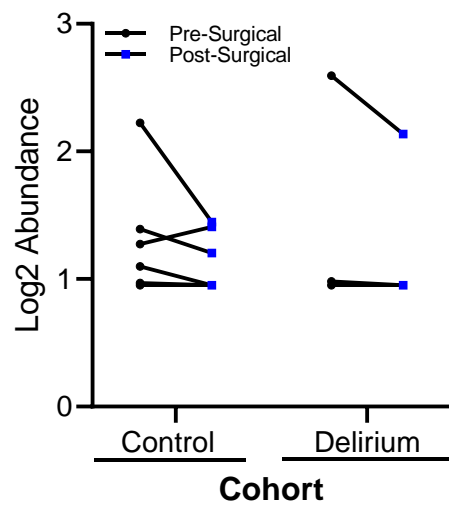**ECE1**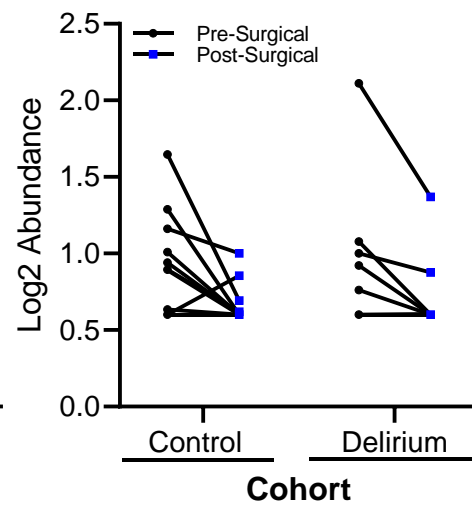**EIF4B**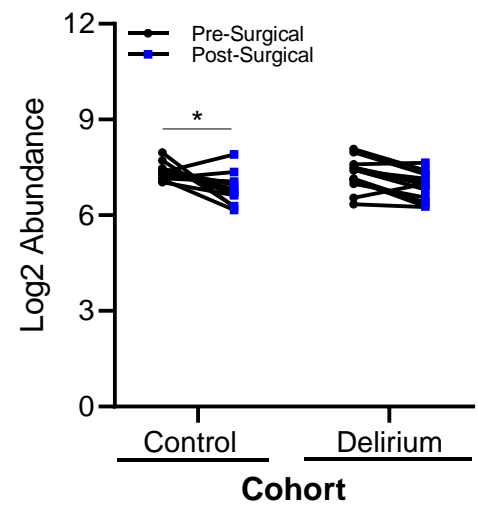**EN-RAGE**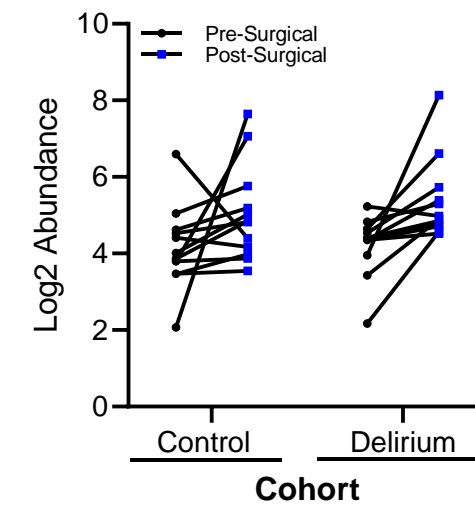

**EPHA10**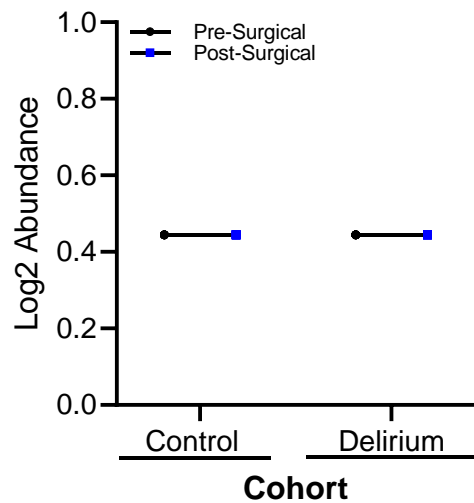**EREG**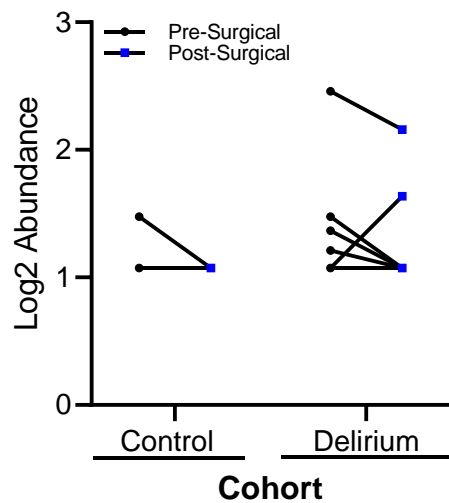**FCAR**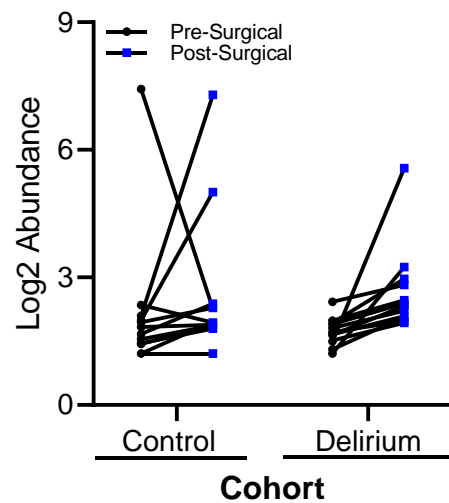**FGF-5**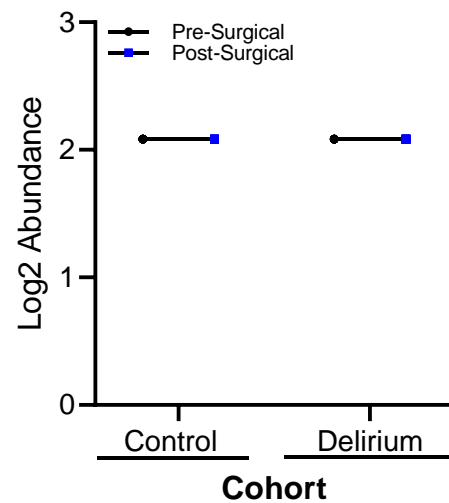**FGF-19**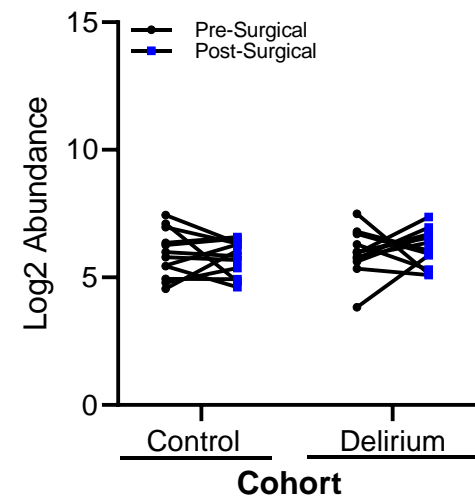**FGF-21**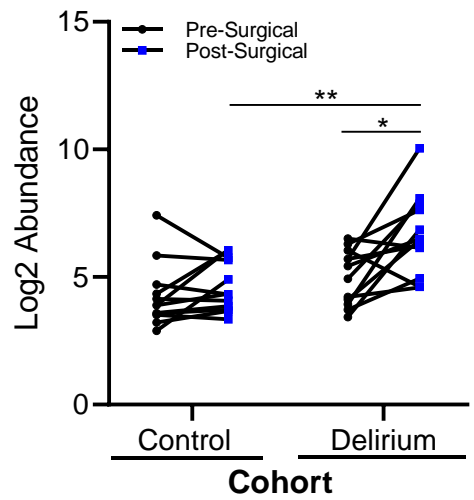**FGF-23**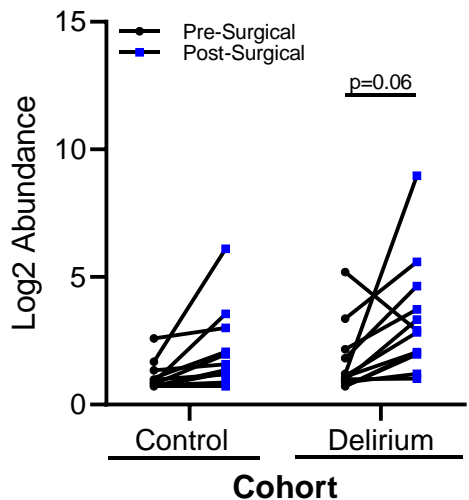**FGFR2**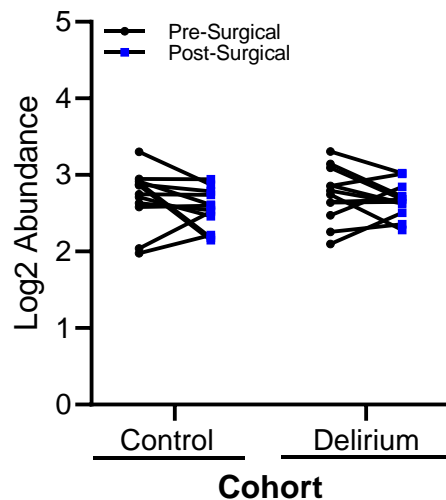**FHIT**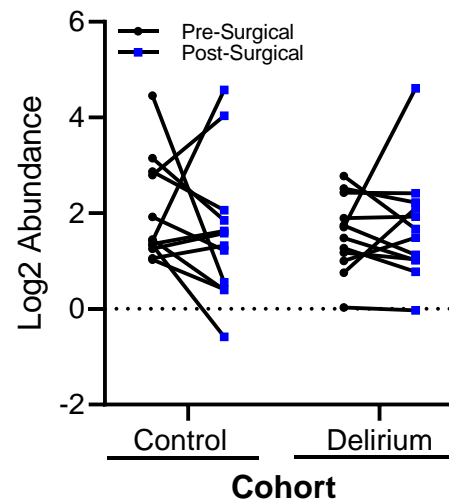**FKBP5**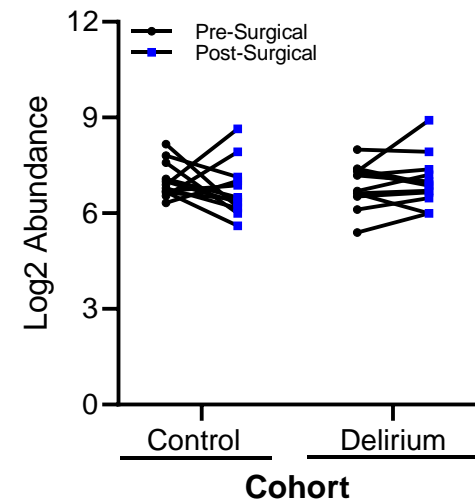



**FKBP7**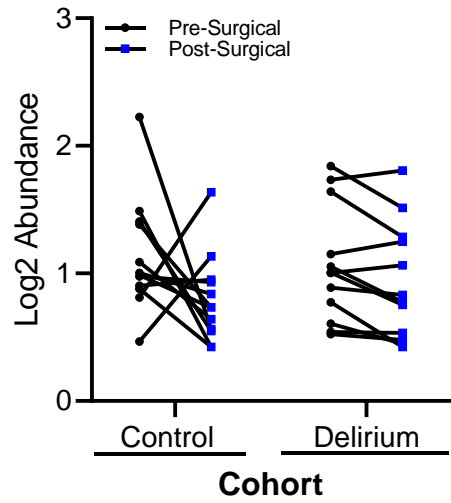**Fit3L**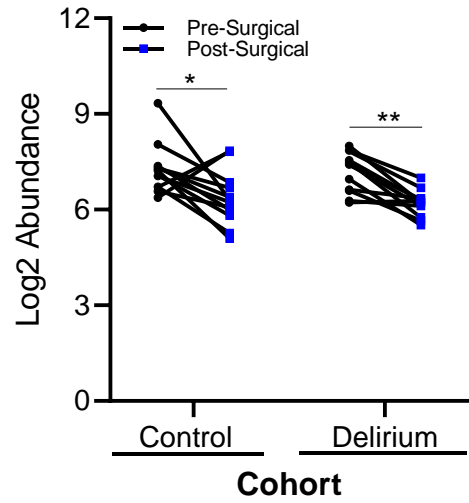**FOLR2**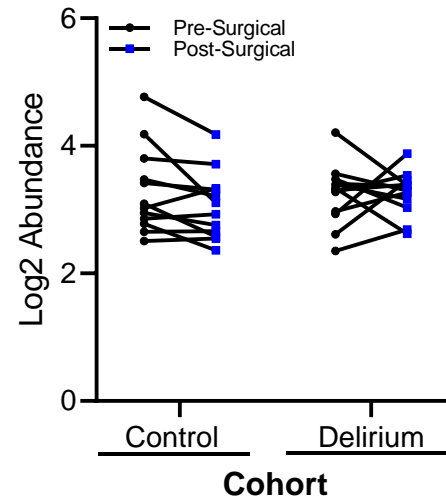**FUT8**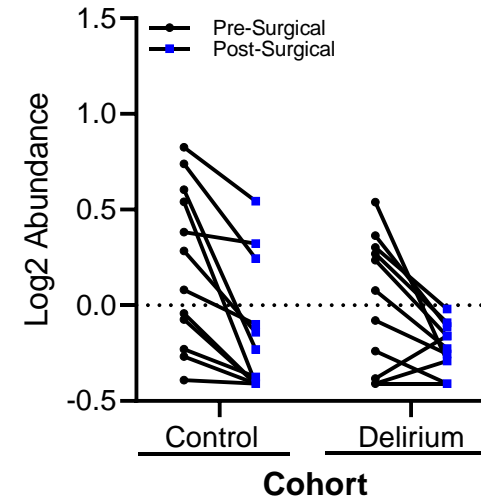**GBP2**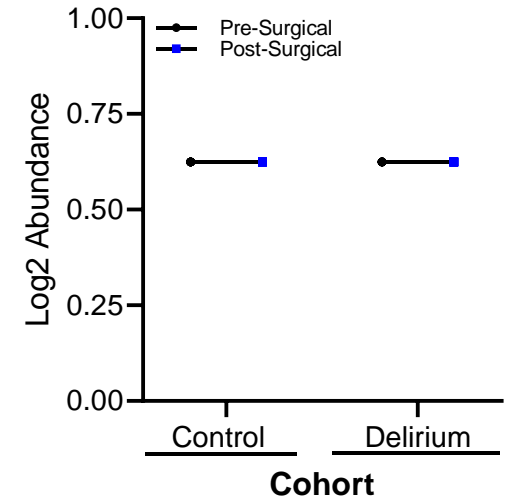**GDNF**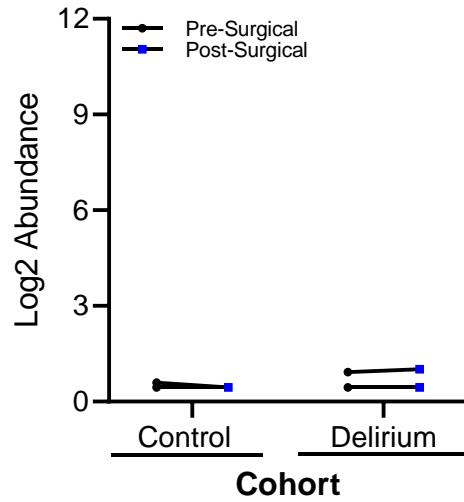**GGT5**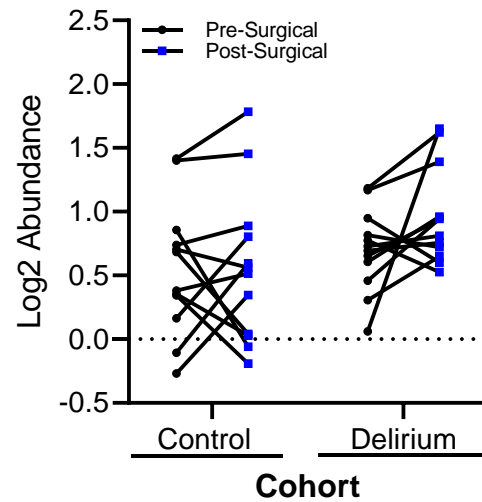**GPNMB**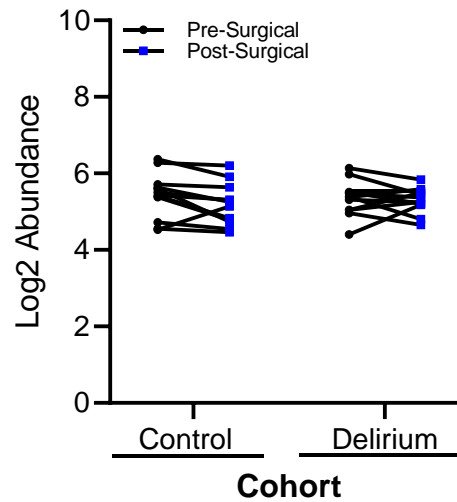**GSTP1**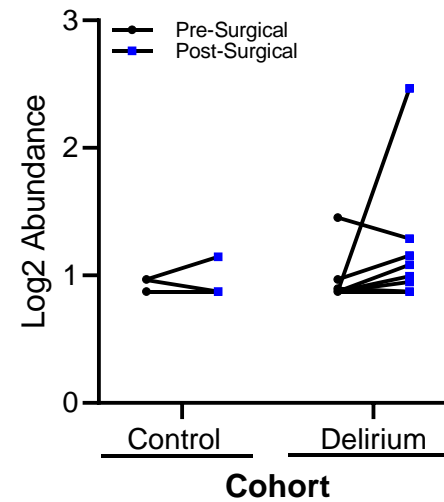**HGF**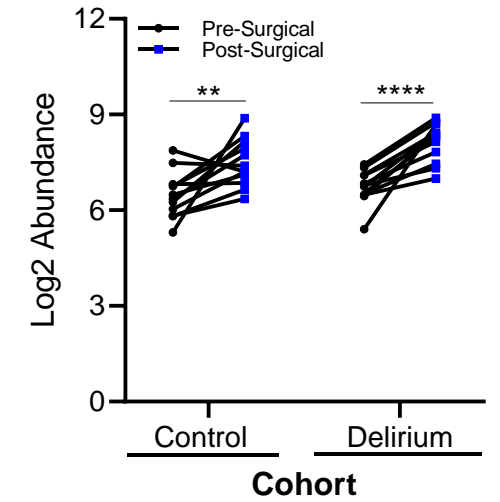

**HMOX2**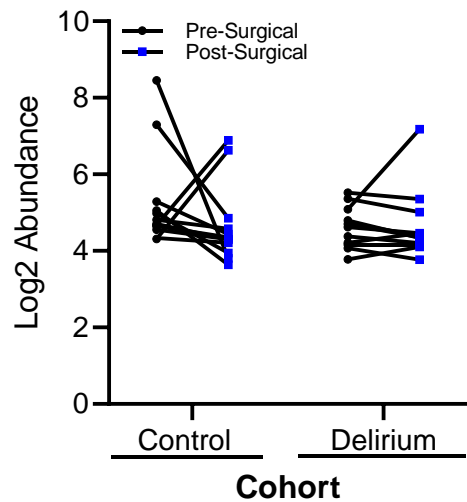**HSP90B1**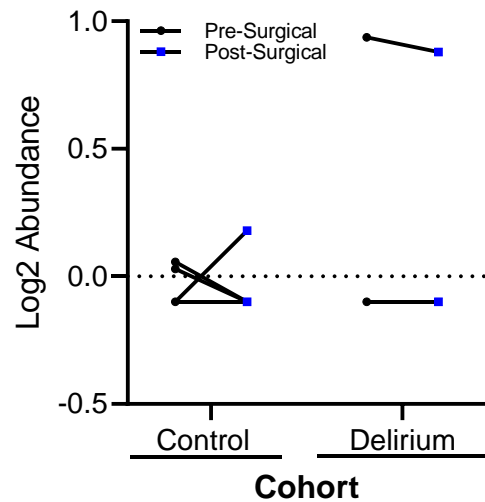**IFI30**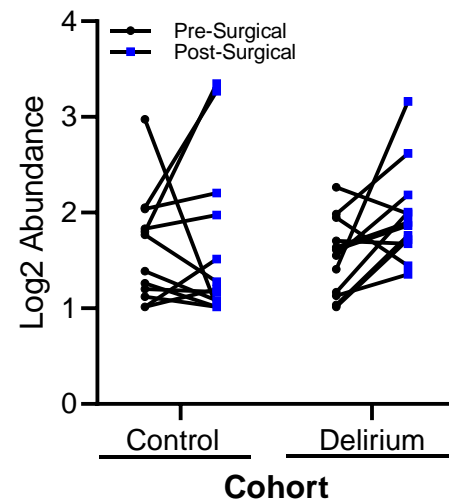**IFN- $\gamma$** 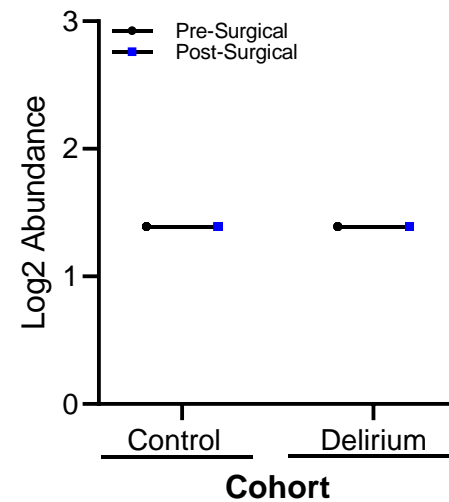**IFNL1**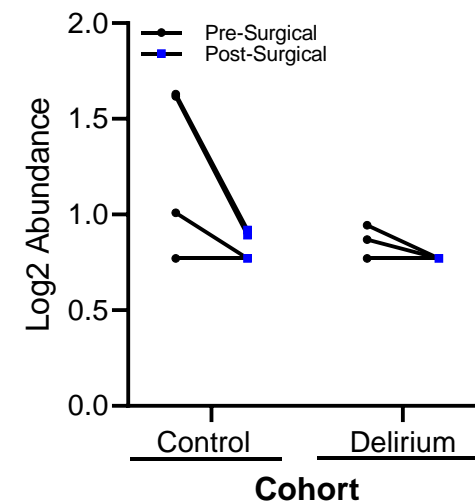**IKZF2**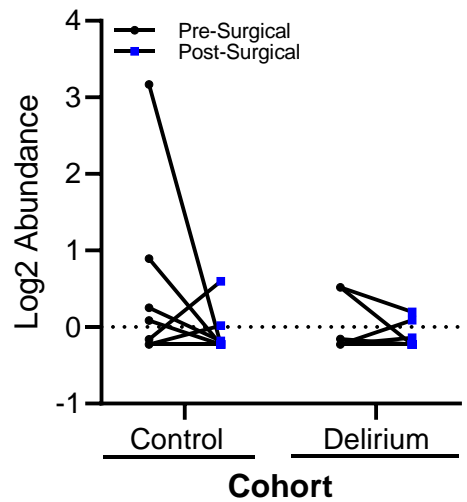**IL-1 $\alpha$** 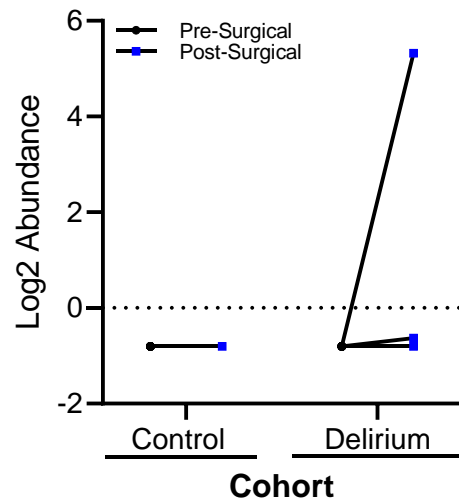**IL-2**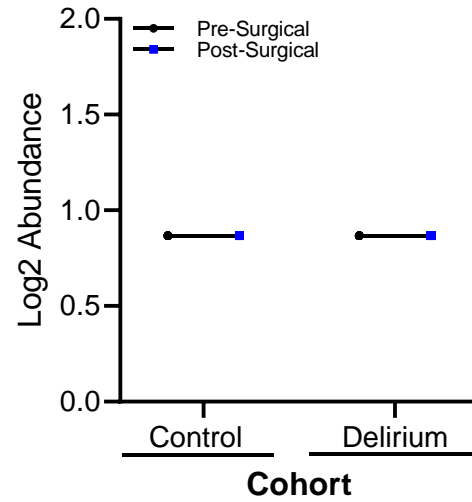**IL-2RB**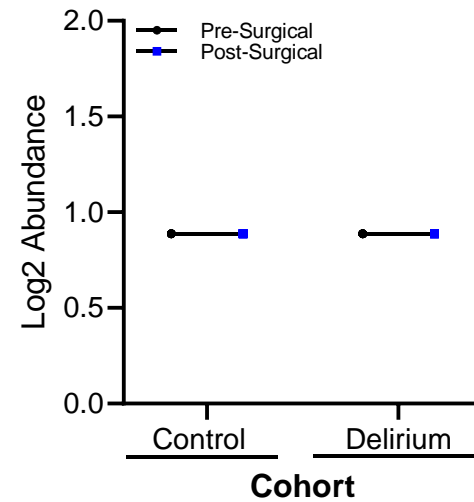**IL-4**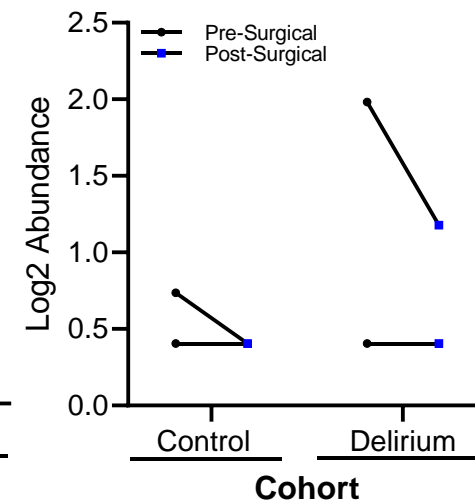

**IL-5**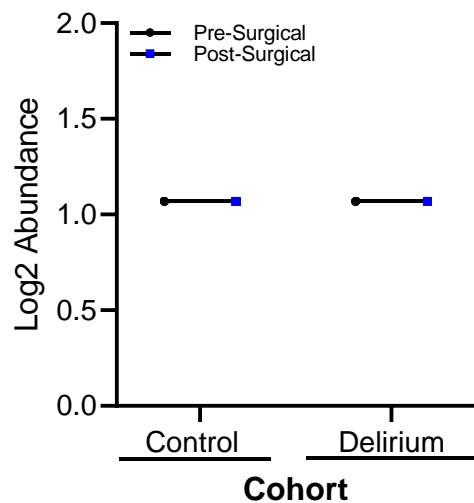**IL-6**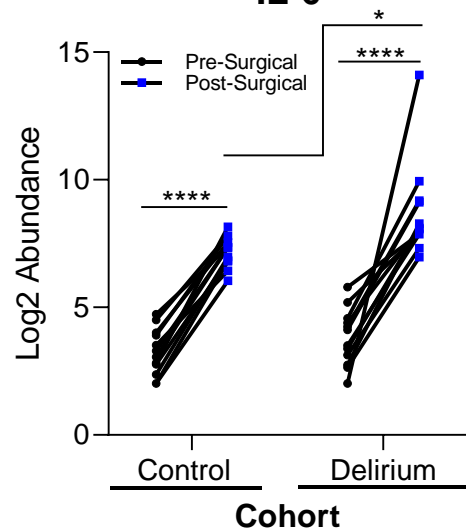**IL-7**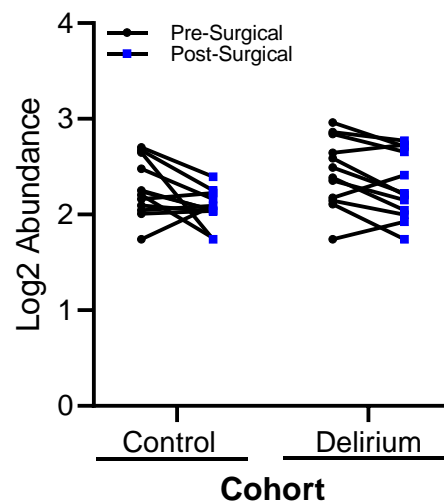**IL-8**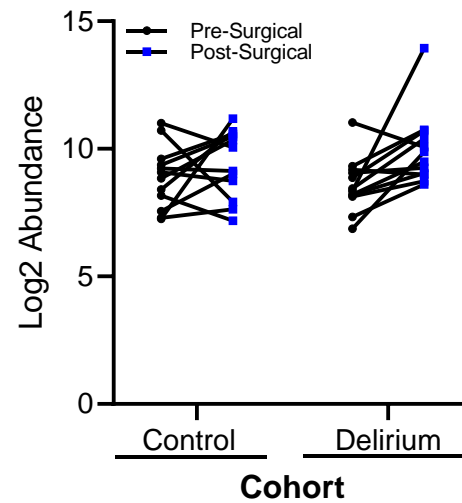**IL-10**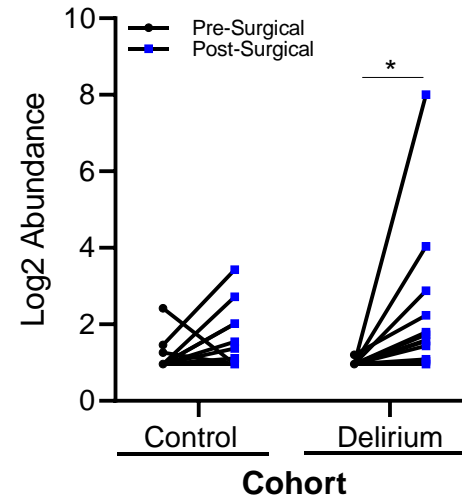**IL-10RA**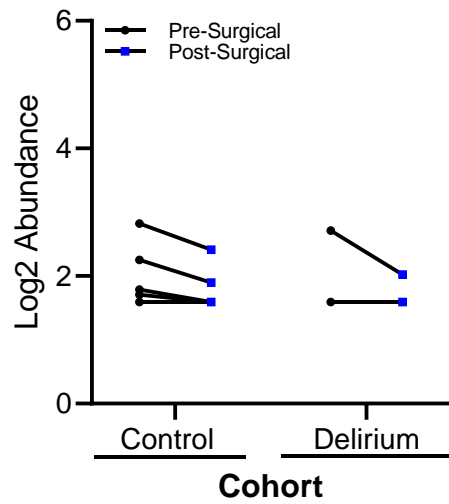**IL-10RB**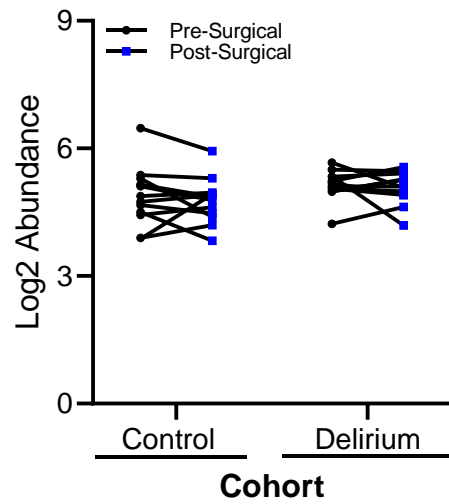**IL-12B**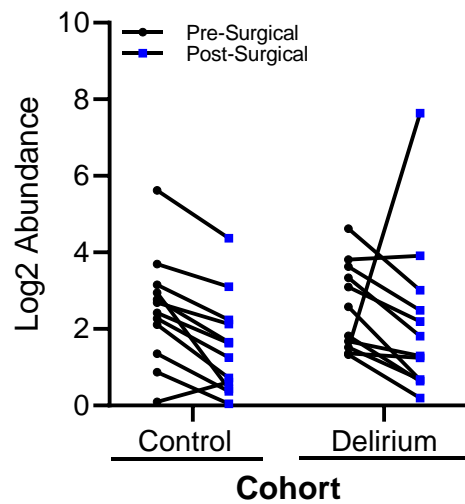**IL-13**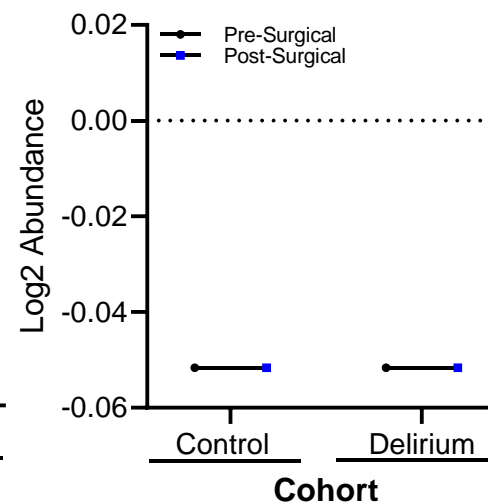**IL-15**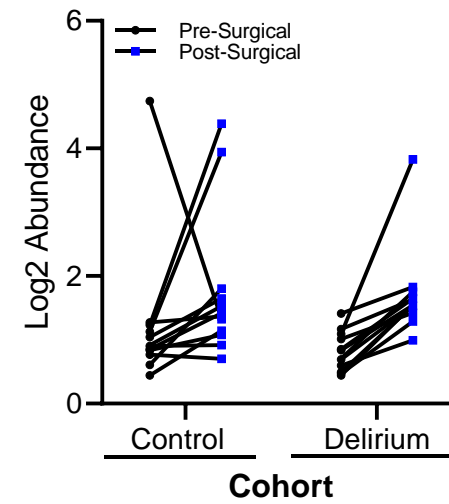

**IL-15RA**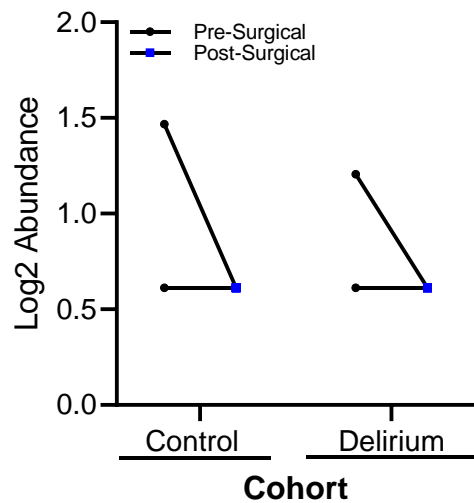**IL-17A**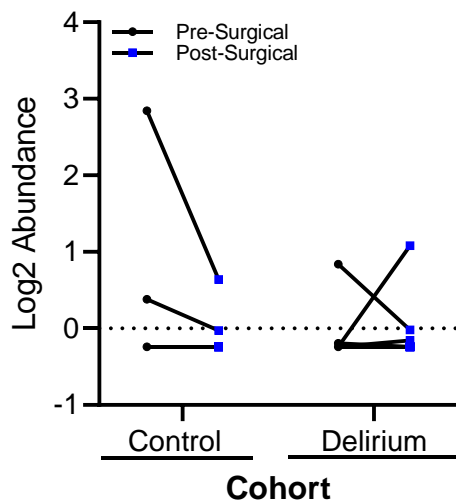**IL-17C**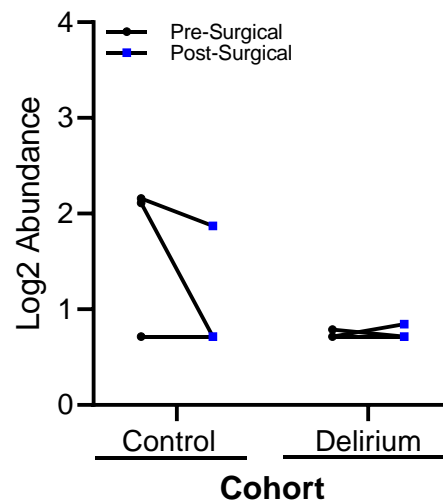**IL-18**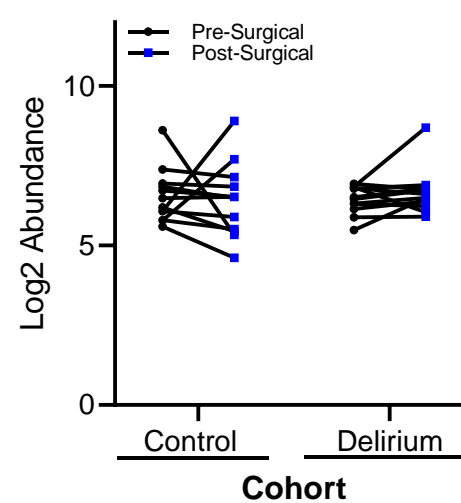**IL-18R1**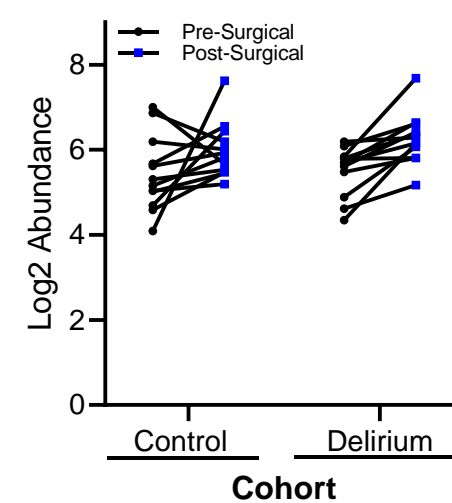**IL-20**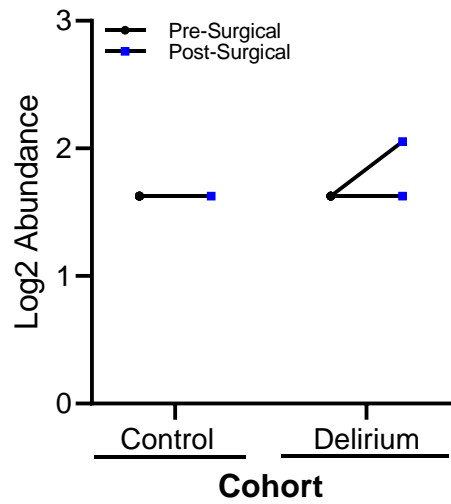**IL-20RA**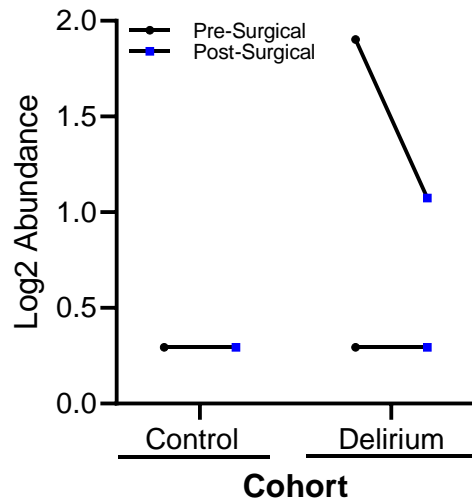**IL-22RA1**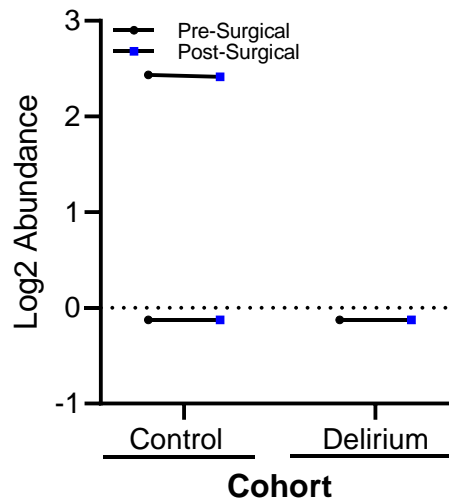**IL-24**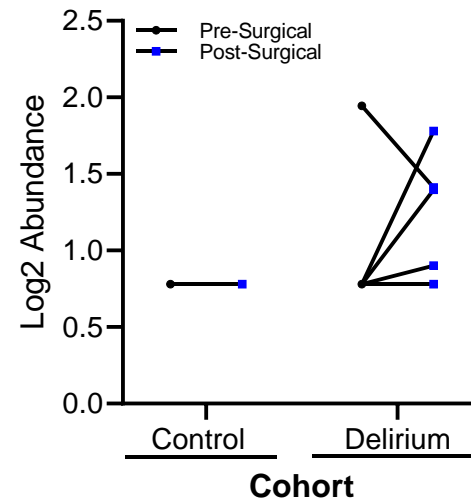**IL-32**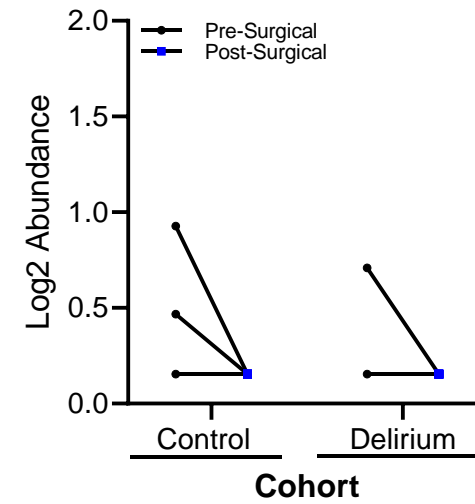

**IL-33**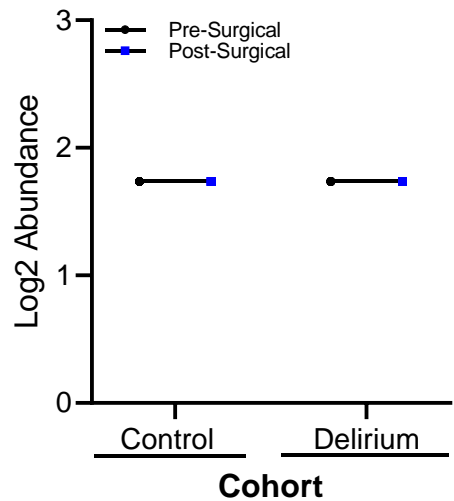**ILKAP**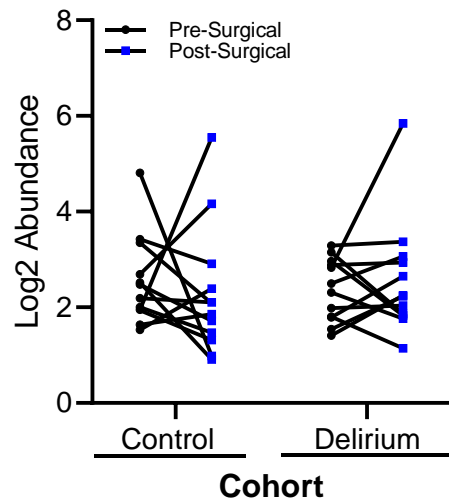**IMPA1**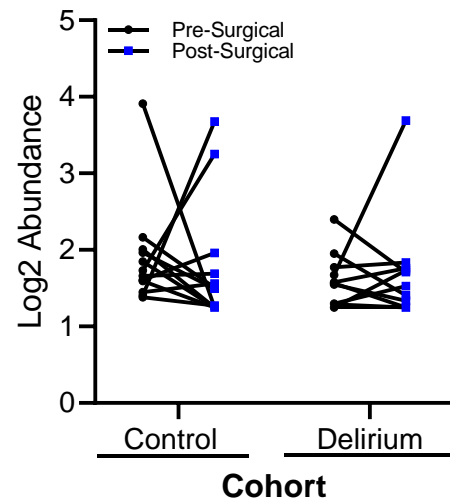**ING1**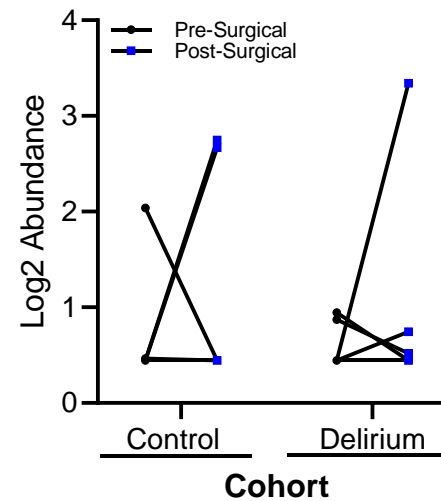**ISLR2**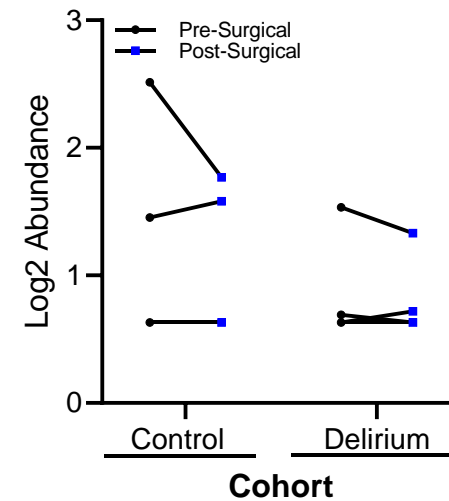**KIF1BP**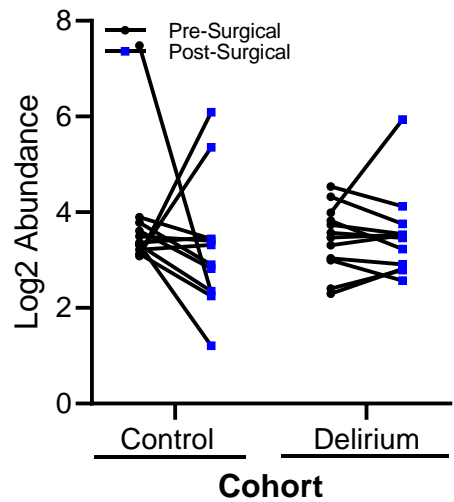**KIR2DL3**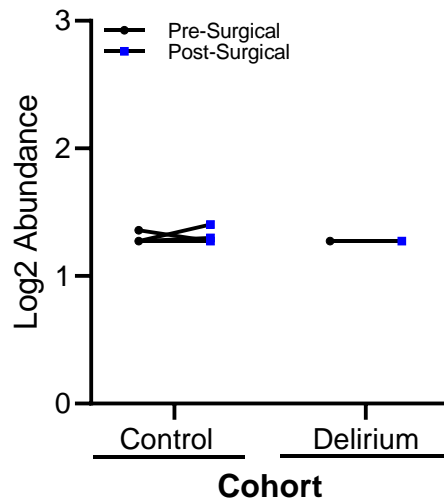**KIRREL2**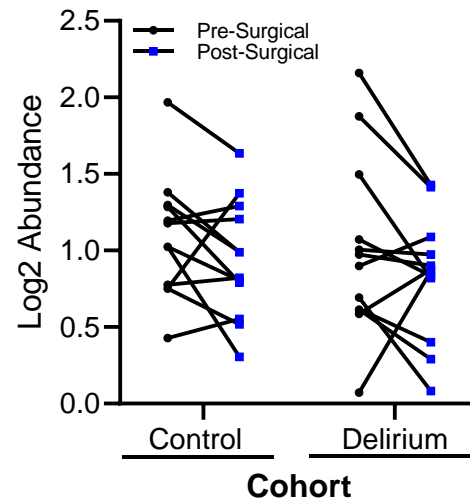**KLB**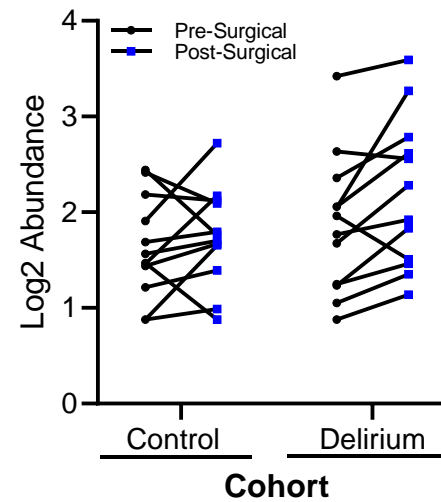**LAP-TGF- $\beta$ 1**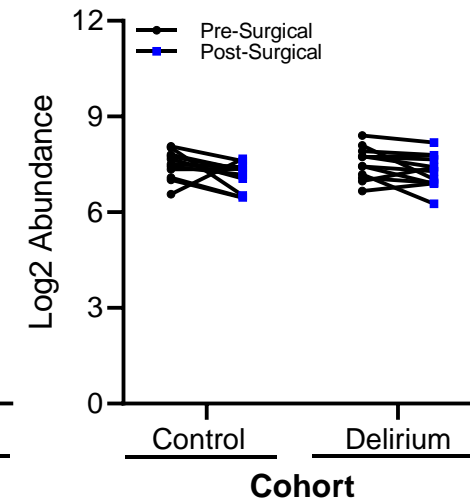

**LEPR**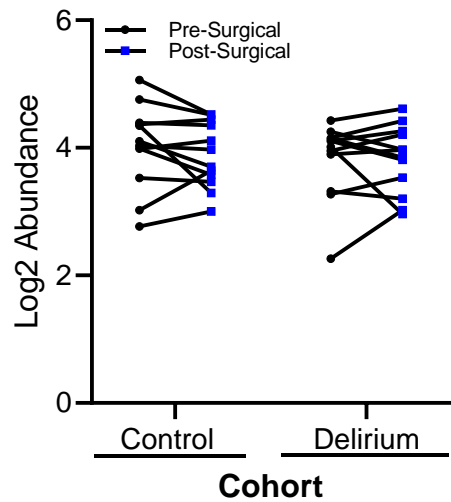**LIF**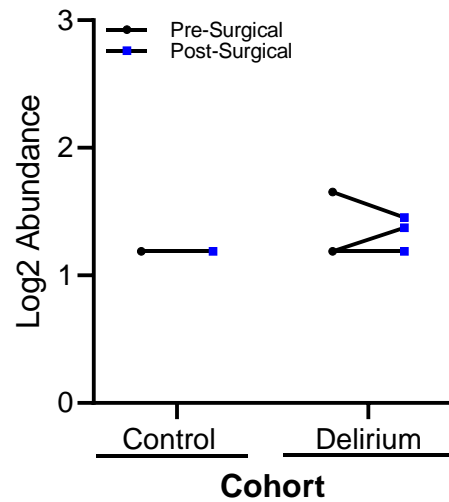**LIF-R**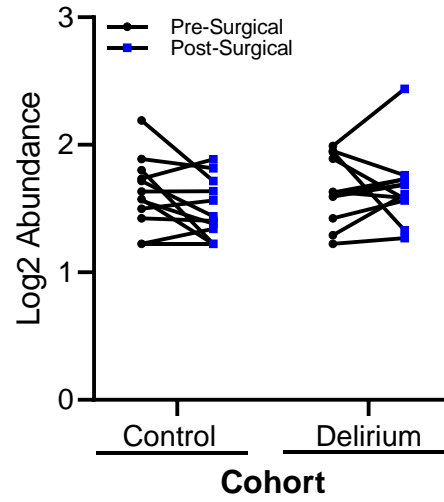**MAD1L1**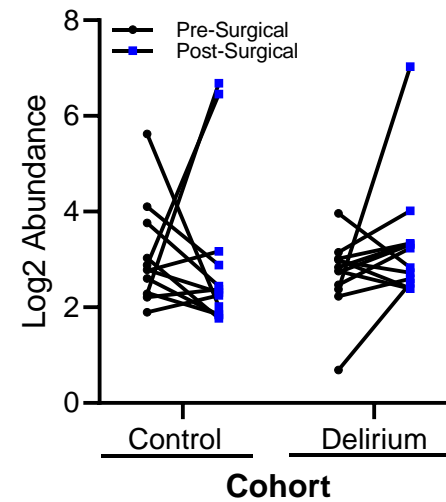**MCP-1**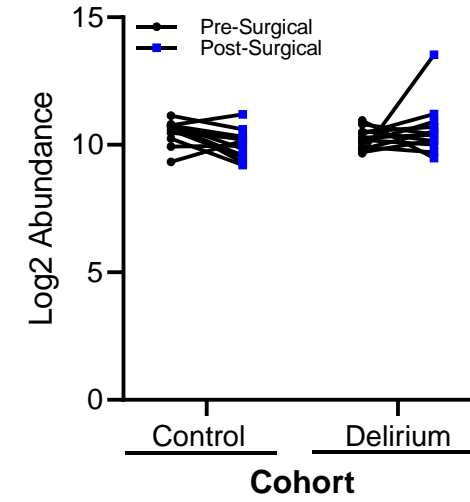**MCP-2**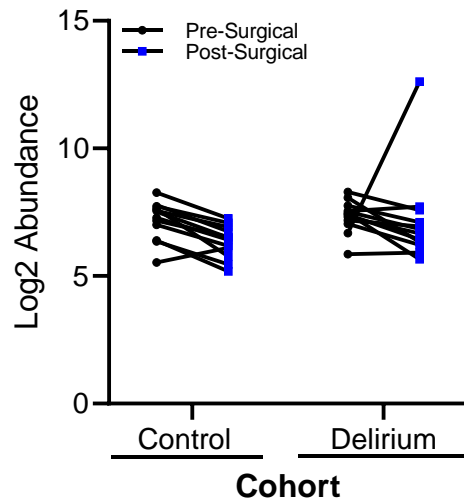**MCP-3**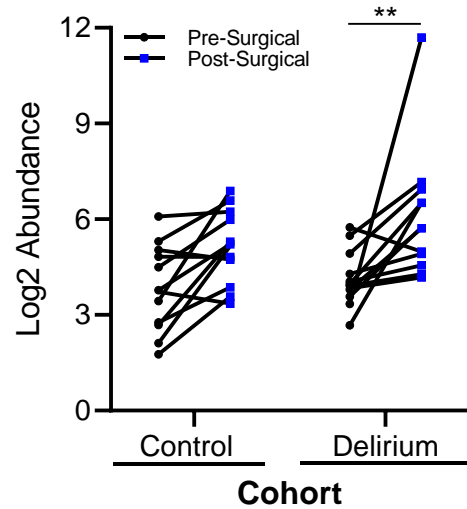**MCP-4**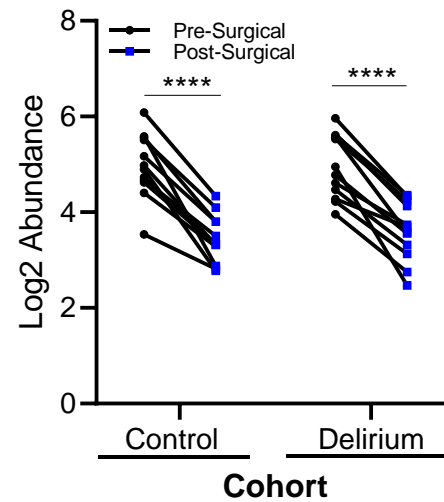**MMP-1**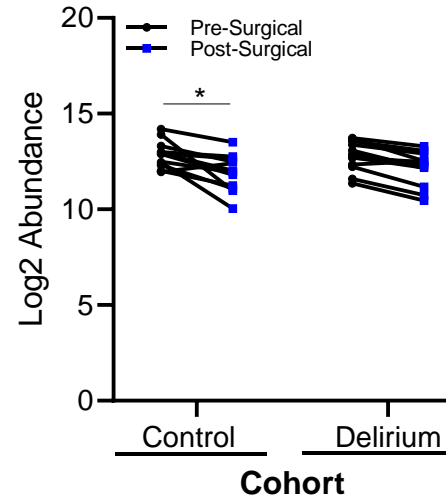**MMP-10**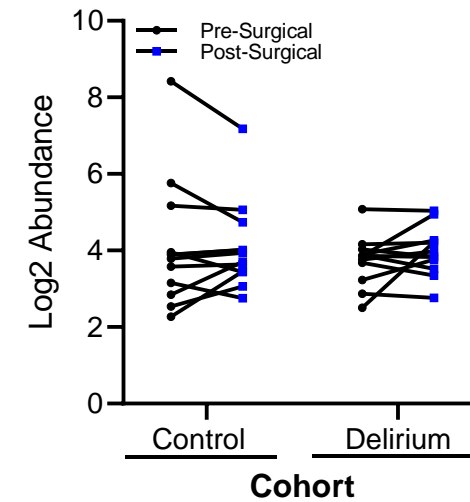

**NAA10**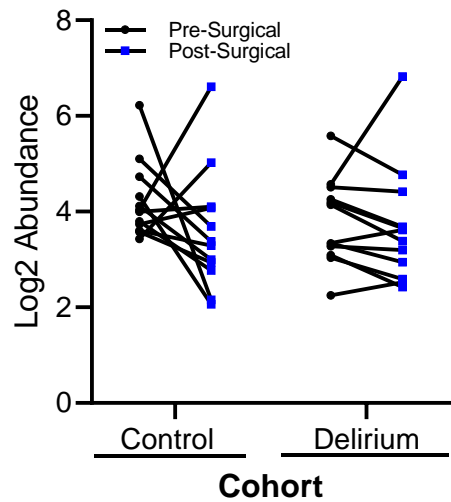**NDRG1**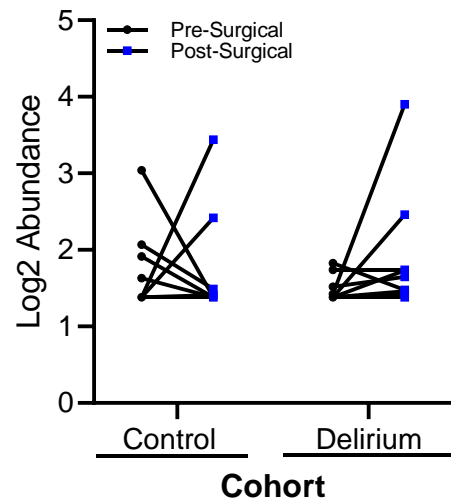**NEFL**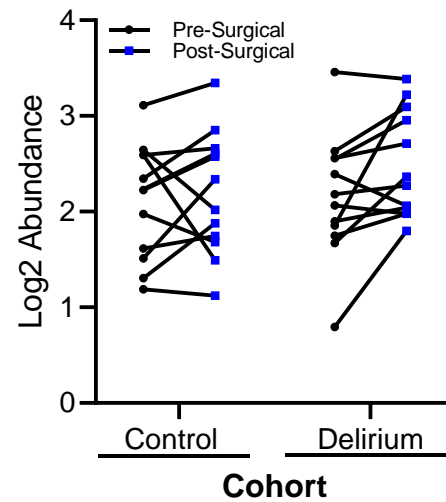**NPM1**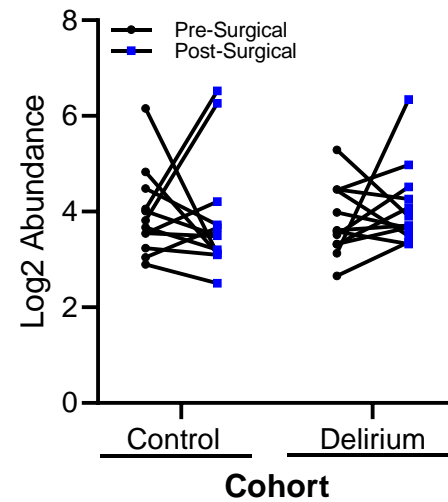**NRTN**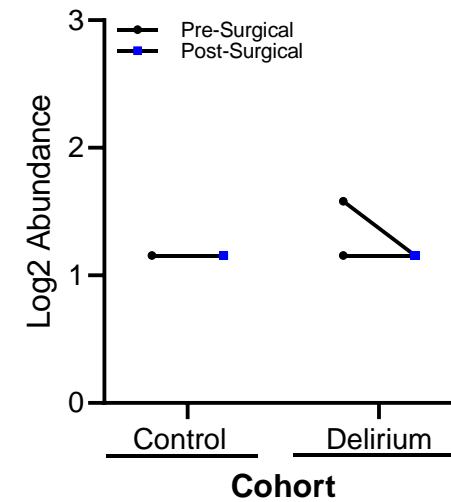**NT-3**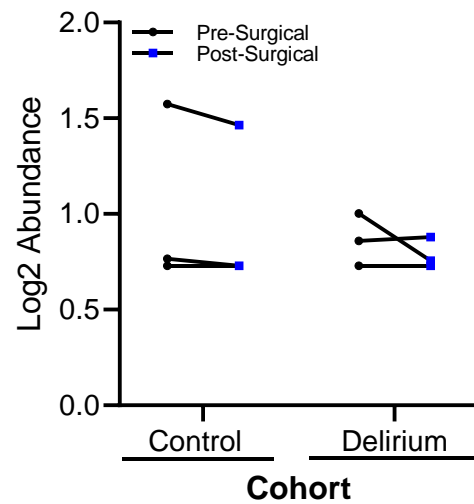**NXPH1**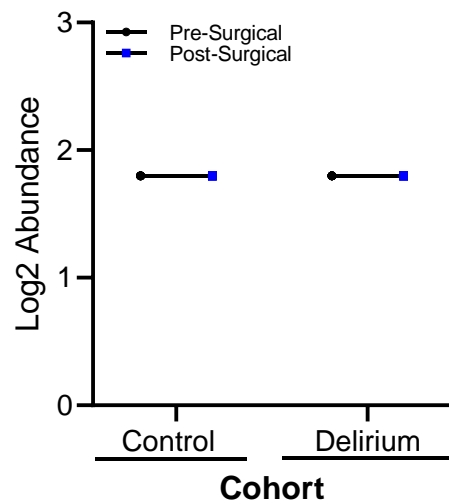**Oncostatin M**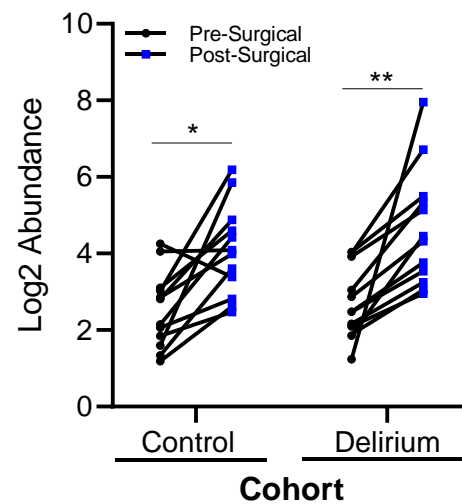**OPG**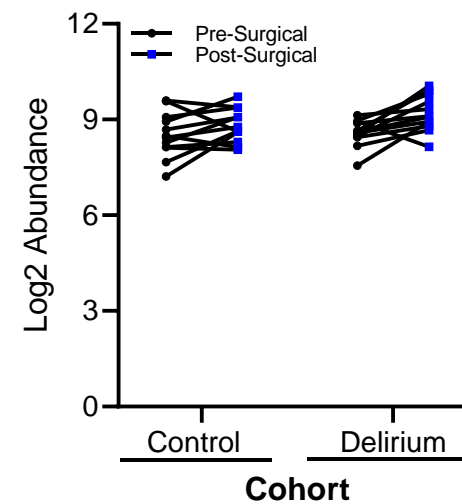**PAEP**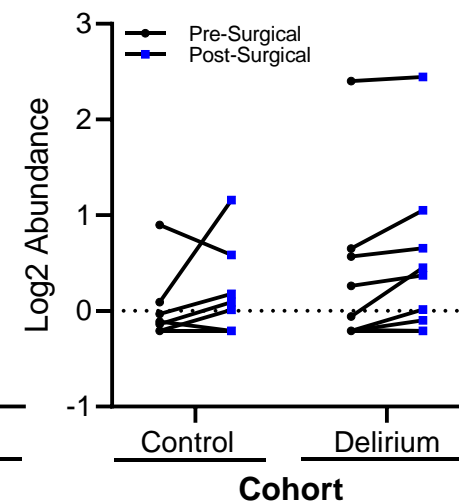

**PD-L1**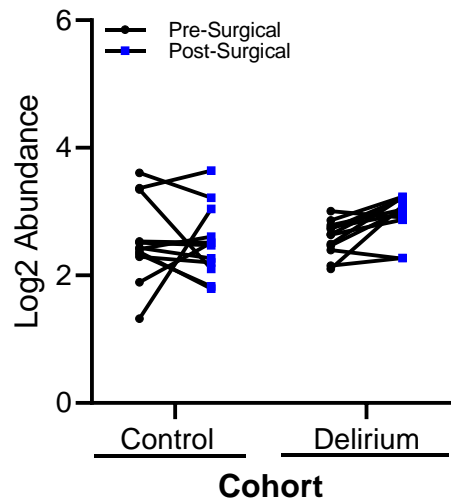**PFDN2**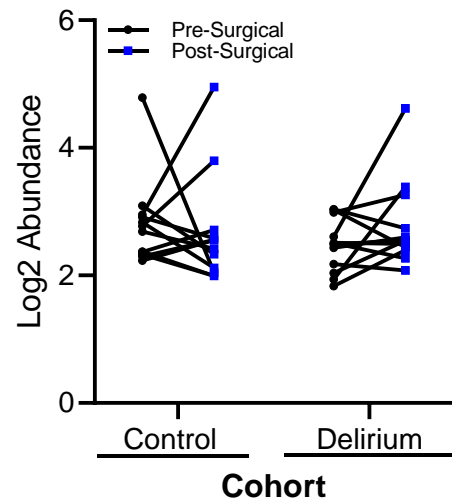**PHOSPHO1**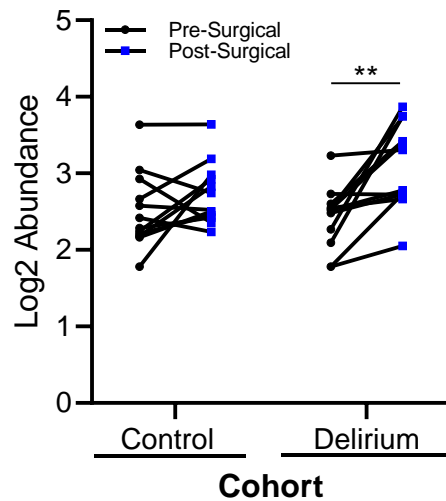**PLA2G10**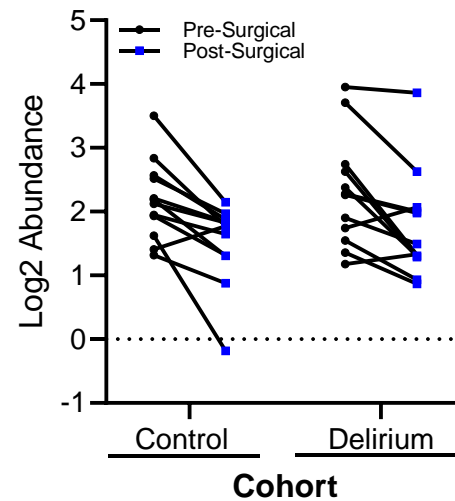**PMVK**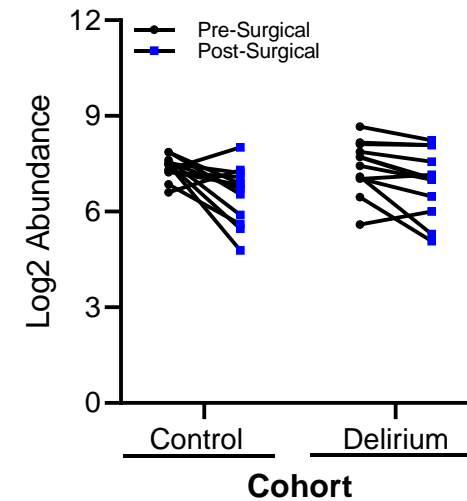**PPP3R1**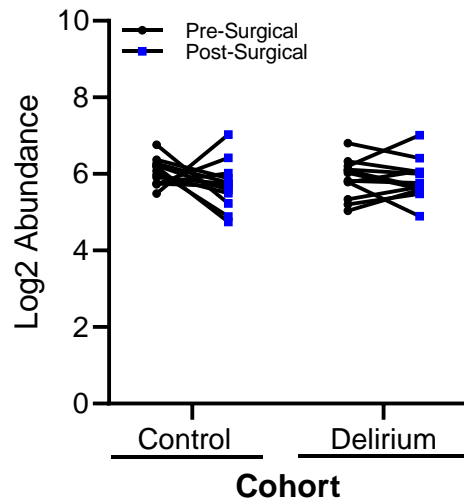**PRTFDC1**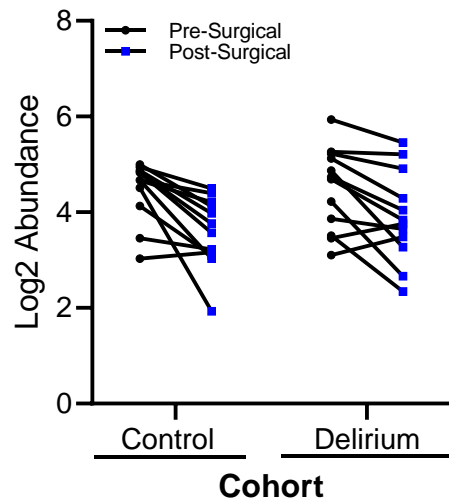**PSG1**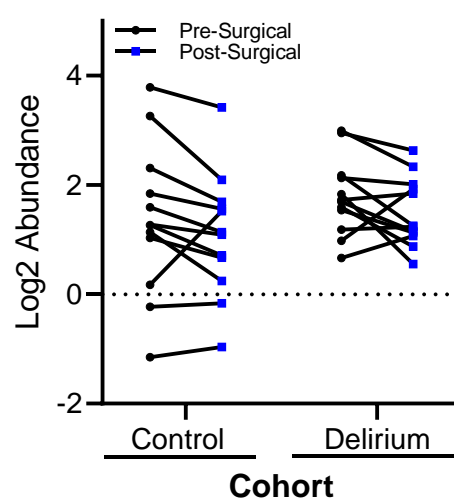**PSME1**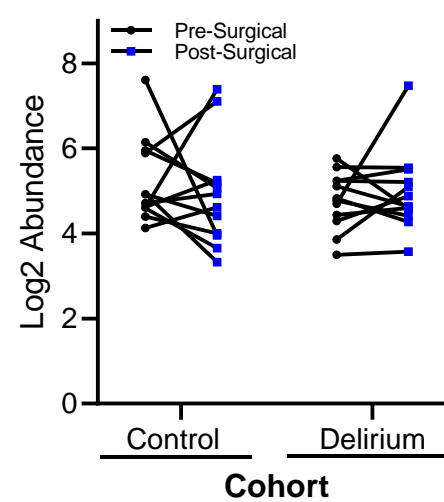**PTPN1**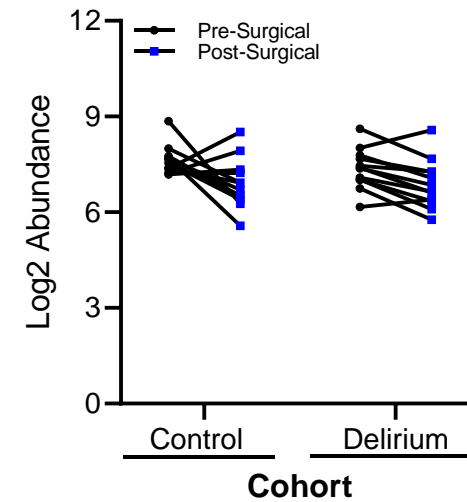



**PTS**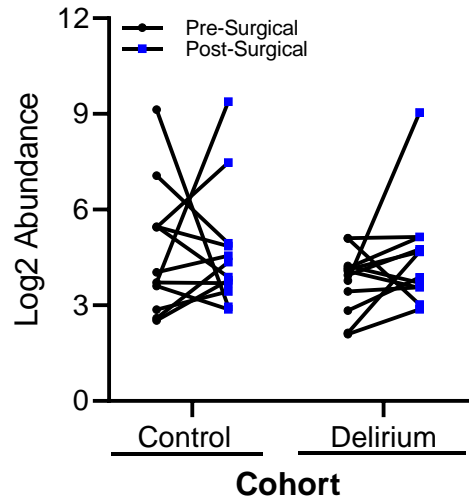**RBKS**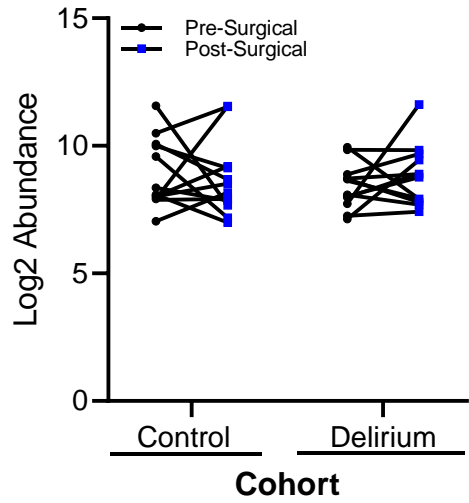**RNF31**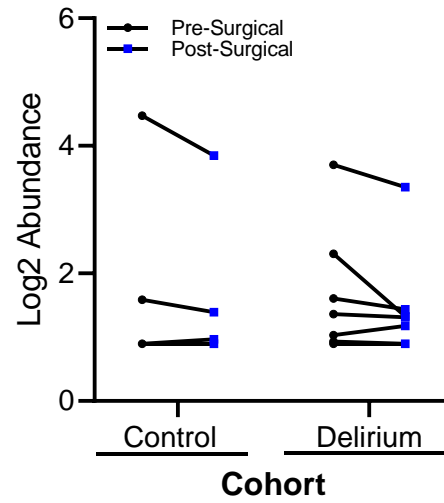**RPS6KB1**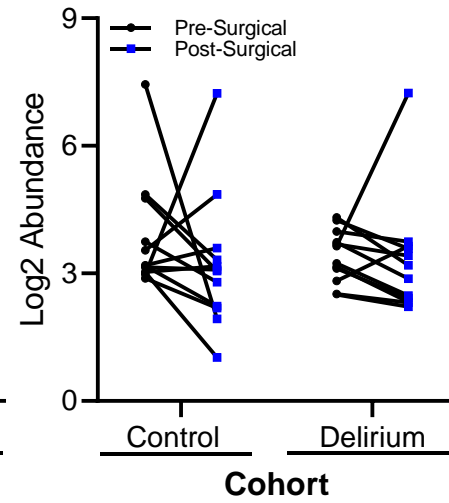**SCF**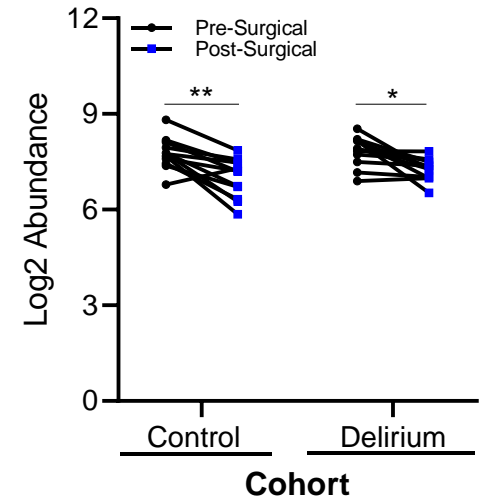**SCGB1A1**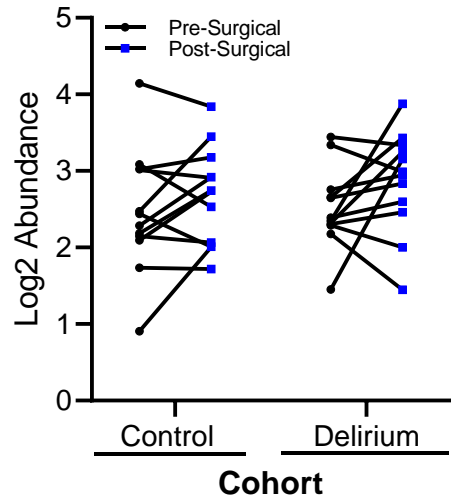**SFRP1**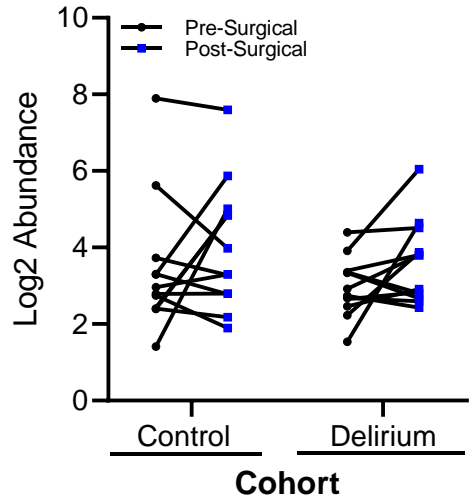**SIRT2**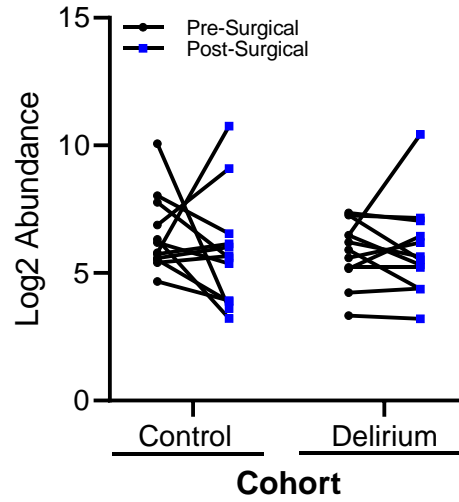**SLAMF1**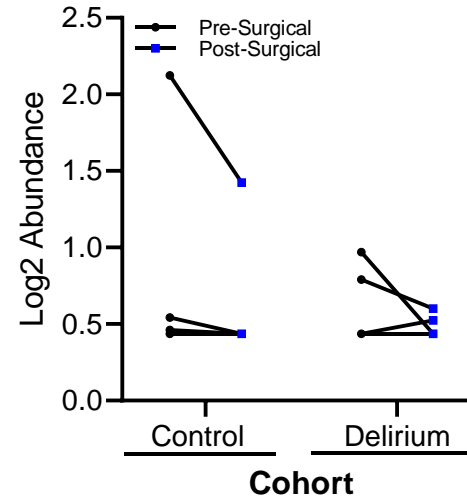**SMOC1**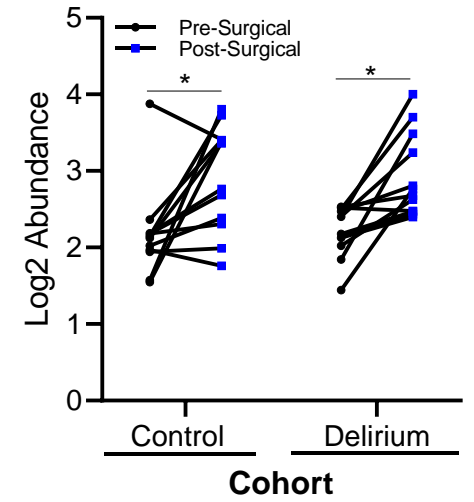

**SNCG**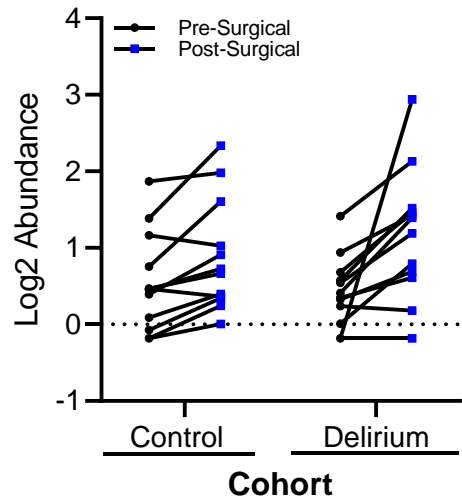**SRP14**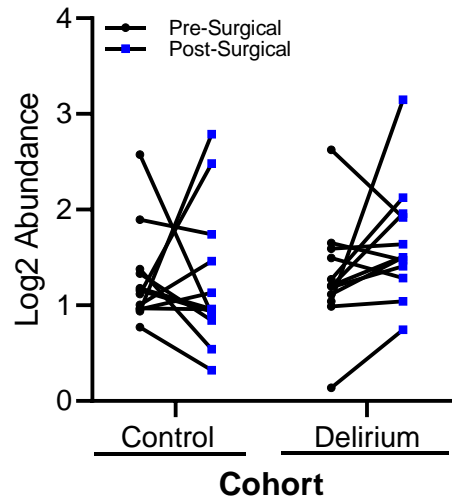**ST1A1**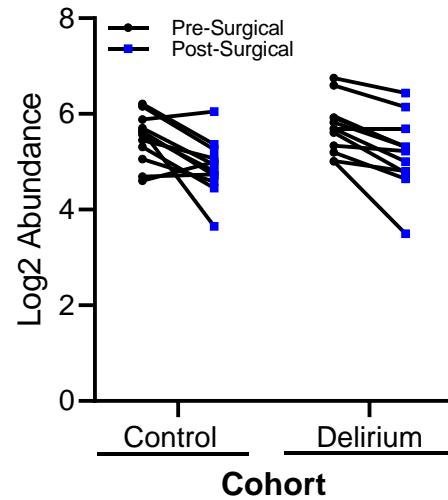**STAMPB**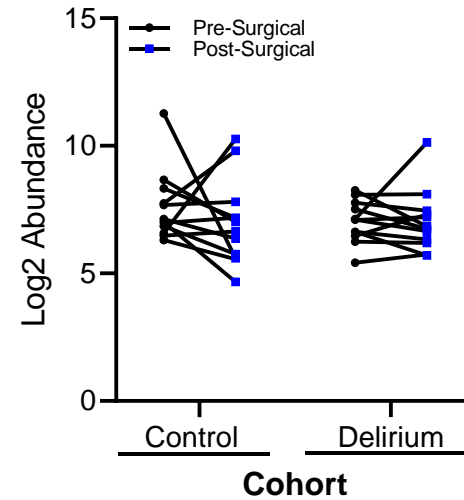**TBCB**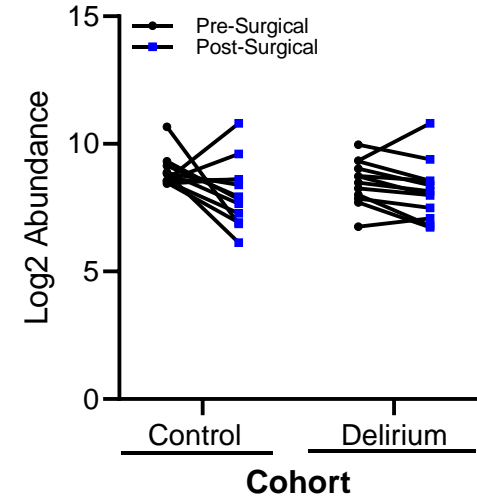**TDGF1**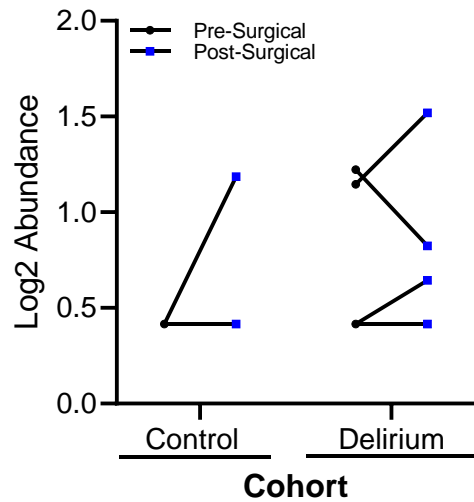**TNF**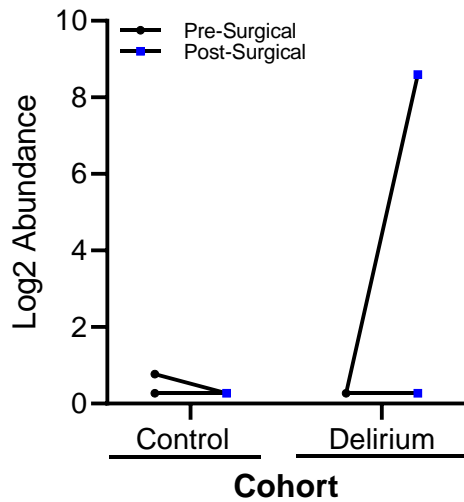**TNF- $\alpha$** 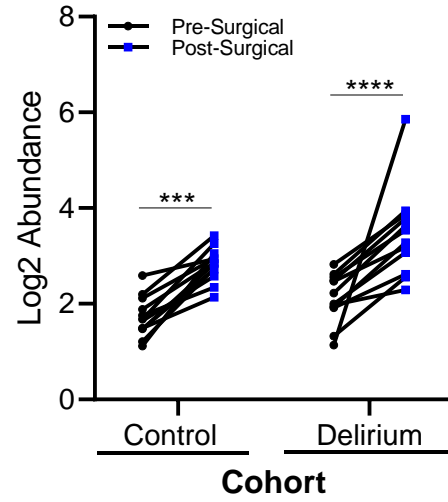**TNFB**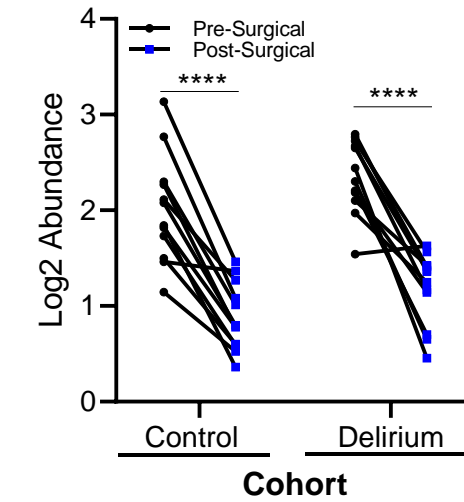**TNFRSF9**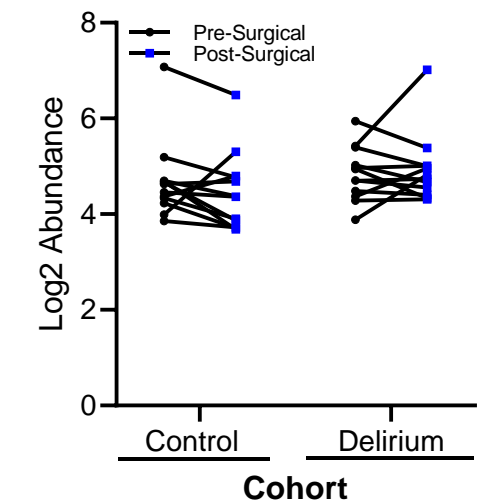

**TNFRSF13C**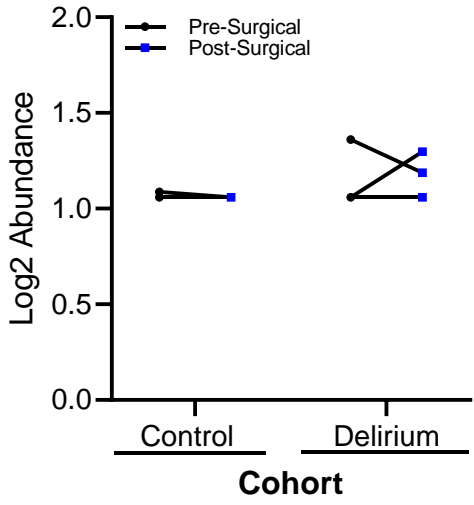**TNFSF14**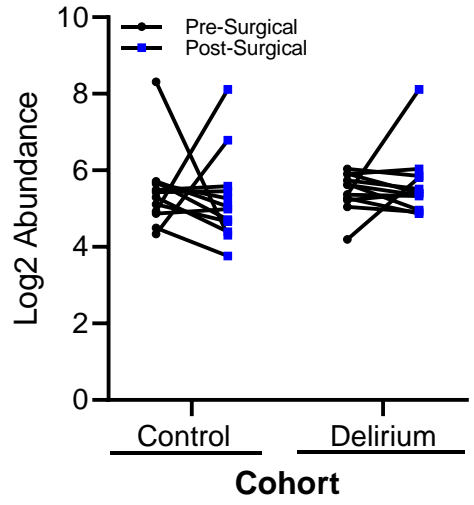**TPPP3**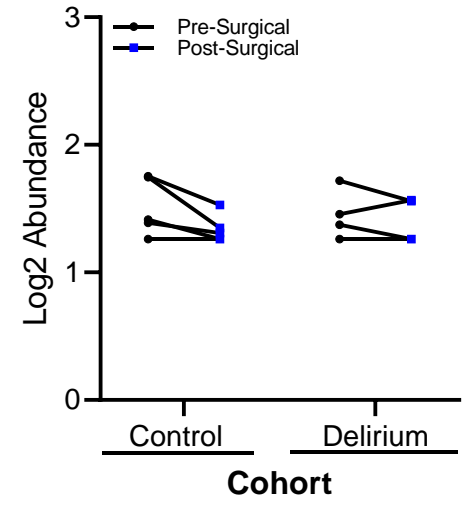**TRAIL**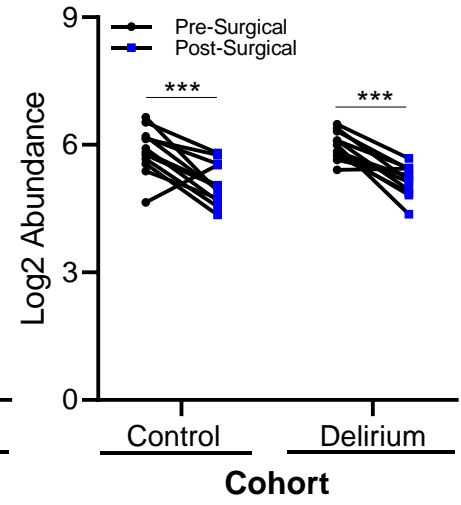**TRANCE**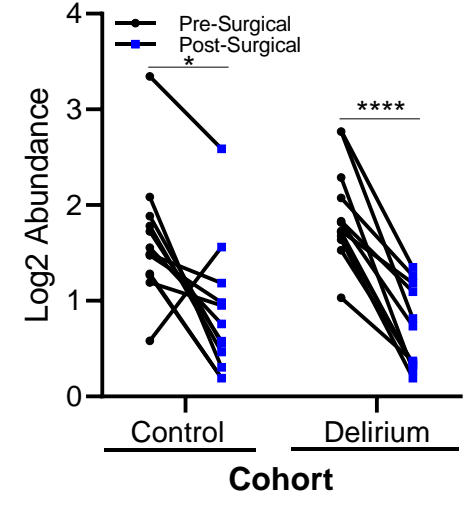**TSLP**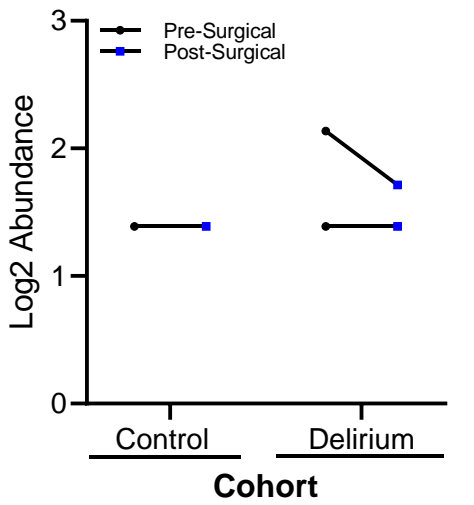**TWEAK**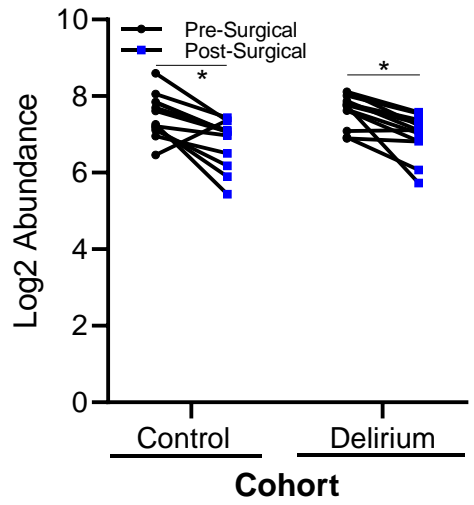**UBE2F**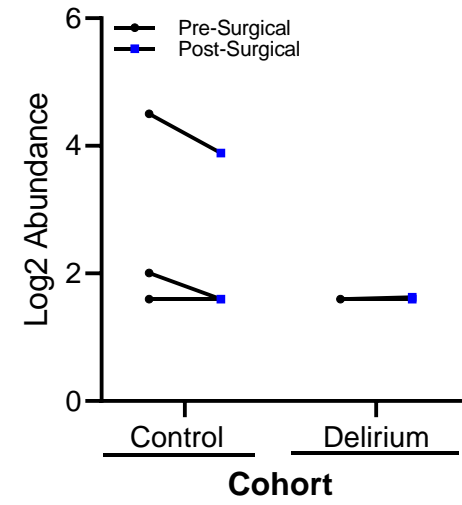**Urokinase**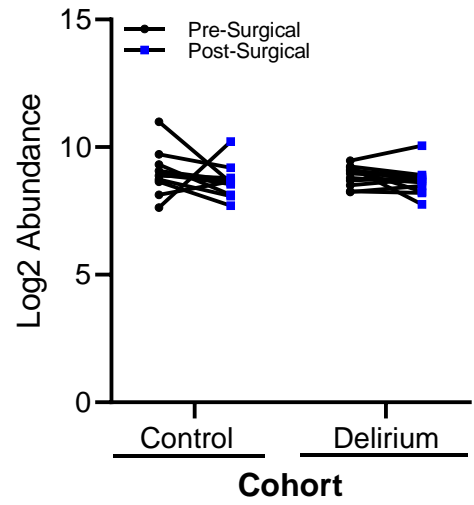**VEGFA**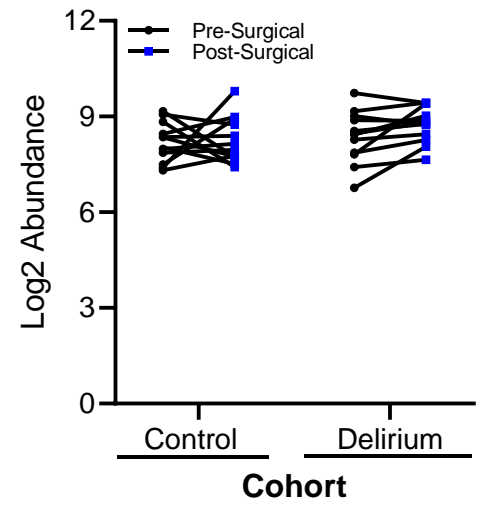

Supplement: NIHMS1703598-supplement-mmc1.pdf [file NIHMS1703598-supplement-mmc1.pdf]
